# Supplementary material for: The Affymetrix DMET Plus Platform Reveals Unique Distribution of ADME-Related Variants in Ethnic Arabs
Source: Dis Markers. 2015 Feb 22;2015:542543. doi: 10.1155/2015/542543 (PMC4353852; doi:10.1155/2015/542543)
Supplement: Supplementary file 1 — The supplementary material is a compilation of the genotyping data for the 1936 ADME-related gene variants in the Saudi Arab population and available literature of the their distribution in the Caucasian and Chinese populations (for comparison). [file 542543.f1.xlsx]

## Sheet: DMET Suppl data
Index	Probe Set ID	dbSNP RS ID	Chromosome	Physical Position	Common Name	Minor Allele Frequency	Alleles Reported Strand	Allele Code	Freq. A	Freq. B	Freq. C	mPCR Region	Type	Marker Call Rate	PassQuality		Europ	CEU	Jap	Chinese	African	others
1	AM_10001	rs4148942	10	73769359	CHST3_c.*1130C>G	0.021	C // G	A // B	0.979	0.021	NaN	N	snp	99.9	1			N/D		N/D
2	AM_10003	rs4148943	10	73769507	CHST3_c.*1278C>T	0.43	C // T	A // B	0.57	0.43	NaN	N	snp	99.9	1			0.45 (C )		0.11 (T)
3	AM_10004	rs4148944	10	73769543	CHST3_c.*1314G>A	0.133	A // G	A // B	0.133	0.867	NaN	N	snp	100	1			0.14 (A)		0.33 (A)
4	AM_10005	rs4148945	10	73769590	CHST3_c.*1361C>T	0.328	C // T	A // B	0.672	0.328	NaN	N	snp	100	1			0.5 (T)		0.11 (T)
5	AM_10006	rs4148946	10	73770073	CHST3_c.*1844T>C	0.404	T // C	A // B	0.596	0.404	NaN	N	snp	100	1			0.35 (C )		0.41 (T)
6	AM_10008	rs7072219	10	73770355	CHST3_c.*2126A>C	0.035	A // C	A // B	0.965	0.035	NaN	N	snp	99.7	1			N/D		N/D
7	AM_10010	rs4148949	10	73770651	CHST3_c.*2422C>T	0.392	C // T	A // B	0.608	0.392	NaN	N	snp	100	1			0.35 (T)		0.42 (C )
8	AM_10011	rs4148950	10	73771706	CHST3_c.*3477G>A	0.397	A // G	A // B	0.397	0.603	NaN	N	snp	100	1			0.5		0.11 (A)
9	AM_10012	rs4148951	10	73771784	CHST3_c.*3555G>A	0.035	A // G	A // B	0.035	0.965	NaN	N	snp	100	1			0.01 (A)		N/D
10	AM_10013	rs1871450	10	73772014	CHST3_c.*3785G>A	0.397	A // G	A // B	0.397	0.603	NaN	N	snp	100	1			0.5		0.12 (A)
11	AM_10014	rs731027	10	73772336	CHST3_c.*4107T>C	0.431	C // T	A // B	0.431	0.569	NaN	N	snp	99.3	1			0.49 (T)		0.11 (C )
12	AM_10016	rs730720	10	73772762	CHST3_c.*4533C>T	0.432	T // C	A // B	0.432	0.568	NaN	N	snp	99.9	1			0.49 (G)		0.11 (A)
13	AM_10017	rs4148953	10	73772999	CHST3_c.*4770G>A	0.012	G // A	A // B	0.988	0.012	NaN	N	snp	100	1			0.0 (A)		0.17 (A)
14	AM_10019	rs1065766	10	82033438	MAT1A_c.*99A>T	0	T // A	A // B	0	1	NaN	N	snp	100	1			N/D		N/D
15	AM_10020	rs7087728	10	82033470	MAT1A_c.*67C>T	0.205	T // C	A // B	0.205	0.795	NaN	N	snp	100	1			0.18 (A)		0.04 (A)
16	AM_10021	rs17851642	10	82034839	MAT1A_c.885A>T(A295A)	0	T // A	A // B	0	1	NaN	N	snp	100	1			N/D		N/D
17	AM_10022	rs72558181	10	82034933	MAT1A_c.791G>A(R264H)	0	A // G	A // B	0	1	NaN	N	snp	99.7	1			N/D		N/D
18	AM_10023	rs9285726	10	82035150	MAT1A_c.769-195A>T	0.13	T // A	A // B	0.13	0.87	NaN	N	snp	99.1	1			0.38 (A)		0.01 (A)
19	AM_10024	rs17102596	10	82035173	MAT1A_c.769-218A>G	0.213	A // G	A // B	0.787	0.213	NaN	N	snp	99.7	1			0.18 (T)		0.03 (T)
20	AM_10025	rs4934027	10	82035560	MAT1A_c.768+572G>A	0.203	G // A	A // B	0.797	0.203	NaN	N	snp	100	1			0.20 (T)		0.44 (T)
21	AM_10028	rs7917267	10	94824145	CYP26C1_c.713G>A(R238Q)	0.004	G // A	A // B	0.996	0.004	NaN	N	snp	100	1			0.00.1 (A)		0.00.1 (A)
22	AM_10030	rs2229104	10	94836881	CYP26A1_c.1314C>G(G438G)	0.001	C // G	A // B	0.999	0.001	NaN	N	snp	100	1			0.000 (G)		0.000 (G)
23	AM_10031	rs4418728	10	94839724	CYP26A1_c.*2663T>G	0.418	G // T	A // B	0.582	0.418	NaN	N	snp	99.6	1			0.431 (T)		0.211 (G)
24	AM_10033	rs7905939	10	94841107	CYP26A1_c.*4046G>A	0.315	G // A	A // B	0.685	0.315	NaN	N	snp	100	1			0.199 (A)		0.000 (A)
25	AM_10034	rs11187270	10	94841988	CYP26A1_c.*4927C>T	0.002	C // T	A // B	0.998	0.002	NaN	N	snp	100	1			0.000 (T)		0.000 (T)
26	AM_10035	rs10882140	10	94842213	CYP26A1_c.*5152T>G	0.473	G // T	A // B	0.473	0.527	NaN	N	snp	97.8	1			0.469 (G)		0.186 (G)
27	AM_10039	rs41291550	10	96447562	CYP2C18_c.204T>A(Y68X)	0.012	A // T	A // B	0.012	0.988	NaN	N	snp	100	1			0.006 (A)		0.037 (A)
28	AM_10042	rs72558183	10	96454774	CYP2C18_c.582insT	0	- // T	A // B	1	0	NaN	N	in-del	100	1			N/D		N/D
29	AM_10044	rs2296681	10	96466592	CYP2C18_c.694A>G(K232E)	0	G // A	A // B	0	1	NaN	N	snp	100	1			0.000 (C )		0.000 (C )
30	AM_10047	rs2281891	10	96493058	CYP2C18_c.1154C>T(T385M)	0.085	T // C	A // B	0.085	0.915	NaN	N	snp	100	1
31	AM_10048	rs2860840	10	96495232	CYP2C18_c.*31C>T(3'UTR)	0.269	T // C	A // B	0.269	0.731	NaN	N	snp	100	1			0.384 (T)		0.233 (T)
32	AM_10052	rs1326830	10	96495793	CYP2C18_c.*592C>A(3'UTR)	0.009	A // C	A // B	0.009	0.991	NaN	N	snp	100	1			0.000 (T)		0.174 (T)
33	AM_10053	rs12248560	10	96521657	CYP2C19*17_-806C>T	0.256	C // T	A // B	0.744	0.256	NaN	N	snp	99.4	1			0.217 (T)		0.022 (T)
34	AM_10054	rs28399504	10	96522463	CYP2C19*4_1A>G(M1V)	0	A // G	A // B	1	0	NaN	N	snp	100	1			0.000 (G)		0.012 (G)
35	AM_10055	rs55752064	10	96522512	CYP2C19*14_50T>C(L17P)	0	C // T	A // B	0	1	NaN	N	snp	100	1			0.000 (C )		N/D
36	AM_10056	rs17882687	10	96522517	CYP2C19*15_55A>C(I19L)	0.001	A // C	A // B	0.999	0.001	NaN	N	snp	97.6	1			0.000 (C )		0.000 (C )
37	AM_10059	rs17878459	10	96534922	CYP2C19*2B_12460G>C(E92D)	0	G // C	A // B	1	0	NaN	N	snp	98.9	1			0.016 (C )		0.000 (C )
38	AM_10060	rs41291556	10	96535173	CYP2C19*8_12711T>C(W120R)	0.001	C // T	A // B	0.001	0.999	NaN	N	snp	100	1			0.017 ( C)		0.000 (C )
39	AM_10062	rs72558184	10	96535210	CYP2C19*6_12748G>A(R132Q)	0.002	G // A	A // B	0.998	0.002	NaN	N	snp	100	1			N/D		N/D
40	AM_10064	rs17884712	10	96535246	CYP2C19*9_12784G>A(R144H)	0.002	A // G	A // B	0.002	0.998	NaN	N	snp	92.1	1			0.000 (A)		N/D
41	AM_10068	rs4986893	10	96540410	CYP2C19*3_17948G>A(W212X)	0.001	A // G	A // B	0.001	0.999	NaN	N	snp	100	1			0.000 (A)		0.058 (A)
42	AM_10069	rs6413438	10	96541615	CYP2C19*10_19153C>T(P227L)	0	C // T	A // B	1	0	NaN	N	snp	100	1			0.004 (T)		0.012 (T)
43	AM_10071	rs72558185	10	96541656	CYP2C19_721insG	0	- // G	A // B	1	0	NaN	N	in-del	100	1			N/D		N/D
44	AM_10072	rs72558186	10	96541756	CYP2C19*7_19294T>A(SpliceDefect)	0	T // A	A // B	1	0	NaN	N	snp	100	1			N/D		N/D
45	AM_10075	rs3758581	10	96602623	CYP2C19_80161G>A(V331I)	0.055	A // G	A // B	0.055	0.945	NaN	N	snp	100	1			0.051 (A)		0.067 (A)
46	AM_10077	rs17879685	10	96609752	CYP2C19*13_87290C>T(R410C)	0.001	C // T	A // B	0.999	0.001	NaN	N	snp	100	1			0.000 (T)		0.000 (T)
47	AM_10079	rs56337013	10	96612495	CYP2C19*5_90033C>T(R433W)	0	C // T	A // B	1	0	NaN	N	snp	99.7	1			N/D		N/D
48	AM_10080	rs5787121	10	96612514	CYP2C19_90052delG	0	- // G	A // B	0	1	NaN	N	in-del	100	1
49	AM_10082	rs55640102	10	96612671	CYP2C19*12_90209A>C(X491C)	0	C // A	A // B	0	1	NaN	N	snp	100	1			0.000 (T)		N/D
50	AM_10090	rs67807361	10	96698494	CYP2C9_5080C>A(L19I)	0.002	A // C	A // B	0.998	0.002	NaN	N	snp	87.2	1			0.000 (A)		N/D
51	AM_10093	rs72558187	10	96701715	CYP2C9*13_3276T>C(L90P)	0	C // T	A // B	0	1	NaN	N	snp	99.7	1			N/D		N/D
52	AM_10095	rs72558188	10	96701970	CYP2C9*25_3531_3540del10	0	- // AGAAATGGAA	A // B	0	1	NaN	N	in-del	100	1
53	AM_10097	rs72558189	10	96701991	CYP2C9*14_3552G>A(R125H)	0	A // G	A // B	0	1	NaN	N	snp	100	1			N/D		N/D
54	AM_10100	rs1799853	10	96702047	CYP2C9*2_3608C>T(R144C)	0.148	C // T	A // B	0.852	0.148	NaN	N	snp	98.9	1			0.104 (T)		0.000 (T)
55	AM_10104	rs72558190	10	96707539	CYP2C9*15_9100C>A(S162x)	0	C // A	A // B	1	0	NaN	N	snp	100	1			N/D		N/D
56	AM_10106	rs2256871	10	96708974	CYP2C9*9_10535A>G(H251R)	0.006	A // G	A // B	0.994	0.006	NaN	N	snp	100	1			0.008 (G)		0.000 (G)
57	AM_10107	rs9332130	10	96709037	CYP2C9*10_10598A>G(E272G)	0	A // G	A // B	1	0	NaN	N	snp	99.6	1			0.009 (G)		0.000 (G)
58	AM_10108	rs9332131	10	96709039	CYP2C9*6_10601delA(K273X)	0	- // A	A // B	0	1	NaN	N	in-del	99.9	1			0.000 (/-)		N/D
59	AM_10109	rs72558192	10	96731936	CYP2C9*16_33497A>G(T299A)	0	A // G	A // B	1	0	NaN	N	snp	100	1			N/D		N/D
60	AM_10111	rs28371685	10	96740981	CYP2C9*11_42542C>T(R335W)	0.004	C // T	A // B	0.996	0.004	NaN	N	snp	100	1			0.000 (T)		0.006 (T)
61	AM_10112	rs1057909	10	96741051	CYP2C9_42612A>G(Y358C)	0	A // G	A // B	1	0	NaN	N	snp	99.9	1			0.000 (G)		0.000 (G)
62	AM_10113	rs1057910	10	96741053	CYP2C9*3_42614A>C(I359L)	0.056	A // C	A // B	0.944	0.056	NaN	N	snp	98.4	1			0.058 (C )		0.042 (C )
63	AM_10114	rs56165452	10	96741054	CYP2C9*4_42615T>C(I359T)	0	T // C	A // B	1	0	NaN	N	snp	99.9	1			N/D		N/D
64	AM_10115	rs28371686	10	96741058	CYP2C9*5_42619C>G(D360E)	0.001	G // C	A // B	0.001	0.999	NaN	N	snp	99.9	1			0.000 (G)		N/D
65	AM_10119	rs2017319	10	96748635	CYP2C9_55221C>T(A441A)	0.025	C // T	A // B	0.975	0.025	NaN	N	snp	99.9	1			0.000 (T)		0.006 (T)
66	AM_10120	rs1057911	10	96748737	CYP2C9_55323A>T(G475G)	0.062	T // A	A // B	0.062	0.938	NaN	N	snp	100	1			0.058 (T)		0.044 (T)
67	AM_10121	rs9332239	10	96748777	CYP2C9*12_50338C>T(P489S)	0	C // T	A // B	1	0	NaN	N	snp	100	1			0.000 (T)		0.000 (T)
68	AM_10122	rs28399518	10	96796796	CYP2C8_32364C>T(3'UTR)	0.001	C // T	A // B	0.999	0.001	NaN	N	snp	75.6	1			N/D		N/D
69	AM_10123	rs3832694	10	96796974	CYP2C8*12_32184_32186delTTG(V461X)	0	- // TTG	A // B	0	1	NaN	N	in-del	100	1			N/D		N/D
70	AM_10124	rs66501115	10	96798735	CYP2C8_30425C>G(P404A)	0	G // C	A // B	0	1	NaN	N	snp	100	1			0.000 (G)		N/D
71	AM_10125	rs10509681	10	96798749	CYP2C8*3_30411A>G(K399R)	0.169	G // A	A // B	0.169	0.831	NaN	N	snp	99.3	1			0.137 (C )		0.000 (C )
72	AM_10126	rs72558194	10	96798776	CYP2C8_30384T>C(L390S)	0	T // C	A // B	1	0	NaN	N	snp	100	1			N/D		N/D
73	AM_10128	rs11572103	10	96818106	CYP2C8*2_11054A>T(I269F)	0.027	T // A	A // B	0.027	0.973	NaN	N	snp	100	1			0.000 (T)		0.000 (T)
74	AM_10129	rs1058930	10	96818119	CYP2C8*4_11041C>G(I264M)	0.005	G // C	A // B	0.005	0.995	NaN	N	snp	100	1			0.066 (G)		0.000 (G)
75	AM_10133	rs72558196	10	96826971	CYP2C8*5_2189delA(T159X)	0	- // A	A // B	0	1	NaN	N	in-del	100	1			N/D		N/D
76	AM_10135	rs11572080	10	96827030	CYP2C8*3_2130G>A(R139K)	0.155	A // G	A // B	0.155	0.845	NaN	N	snp	95.4	1			0.108 (A)		0.000 (A)
77	AM_10138	rs11572066	10	96829245	CYP2C8_-86A>C	0.001	A // C	A // B	0.999	0.001	NaN	N	snp	100	1			0.000 (C )		0.000 (C )
78	AM_10143	rs717620	10	101542578	ABCC2_c.-24C>T(5'UTR)	0.16	C // T	A // B	0.84	0.16	NaN	N	snp	100	1			0.181 (A)		0.221 (A)
79	AM_10144	rs17216156	10	101542579	ABCC2_c.-23G>A(5'UTR)	0	A // G	A // B	0	1	NaN	N	snp	99.9	1			0.000 (A)		N/D
80	AM_10145	rs927344	10	101544447	ABCC2_c.116T>A(F39Y)	0	A // T	A // B	0	1	NaN	N	snp	100	1			0.000 (A)		0.000 (A)
81	AM_10146	rs17222596	10	101544490	ABCC2_c.159A>G(K53K)	0.051	A // G	A // B	0.949	0.051	NaN	N	snp	100	1			0.048 (G)		0.000 (G)
82	AM_10147	rs17222744	10	101556957	ABCC2_c.736A>C(M246L)	0	A // C	A // B	1	0	NaN	N	snp	100	1			0.000 (C )		0.000 (C )
83	AM_10149	rs17222674	10	101559094	ABCC2_c.998A>G(D333G)	0	A // G	A // B	1	0	NaN	N	snp	100	1			0.000 (G)		0.000 (G)
84	AM_10150	rs7080681	10	101560169	ABCC2_c.1058G>A(R353H)	0.006	A // G	A // B	0.006	0.994	NaN	N	snp	100	1			0.000 (G)		0.000 (G)
85	AM_10151	rs17216198	10	101563785	ABCC2_c.1219C>T(L407L)	0.003	C // T	A // B	0.997	0.003	NaN	N	snp	100	1			0.000 (T)		N/D
86	AM_10152	rs2273697	10	101563815	ABCC2_c.1249G>A(V417I)	0.301	A // G	A // B	0.301	0.699	NaN	N	snp	100	1			0.237 (A)		0.078 (A)
87	AM_10154	rs17222589	10	101564023	ABCC2_c.1457C>T(T486I)	0	T // C	A // B	0	1	NaN	N	snp	100	1			0.000 (T)		0.028 (T)
88	AM_10155	rs17222561	10	101565157	ABCC2_c.1483A>G(K495E)	0	G // A	A // B	0	1	NaN	N	snp	100	1			0.015 (G)		N/D
89	AM_10156	rs17216233	10	101567857	ABCC2_c.1686T>G(F562L)	0	G // T	A // B	0	1	NaN	N	snp	100	1			N/D		N/D
90	AM_10157	rs72558198	10	101567974	ABCC2_c.1803insC	0	- // C	A // B	1	0	NaN	N	in-del	100	1			N/D		N/D
91	AM_10158	rs17222632	10	101572816	ABCC2_c.2009T>C(I670T)	0.004	C // T	A // B	0.004	0.996	NaN	N	snp	100	1			0.000 (C )		0.000 (C )
92	AM_10159	rs17222624	10	101572880	ABCC2_c.2073C>A(V691V)	0	C // A	A // B	1	0	NaN	N	snp	100	1			0.000 (A)		N/D
93	AM_10160	rs3740072	10	101577123	ABCC2_c.2153A>G(N718S)	0	A // G	A // B	1	0	NaN	N	snp	100	1			0.000 (C )		0.000 (C )
94	AM_10161	rs56199535	10	101578577	ABCC2_c.2302C>T(R768W)	0	C // T	A // B	1	0	NaN	N	snp	100	1			0.008 (T)		0.000 (T)
95	AM_10162	rs56220353	10	101578641	ABCC2_c.2366C>T(S789F)	0	C // T	A // B	1	0	NaN	N	snp	100	1			0.000 (T)		N/D
96	AM_10163	rs17222617	10	101578952	ABCC2_c.2546T>G(L849R)	0.001	T // G	A // B	0.999	0.001	NaN	N	snp	100	1			0.017 G)		N/D
97	AM_10164	rs3740071	10	101590120	ABCC2_c.2677G>C(E893Q)	0	G // C	A // B	1	0	NaN	N	snp	100	1			0.000 (G)		0.000 (G)
98	AM_10166	rs17222547	10	101591385	ABCC2_c.2901C>A(Y967X)	0	A // C	A // B	0	1	NaN	N	snp	100	1			0.004 (A)		0.012 (A)
99	AM_10167	rs3740070	10	101591418	ABCC2_c.2934G>A(S978S)	0	G // A	A // B	1	0	NaN	N	snp	99.4	1			0.000 (T)		0.000 (T)
100	AM_10168	rs17222554	10	101591428	ABCC2_c.2944A>G(I982V)	0	A // G	A // B	1	0	NaN	N	snp	100	1			0.000 (G)		N/D
101	AM_10169	rs45441199	10	101591737	ABCC2_c.3107T>C(I1036T)	0.012	C // T	A // B	0.012	0.988	NaN	N	snp	100	1			0.008 (C )		0.000 (C )
102	AM_10171	rs72558199	10	101591826	ABCC2_c.3196C>T(R1066X)	0	C // T	A // B	1	0	NaN	N	snp	99.4	1			N/D		N/D
103	AM_10172	rs17216345	10	101594274	ABCC2_c.3396T>C(I1132I)	0.022	C // T	A // B	0.022	0.978	NaN	N	snp	100	1			0.006 (C )		N/D
104	AM_10174	rs72558201	10	101595950	ABCC2_c.3517A>T(I1173F)	0	A // T	A // B	1	0	NaN	N	snp	100	1			N/D		N/D
105	AM_10175	rs8187692	10	101595975	ABCC2_c.3542G>T(R1181L)	0.008	G // T	A // B	0.992	0.008	NaN	N	snp	100	1			0.000 (T)		0.011 (T)
106	AM_10176	rs17216324	10	101595994	ABCC2_c.3561G>A(E1187E)	0	A // G	A // B	0	1	NaN	N	snp	89.9	1			N/D		N/D
107	AM_10177	rs17222723	10	101595996	ABCC2_c.3563T>A(V1188E)	0.144	A // T	A // B	0.144	0.856	NaN	N	snp	100	1			0.067 (A)		0.000 (A)
108	AM_10178	rs8187699	10	101603631	ABCC2_c.3817A>G(T1273A)	0	A // G	A // B	1	0	NaN	N	snp	100	1			0.000 (G)		0.000 (G)
109	AM_10179	rs17216317	10	101604107	ABCC2_c.3872C>T(P1291L)	0.001	C // T	A // B	0.999	0.001	NaN	N	snp	100	1			0.000 (T)		N/D
110	AM_10180	rs4148400	10	101604130	ABCC2_c.3895A>C(K1299Q)	0	A // C	A // B	1	0	NaN	N	snp	100	1			0.000 (C )		0.000 (C )
111	AM_10181	rs4148401	10	101604162	ABCC2_c.3927C>T(Y1309Y)	0	T // C	A // B	0	1	NaN	N	snp	99.9	1			0.000 (T)		N/D
112	AM_10182	rs66898362	10	101604163	ABCC2_c.3928C>T(R1310X)	0	C // T	A // B	1	0	NaN	N	snp	100	1			0.000 (T)		0.006 (T)
113	AM_10183	rs3740066	10	101604207	ABCC2_c.3972C>T(I1324I)	0.31	C // T	A // B	0.69	0.31	NaN	N	snp	99.6	1			0.342 (A)		0.267 (A)
114	AM_10184	rs17216275	10	101605455	ABCC2_c.4062C>T(A1354A)	0.004	C // T	A // B	0.996	0.004	NaN	N	snp	100	1			0.001 (T)		N/D
115	AM_10185	rs7899457	10	101605503	ABCC2_c.4110C>T(L1370L)	0.004	C // T	A // B	0.996	0.004	NaN	N	snp	100	1			0.000 (T)		0.000 (T)
116	AM_10188	rs1137968	10	101606861	ABCC2_c.4290G>T(V1430V)	0.145	G // T	A // B	0.855	0.145	NaN	N	snp	100	1			0.044 (T)		0.000 (T)
117	AM_10190	rs8187706	10	101610455	ABCC2_c.4410G>A(E1470E)	0.004	A // G	A // B	0.004	0.996	NaN	N	snp	100	1			0.000 (A)		0.000 (A)
118	AM_10191	rs8187707	10	101610533	ABCC2_c.4488C>T(H1496H)	0.146	C // T	A // B	0.854	0.146	NaN	N	snp	100	1			0.053 (T)		0.000 (T)
119	AM_10192	rs8187709	10	101611277	ABCC2_c.4527C>T(N1509N)	0	C // T	A // B	1	0	NaN	N	snp	100	1			0.000 (T)		0.012 (T)
120	AM_10193	rs8187710	10	101611294	ABCC2_c.4544G>A(C1515Y)	0.165	A // G	A // B	0.165	0.835	NaN	N	snp	99	1			0.053 (A)		0.000 (A)
121	AM_10194	rs6164	10	104590702	CYP17A1_6417G>A(P428P)	0	A // G	A // B	0	1	NaN	N	snp	100	1			0.000 (A)		N/D
122	AM_10198	rs1042386	10	104592870	CYP17A1_4249C>T(D283D)	0	T // C	A // B	0	1	NaN	N	snp	100	1			0.000 (T)		0.000 (T)
123	AM_10201	rs6163	10	104596924	CYP17A1_195G>T(S65S)	0.363	T // G	A // B	0.363	0.637	NaN	N	snp	99.9	1			0.381 (A)		0.452 (C )
124	AM_10202	rs6162	10	104596981	CYP17A1_138C>T(H46H)	0.444	T // C	A // B	0.444	0.556	NaN	N	snp	99.9	1			0.408 (A)		0.456 (G )
125	AM_10203	rs762563	10	104597053	CYP17A1_66C>G(C22W)	0	C // G	A // B	1	0	NaN	N	snp	100	1			0.000 (G)		0.011 (G)
126	AM_10206	rs743572	10	104597152	CYP17A1_-34T>C	0.364	C // T	A // B	0.364	0.636	NaN	N	snp	99.9	1			0.381 (A)		0.453 (G )
127	AM_10220	rs11509436	10	106019447	GSTO1_c.257C>G(S86C)	0	C // G	A // B	1	0	NaN	N	snp	100	1			0.000 (G)		N/D
128	AM_10221	rs4925	10	106022789	GSTO1_c.419C>A(A140D)	0.328	A // C	A // B	0.328	0.672	NaN	N	snp	100	1			0.331 (A)		0.156 (A)
129	AM_10225	rs78978552	10	106027073	GSTO1_c.636C>T(V212V)	0	C // T	A // B	1	0	NaN	N	snp	100	1			N/D		N/D
130	AM_10226	rs15032	10	106027087	GSTO1_c.650C>A(T217N)	0	A // C	A // B	0	1	NaN	N	snp	99.6	1			0.000 (A)		N/D
131	AM_10229	rs7589	10	106027165	GSTO1_c.*2G>A	0.028	A // G	A // B	0.028	0.972	NaN	N	snp	99.7	1			0.000 (A)		0.000 (A)
132	AM_10240	rs3813867	10	135339605	CYP2E1*5_-1293G>C(Promoter)	0.006	C // G	A // B	0.006	0.994	NaN	N	snp	100	1			0.067 (C )		0.289 (C )
133	AM_10241	rs2031920	10	135339845	CYP2E1*5_-1053C>T(Promoter)	0.004	C // T	A // B	0.996	0.004	NaN	N	snp	99.7	1			0.062 (T)		0.291 (T)
134	AM_10242	rs2070672	10	135340548	CYP2E1*7C_-352A>G(Promoter)	0.063	A // G	A // B	0.937	0.063	NaN	N	snp	99.9	1			0.035 (G)		0.221 (G)
135	AM_10243	rs2070673	10	135340567	CYP2E1*7_-333T>A(Promoter)	0.335	A // T	A // B	0.335	0.665	NaN	N	snp	100	1			0.167 (A)		0.467 (A)
136	AM_10244	rs6413420	10	135340829	CYP2E1*7B_-71G>T(Promoter)	0.12	G // T	A // B	0.88	0.12	NaN	N	snp	99.3	1			0.071 (T)		0.000 (T)
137	AM_10251	rs6413419	10	135345675	CYP2E1*4_4768G>A(V179I)	0.075	A // G	A // B	0.075	0.925	NaN	N	snp	100	1			0.022 (A)		0.000 (A)
138	AM_10253	rs915909	10	135347397	CYP2E1_6498C>T(I321I)	0.001	C // T	A // B	0.999	0.001	NaN	N	snp	100	1			0.000 (T)		0.000 (T)
139	AM_10257	rs55897648	10	135351264	CYP2E1*3_10023G>A(V389I)	0	A // G	A // B	0	1	NaN	N	snp	100	1			N/D		N/D
140	AM_10258	rs2515641	10	135351362	CYP2E1_10463T>C(F421F)	0.295	C // T	A // B	0.705	0.295	NaN	N	snp	100	1			0.128 (T)		0.155 (T)
141	AM_10260	rs8192690	11	17414570	ABCC8_c.4714G>A(V1572I)	0.078	A // G	A // B	0.078	0.922	NaN	N	snp	99.3	1			0.066 (A)		0.000 (A)
142	AM_10270	rs757110	11	17418477	ABCC8_c.4105T>G(S1369A)	0.19	G // T	A // B	0.19	0.81	NaN	N	snp	100	1			0.388 (A)		0.337 (G )
143	AM_10277	rs67706538	11	17428556	ABCC8_c.3041T>A(L1014X)	0	A // T	A // B	0	1	NaN	N	snp	99	1			0.000 (T)		0.000 (A)
144	AM_10281	rs72559722	11	17434263	ABCC8_c.2506C>T(R836X)	0	T // C	A // B	0	1	NaN	N	snp	99.7	1			N/D		N/D
145	AM_10285	rs72559724	11	17449428	ABCC8_c.2101_2102insT(I701X)	0	- // T	A // B	1	0	NaN	N	in-del	100	1			N/D		N/D
146	AM_10287	rs72559725	11	17450144	ABCC8_c.1891delC(P631X)	0	- // C	A // B	0	1	NaN	N	in-del	100	1			N/D		N/D
147	AM_10301	rs72559730	11	17483210	ABCC8_c.742C>T(R248X)	0	T // C	A // B	0	1	NaN	N	snp	100	1			N/D		N/D
148	AM_10321	rs895729	11	45679197	CHST1_c.-226-5041C>T	0.494	T // C	A // B	0.494	0.506	NaN	N	snp	99.6	1			0.416 (A)		0.081(A )
149	AM_10329	rs7129157	11	45691619	CHST1_4593G>T	0.014	T // G	A // B	0.014	0.986	NaN	N	snp	100	1			0.000 (A)		0.000 (A)
150	AM_10330	rs2028985	11	45695362	CHST1_8336G>A	0.009	G // A	A // B	0.991	0.009	NaN	N	snp	100	1			0.100 (T)		0.000 (T)
151	AM_10331	rs9787901	11	45696153	CHST1_9127C>T	0.191	T // C	A // B	0.191	0.809	NaN	N	snp	99.9	1			0.115 (A)		0.461 (A)
152	AM_10332	rs750397	11	45696973	CHST1_9947T>C	0.012	T // C	A // B	0.988	0.012	NaN	N	snp	100	1			0.000 (G)		0.000 (G)
153	AM_10333	rs750398	11	45697072	CHST1_10046G>C	0.491	G // C	A // B	0.509	0.491	NaN	N	snp	100	1			0.425 (G)		0.081 (G)
154	AM_10335	rs11568634	11	62746960	SLC22A6_c.1361G>A(R454Q)	0	G // A	A // B	1	0	NaN	N	snp	100	1			0.000 (A)		0.000 (A)
155	AM_10337	rs45607933	11	62748776	SLC22A6_c.877C>T(R293W)	0	C // T	A // B	1	0	NaN	N	snp	100	1			0.000 (T)		N/D
156	AM_10339	rs11568624	11	62749344	SLC22A6_c.767C>T(A256V)	0	C // T	A // B	1	0	NaN	N	snp	99.9	1			0.000 (T)		0.000 (T)
157	AM_10340	rs11568623	11	62749434	SLC22A6_c.677T>C(I226T)	0	T // C	A // B	1	0	NaN	N	snp	100	1			N/D		N/D
158	AM_10346	rs67264610	11	62751994	SLC22A6_c.169delC(L57X)	0	- // C	A // B	0	1	NaN	Y	in-del	99.9	1			0.005 (-)		N/D
159	AM_10347	rs11568626	11	62752014	SLC22A6_c.149G>A(R50H)	0.009	A // G	A // B	0.009	0.991	NaN	Y	snp	99.7	1			N/D		N/D
160	AM_10348	rs72559735	11	62752123	SLC22A6_c.40G>A(G14S)	0	G // A	A // B	1	0	NaN	N	snp	99.4	1			N/D		N/D
161	AM_10353	rs11568486	11	62761083	SLC22A8_c.1342G>A(V448I)	0	A // G	A // B	0	1	NaN	N	snp	100	1			0.004 (A)		0.000 (A)
162	AM_10354	rs11568497	11	62762035	SLC22A8_c.1195G>T(A399S)	0	G // T	A // B	1	0	NaN	N	snp	100	1			0.002 (T)		N/D
163	AM_10356	rs11568481	11	62763248	SLC22A8_c.929C>T(A310V)	0	T // C	A // B	0	1	NaN	N	snp	100	1			0.000 (T)		0.012 (T)
164	AM_10357	rs11568482	11	62763264	SLC22A8_c.913A>T(I305F)	0.001	T // A	A // B	0.001	0.999	NaN	N	snp	100	1			0.000 (T)		0.024 (T)
165	AM_10358	rs45438191	11	62763544	SLC22A8_c.842T>C(V281A)	0.005	T // C	A // B	0.995	0.005	NaN	N	snp	100	1			0.000 (G)		0.022 (G)
166	AM_10359	rs11568492	11	62763557	SLC22A8_c.829C>T(R277W)	0	C // T	A // B	1	0	NaN	N	snp	100	1			0.000 (T)		0.000 (T)
167	AM_10360	rs11568493	11	62763607	SLC22A8_c.779T>G(I260R)	0	G // T	A // B	0	1	NaN	N	snp	100	1			0.000 (G)		0.000 (G)
168	AM_10361	rs2276299	11	62766431	SLC22A8_c.723T>A(T241T)	0.159	T // A	A // B	0.841	0.159	NaN	N	snp	100	1			0.177 (T)		0.244 (T)
169	AM_10362	rs11568496	11	62766439	SLC22A8_c.715C>T(Q239X)	0	C // T	A // B	1	0	NaN	N	snp	100	1			N/D		N/D
170	AM_10364	rs45566039	11	62767307	SLC22A8_c.445C>A(R149S)	0	A // C	A // B	0	1	NaN	N	snp	100	1			N/D		N/D
171	AM_10365	rs11568479	11	62768242	SLC22A8_c.387C>A(F129L)	0	C // A	A // B	1	0	NaN	N	snp	100	1			0.000 (A)		0.012 (A)
172	AM_10378	rs11231819	11	64323557	SLC22A11_c.86T>C(L29P)	0	C // T	A // B	0	1	NaN	N	snp	99.4	1			N/D		N/D
173	AM_10379	rs11231820	11	64323562	SLC22A11_c.91A>G(I31V)	0	A // G	A // B	1	0	NaN	N	snp	100	1			0.000 (G)		0.000 (G)
174	AM_10384	rs12785832	11	64326677	SLC22A11_c.464T>G(V155G)	0	G // T	A // B	0	1	NaN	N	snp	99.6	1			0.000 (G)		0.023 (G)
175	AM_10388	rs34525500	11	64329590	SLC22A11_c.612T>G(A204A)	0	T // G	A // B	1	0	NaN	N	snp	100	1			N/D		N/D
176	AM_10389	rs1783811	11	64333296	SLC22A11_c.1058+487G>A	0.234	A // G	A // B	0.234	0.766	NaN	N	snp	100	1			0.306 (A)		0.275 (A)
177	AM_10390	rs2078267	11	64334114	SLC22A11_c.1059-957C>T	0.453	C // T	A // B	0.547	0.453	NaN	N	snp	99.9	1			0.465 (G)		0.035 (A)
178	AM_10396	rs72559738	11	64359079	SLC22A12_c.51G>A(Q17Q)	0	A // G	A // B	0	1	NaN	N	snp	100	1			N/D		N/D
179	AM_10401	rs11231825	11	64360274	SLC22A12_c.426T>C(H142H)	0.387	C // T	A // B	0.613	0.387	NaN	N	snp	100	1			0.274 (T)		0.256 ©
180	AM_10409	rs8187659	11	66131722	SLC29A2_c.1233G>A(V411V)	0.001	A // G	A // B	0.001	0.999	NaN	N	snp	100	1			0.000 (A)		0.000 (A)
181	AM_10410	rs8187661	11	66133643	SLC29A2_c.927C>T(P309P)	0.006	C // T	A // B	0.994	0.006	NaN	N	snp	100	1			N/D		0.011 (G)
182	AM_10412	rs8187649	11	66135335	SLC29A2_c.551_556del6(SGV186X)	0	- // GTGGCG	A // B	0	1	NaN	N	in-del	100	1			N/D		N/D
183	AM_10417	rs8187647	11	66136658	SLC29A2_c.288G>A(T96T)	0	G // A	A // B	1	0	NaN	N	snp	100	1			0.000 (A)		N/D
184	AM_10418	rs8187644	11	66136911	SLC29A2_c.204C>A(N68K)	0	A // C	A // B	0	1	NaN	N	snp	100	1			0.000 (A)		0.000 (A)
185	AM_10419	rs8187645	11	66136938	SLC29A2_c.177G>A(T59T)	0	G // A	A // B	1	0	NaN	N	snp	100	1			N/D		N/D
186	AM_10430	rs8191439	11	67351297	GSTP1_c.-18G>A(Promoter)	0	A // G	A // B	0	1	NaN	N	snp	95	1			0.009 (A)		0.024 (A)
187	AM_10434	rs8191444	11	67351624	GSTP1_c.21C>G(V7V)	0	C // G	A // B	1	0	NaN	N	snp	100	1			0.000 (G)		0.000 (G)
188	AM_10440	rs1695	11	67352689	GSTP1*B_c.313A>G(I105V)	0.355	A // G	A // B	0.645	0.355	NaN	N	snp	100	1			0.407 (G)		0.174 (G)
189	AM_10442	rs1138272	11	67353579	GSTP1*C_c.341C>T(A114V)	0.114	C // T	A // B	0.886	0.114	NaN	N	snp	100	1			0.097 (T)		0.000 (T)
190	AM_10444	rs4986949	11	67353677	GSTP1_c.439G>T(D147Y)	0	G // T	A // B	1	0	NaN	N	snp	100	1			0.000 (T)		0.012 (T)
191	AM_10454	rs1109407	11	74876951	SLCO2B1_c.405G>A(P135P)	0.011	A // G	A // B	0.011	0.989	NaN	N	snp	100	1			0.004 (A)		N/D
192	AM_10456	rs72559740	11	74880413	SLCO2B1_c.644A>T(D215V)	0	T // A	A // B	0	1	NaN	N	snp	99.9	1			N/D		N/D
193	AM_10458	rs1621378	11	74904362	SLCO2B1*2_c.1175C>T(T392I)	0	T // C	A // B	0	1	NaN	N	snp	100	1			0.000 (A)		0.012 (A)
194	AM_10460	rs2306167	11	74907421	SLCO2B1_c.1434-138G>T	0.028	G // T	A // B	0.972	0.028	NaN	N	snp	100	1			0.042 (T)		0.042 (T)
195	AM_10462	rs59305495	11	74907637	SLCO2B1_c.1512C>T(C504C)	0	C // T	A // B	1	0	NaN	N	snp	100	1			N/D		N/D
196	AM_10470	rs11557218	11	114167240	NNMT_c.-39A>G	0	A // G	A // B	1	0	NaN	N	snp	100	1			N/D		N/D
197	AM_10471	rs1802605	11	114167344	NNMT_c.66A>G(E22E)	0	A // G	A // B	1	0	NaN	N	snp	100	1			N/D		N/D
198	AM_10472	rs1802606	11	114167384	NNMT_c.106C>A(Q36K)	0	A // C	A // B	0	1	NaN	N	snp	100	1			N/D		N/D
199	AM_10473	rs2852425	11	114182507	NNMT_c.363-260T>C	0.364	T // C	A // B	0.636	0.364	NaN	N	snp	100	1			0.217 (G)		0.217 (G)
200	AM_10474	rs3741303	11	114182607	NNMT_c.363-160C>T	0.056	T // C	A // B	0.056	0.944	NaN	N	snp	100	1			0.004 (T)		0.047 (T)
201	AM_10477	rs72559741	11	114182871	NNMT_c.467_468ins2(P156X)	0	- // CG	A // B	1	0	NaN	N	in-del	100	1			N/D		N/D
202	AM_10478	rs1050207	11	114183137	NNMT_c.733A>C(T245P)	0	A // C	A // B	1	0	NaN	N	snp	100	1			0.000 (C )		N/D
203	AM_10481	rs4149117	12	21011480	SLCO1B3_c.334G>T(A112S)	0.166	G // T	A // B	0.834	0.166	NaN	N	snp	99.7	1			0.142 (T)		0.291 (T)
204	AM_10482	rs7311358	12	21015760	SLCO1B3_c.699A>G(I233M)	0.167	A // G	A // B	0.833	0.167	NaN	N	snp	100	1			0.119 (G)		0.256 (G)
205	AM_10484	N/A	12	21028282	SLCO1B3_c.841delA(K281X)	0	- // A	A // B	0	1	NaN	N	in-del	99.7	1
206	AM_10485	rs4149143	12	21032506	SLCO1B3_c.1272A>G(L424L)	0	A // G	A // B	1	0	NaN	N	snp	100	1			N/D		0.000 (G)
207	AM_10487	rs2053098	12	21036411	SLCO1B3_c.1557G>A(A519A)	0.165	A // G	A // B	0.165	0.835	NaN	N	snp	99.9	1			0.125 (A)		0.250 (A)
208	AM_10490	rs3764006	12	21054369	SLCO1B3_c.1833A>G(G611G)	0.156	G // A	A // B	0.156	0.844	NaN	N	snp	100	1			0.102 (C )		0.321 (C )
209	AM_10492	rs72559744	12	21069155	SLCO1B3_c.2083insC	0	- // C	A // B	1	0	NaN	N	in-del	100	1			N/D		N/D
210	AM_10493	rs4149015	12	21283322	SLCO1B1*17_c.-11187G>A(Promoter)	0.077	A // G	A // B	0.077	0.923	NaN	N	snp	100	1			0.058 (A)		0.108 (A)
211	AM_10494	rs56101265	12	21325716	SLCO1B1*2_c.217T>C(F73L)	0	C // T	A // B	0	1	NaN	N	snp	100	1			N/D		N/D
212	AM_10495	rs56061388	12	21327529	SLCO1B1_c.245T>C(V82A)	0	C // T	A // B	0	1	NaN	N	snp	100	1			N/D		N/D
213	AM_10496	rs2306283	12	21329738	SLCO1B1*1B_c.388A>G(N130D)	0.478	G // A	A // B	0.522	0.478	NaN	N	snp	99.9	1			0.403 (C )		0.163 (T)
214	AM_10497	rs2306282	12	21329802	SLCO1B1*16_c.452A>G(N151S)	0	A // G	A // B	1	0	NaN	N	snp	99.4	1			0.000 (C )		0.000 (C )
215	AM_10498	rs11045819	12	21329813	SLCO1B1*4_c.463C>A(P155T)	0.116	A // C	A // B	0.116	0.884	NaN	N	snp	91.4	1			0.190 (A)		0.110 (A)
216	AM_10499	rs72559745	12	21329817	SLCO1B1*3_c.467A>G(E156G)	0	A // G	A // B	1	0	NaN	N	snp	100	1			N/D		N/D
217	AM_10500	rs4149056	12	21331549	SLCO1B1*5_c.521T>C(V174A)	0.27	C // T	A // B	0.27	0.73	NaN	N	snp	99.1	1			0.150 (C )		0.151 (C )
218	AM_10501	rs4149057	12	21331599	SLCO1B1_c.571T>C(L191L)	0.471	T // C	A // B	0.529	0.471	NaN	N	snp	100	1			0.332 (T)		0.151 (C )
219	AM_10502	rs72559746	12	21331606	SLCO1B1*18_c.578T>G(L193R)	0	T // G	A // B	1	0	NaN	N	snp	100	1			N/D		N/D
220	AM_10503	rs2291075	12	21331625	SLCO1B1_c.597C>T(F199F)	0.476	C // T	A // B	0.524	0.476	NaN	N	snp	100	1			0.398 (T)		0.430 (C )
221	AM_10508	rs72559747	12	21353478	SLCO1B1_c.1007C>G(P336R)	0	C // G	A // B	1	0	NaN	N	snp	100	1			N/D		N/D
222	AM_10509	rs55901008	12	21353529	SLCO1B1*6_c.1058T>C(I353T)	0	T // C	A // B	1	0	NaN	N	snp	100	1			N/D		N/D
223	AM_10512	rs56387224	12	21355583	SLCO1B1*7_c.1294A>G(N432D)	0	A // G	A // B	1	0	NaN	N	snp	100	1			N/D		N/D
224	AM_10513	rs72559748	12	21358855	SLCO1B1*8_c.1385A>G(D462G)	0	A // G	A // B	1	0	NaN	N	snp	100	1			N/D		N/D
225	AM_10514	rs59502379	12	21358933	SLCO1B1*9_c.1463G>C(G488A)	0.001	C // G	A // B	0.001	0.999	NaN	N	snp	100	1			0.000 (C )		N/D
226	AM_10516	rs56199088	12	21392011	SLCO1B1*10_c.1964A>G(D655G)	0	A // G	A // B	1	0	NaN	N	snp	100	1			N/D		N/D
227	AM_10517	rs55737008	12	21392047	SLCO1B1*11_c.2000A>G(E667G)	0	A // G	A // B	1	0	NaN	N	snp	100	1			N/D		N/D
228	AM_10518	rs11568557	12	21422492	SLCO1A2_c.2003C>G(T668S)	0.006	C // G	A // B	0.994	0.006	NaN	N	snp	100	1			0.000 (G )		0.000 (G )
229	AM_10524	rs45628437	12	21450350	SLCO1A2_c.1063A>G(I355V)	0	A // G	A // B	1	0	NaN	N	snp	100	1			0.005 (G)		N/D
230	AM_10525	rs11568579	12	21450445	SLCO1A2_c.968T>C(L323P)	0	C // T	A // B	0	1	NaN	N	snp	100	1			0.000 (C )		0.000 (C )
231	AM_10526	rs11568551	12	21453351	SLCO1A2_c.841A>G(I281V)	0	A // G	A // B	1	0	NaN	N	snp	100	1			0.000 (G )		0.000 (G )
232	AM_10527	rs11568555	12	21453359	SLCO1A2_c.833delA(N278X)	0	- // A	A // B	0	1	NaN	N	in-del	100	1			N/D		N/D
233	AM_10528	rs11568553	12	21453362	SLCO1A2_c.830C>A(T277N)	0	A // C	A // B	0	1	NaN	N	snp	100	1			N/D		N/D
234	AM_10531	rs11568563	12	21457434	SLCO1A2_c.516A>C(E172D)	0.022	A // C	A // B	0.978	0.022	NaN	N	snp	100	1			0.083 (C )		0.000 (C )
235	AM_10532	rs11568564	12	21457448	SLCO1A2_c.502C>T(R168C)	0	C // T	A // B	1	0	NaN	N	snp	100	1			0.004 (T)		0.012 (T)
236	AM_10533	rs45502302	12	21459854	SLCO1A2_c.404A>T(N135I)	0	A // T	A // B	1	0	NaN	N	snp	100	1			N/D		N/D
237	AM_10534	rs11568567	12	21459876	SLCO1A2_c.382A>T(N128Y)	0	A // T	A // B	1	0	NaN	N	snp	100	1			0.000 (T)		0.000 (T)
238	AM_10536	rs7312628	12	21475091	SLCO1A2_c.61-3234G>A	0.024	G // A	A // B	0.976	0.024	NaN	N	snp	99.9	1			N/D		N/D
239	AM_10537	rs7298982	12	21475627	SLCO1A2_c.61-3770A>G	0.003	A // G	A // B	0.997	0.003	NaN	N	snp	100	1			0.000 (C )		0.000 (C )
240	AM_10538	rs7484455	12	21476591	SLCO1A2_c.61-4734C>T	0	T // C	A // B	0	1	NaN	N	snp	100	1			0.000 (A )		0.000 (A )
241	AM_10539	rs4078	12	21476983	SLCO1A2_c.61-5126T>C	0.096	C // T	A // B	0.096	0.904	NaN	N	snp	100	1			0.142 (G)		0.000 (G )
242	AM_10540	rs7957203	12	21477462	SLCO1A2_c.61-5605T>A	0.296	T // A	A // B	0.704	0.296	NaN	N	snp	100	1			0.267 (T)		0.341 (T)
243	AM_10542	rs10841795	12	21487544	SLCO1A2_c.38T>C(I13T)	0.088	T // C	A // B	0.912	0.088	NaN	N	snp	100	1			0.108 (G)		0.011 (G)
244	AM_10546	rs72559751	12	21958221	ABCC9_c.4537G>A(A1513T)	0	G // A	A // B	1	0	NaN	N	snp	100	1			N/D		N/D
245	AM_10554	rs61001398	12	22040823	ABCC9_c.1848C>T(D616D)	0.009	T // C	A // B	0.009	0.991	NaN	N	snp	100	1			0.001 (A)		N/D
246	AM_10555	rs10770865	12	22063115	ABCC9_c.1296C>T(P432P)	0	C // T	A // B	1	0	NaN	N	snp	100	1			0.000 (A)		0.000 (A)
247	AM_10556	rs72559752	12	22063889	ABCC9_c.1035G>A(K345K)	0	G // A	A // B	1	0	NaN	N	snp	100	1			N/D		N/D
248	AM_10557	rs58386780	12	22068629	ABCC9_c.789C>T(C263C)	0.007	T // C	A // B	0.007	0.993	NaN	N	snp	100	1			0.004 (A)		N/D
249	AM_10558	rs17846788	12	22068749	ABCC9_c.669G>T(L223L)	0	G // T	A // B	1	0	NaN	N	snp	100	1			0.000 (T)		N/D
250	AM_10559	rs8176351	12	58156510	CYP27B1_4315G>A	0.012	A // G	A // B	0.012	0.988	NaN	N	snp	100	1			0.000 (A)		0.000 (A)
251	AM_10560	rs8176350	12	58156848	CYP27B1_3977G>A	0.004	A // G	A // B	0.004	0.996	NaN	N	snp	99.9	1			0.000 (A)		N/D
252	AM_10561	rs8176349	12	58157000	CYP27B1_3825G>A(A484A)	0	G // A	A // B	1	0	NaN	N	snp	100	1			0.005 (A)		N/D
253	AM_10563	rs2229103	12	58158176	CYP27B1_2649T>C(V374A)	0	T // C	A // B	1	0	NaN	N	snp	100	1			N/D		N/D
254	AM_10564	rs13377933	12	58158230	CYP27B1_2595G>A(S356N)	0	A // G	A // B	0	1	NaN	N	snp	100	1			N/D		N/D
255	AM_10565	rs28934606	12	58158293	CYP27B1_2532G>C(R335P)	0	C // G	A // B	0	1	NaN	N	snp	100	1			N/D		N/D
256	AM_10566	rs8176345	12	58158558	CYP27B1_2267G>A(L314L)	0.014	A // G	A // B	0.014	0.986	NaN	N	snp	100	1			0.053 (A)		0.000 (A)
257	AM_10567	rs8176344	12	58159173	CYP27B1_1652G>C(V166L)	0.004	C // G	A // B	0.004	0.996	NaN	N	snp	100	1			0.000 (C )		0.000 (C )
258	AM_10568	rs7965963	12	58159210	CYP27B1_1615C>T(R153R)	0	T // C	A // B	0	1	NaN	N	snp	100	1			0.000 (A)		N/D
259	AM_10571	rs12823260	12	58164992	METTL1_c.159C>G(F53L)	0	G // C	A // B	0	1	NaN	N	snp	100	1			N/D		N/D
260	AM_10572	rs11546004	12	58165790	METTL1_c.77A>G(H26R)	0	A // G	A // B	1	0	NaN	N	snp	100	1			N/D		N/D
261	AM_10573	rs2468110	12	105152391	CHST11_c.*810A>G	0.265	G // A	A // B	0.735	0.265	NaN	N	snp	100	1			0.301 (A)		0.407 (A)
262	AM_10574	rs1565814	12	105152960	CHST11_c.*1379A>G	0.042	A // G	A // B	0.958	0.042	NaN	N	snp	100	1			0.016 (G)		0.192 (G)
263	AM_10575	rs2463018	12	105152997	CHST11_c.*1416T>C	0.23	C // T	A // B	0.77	0.23	NaN	N	snp	100	1			0.288 (A)		0.314 (A)
264	AM_10576	rs903247	12	105153570	CHST11_c.*1989C>T	0.314	C // T	A // B	0.314	0.686	NaN	N	snp	100	1			0.301 (C )		0.337 (C )
265	AM_10577	rs2463437	12	105154087	CHST11_c.*2506G>A	0.272	G // A	A // B	0.272	0.728	NaN	N	snp	100	1			0.292 (C )		0.407 (C )
266	AM_10579	rs7847	12	105155605	CHST11_c.*4024C>T	0.232	C // T	A // B	0.232	0.768	NaN	N	snp	100	1			0.275 (C )		0.283 (C )
267	AM_10580	rs1048662	12	105155627	CHST11_c.*4046A>G	0.07	A // G	A // B	0.93	0.07	NaN	N	snp	100	1			0.009 (G)		0.256 (G)
268	AM_10581	rs886205	12	112204427	ALDH2_c.-360G>A	0.443	G // A	A // B	0.443	0.557	NaN	N	snp	100	1			0.204 (C )		0.058 (T )
269	AM_10582	rs13306164	12	112221055	ALDH2_c.313C>T(L105L)	0	T // C	A // B	0	1	NaN	N	snp	99.7	1			0.000 (T)		0.011 (T)
270	AM_10583	rs58280059	12	112228249	ALDH2_c.564G>A(P188P)	0	A // G	A // B	0	1	NaN	N	snp	100	1			N/D		N/D
271	AM_10584	rs1062136	12	112230513	ALDH2_c.1010A>T(E337V)	0	A // T	A // B	1	0	NaN	N	snp	100	1			0.000 (T)		0.011 (T)
272	AM_10585	rs1064933	12	112241723	ALDH2_c.1467G>A(G489G)	0	A // G	A // B	0	1	NaN	N	snp	100	1			N/D		N/D
273	AM_10586	rs671	12	112241766	ALDH2_c.1510G>A(E504K)	0.004	G // A	A // B	0.996	0.004	NaN	N	snp	100	1			0.000 (G)		0.155 (A)
274	AM_10588	rs1051332	13	52507720	ATP7B_c.*1172G>A	0.461	A // G	A // B	0.461	0.539	NaN	N	snp	99.6	1			0.408 (A)		0.367 (A)
275	AM_10589	rs7334118	13	52513266	ATP7B_c.3620A>G(H1207R)	0.009	G // A	A // B	0.009	0.991	NaN	N	snp	97	1			0.009 (C )		N/D
276	AM_10590	rs1801249	13	52515354	ATP7B_c.3419T>C(V1140A)	0.294	T // C	A // B	0.294	0.706	NaN	N	snp	100	1			0.475 (T)		0.389 C )
277	AM_10591	rs1801246	13	52520507	ATP7B_c.2973G>A(T991T)	0.015	A // G	A // B	0.015	0.985	NaN	N	snp	98.1	1			0.075 (A)		N/D
278	AM_10592	rs732774	13	52523808	ATP7B_c.2855G>A(R952K)	0.295	A // G	A // B	0.705	0.295	NaN	N	snp	100	1			0.438 (G)		0.360 (A)
279	AM_10593	rs1061472	13	52524488	ATP7B_c.2495A>G(K832R)	0.3	A // G	A // B	0.3	0.7	NaN	N	snp	100	1			0.447 (A)		0.360 (G)
280	AM_10594	rs2277447	13	52534376	ATP7B_c.2029G>A(E677K)	0	G // A	A // B	1	0	NaN	N	snp	100	1			0.000 (T)		0.000 (T)
281	AM_10595	rs1801244	13	52544805	ATP7B_c.1366G>C(V456L)	0.499	C // G	A // B	0.501	0.499	NaN	N	snp	100	1			0.482 (C )		0.488 (C )
282	AM_10596	rs1801243	13	52548140	ATP7B_c.1216T>G(S406A)	0.481	G // T	A // B	0.481	0.519	NaN	N	snp	100	1			0.487 (G)		0.430 (T)
283	AM_10597	rs2277448	13	52585548	ATP7B_c.-75C>A	0.268	C // A	A // B	0.268	0.732	NaN	N	snp	100	1			0.383 (G)		0.422 (G)
284	AM_10598	rs4148555	13	95672265	ABCC4_c.*1564A>T	0.001	A // T	A // B	0.999	0.001	NaN	N	snp	100	1			0.000 (T)		0.000 (T)
285	AM_10599	rs1059754	13	95672478	ABCC4_c.*1351T>C	0	C // T	A // B	0	1	NaN	N	snp	99.9	1			N/D		N/D
286	AM_10600	rs4148554	13	95672547	ABCC4_c.*1282T>C	0	C // T	A // B	0	1	NaN	N	snp	100	1			0.000 (C )		0.000 (C )
287	AM_10601	rs1059751	13	95672950	ABCC4_c.*879T>C	0.343	C // T	A // B	0.343	0.657	NaN	N	snp	100	1			0.015 (C )		0.430 (C )
288	AM_10602	rs4148553	13	95673135	ABCC4_c.*694G>A	0.345	A // G	A // B	0.345	0.655	NaN	N	snp	100	1			0.427 (A)		0.430 (A)
289	AM_10603	rs4148551	13	95673518	ABCC4_c.*311G>A	0.476	A // G	A // B	0.524	0.476	NaN	N	snp	100	1			0.473 (G)		429 (A)
290	AM_10604	rs3742106	13	95673791	ABCC4_c.*38T>G	0.451	G // T	A // B	0.451	0.549	NaN	N	snp	99.4	1			0.473 (C )		0.430 (C )
291	AM_10617	rs1189466	13	95726541	ABCC4_c.2844C>T(F948F)	0.045	C // T	A // B	0.955	0.045	NaN	N	snp	100	1			0.044 (A)		0.174 (A)
292	AM_10618	rs1678339	13	95727780	ABCC4_c.2712G>A(L904L)	0.05	G // A	A // B	0.95	0.05	NaN	N	snp	100	1			0.044 (T)		0.179 (T)
293	AM_10622	rs3765534	13	95815415	ABCC4_c.2269G>A(E757K)	0.001	G // A	A // B	0.999	0.001	NaN	N	snp	100	1			0.013 (T)		0.083 (T)
294	AM_10624	rs72559753	13	95818554	ABCC4_c.1892delT(L631X)	0	- // T	A // B	0	1	NaN	N	in-del	100	1			N/D		N/D
295	AM_10632	rs2274405	13	95858978	ABCC4_c.969G>A(S323S)	0.483	G // A	A // B	0.483	0.517	NaN	N	snp	100	1			0.398 (T)		0.419 (T)
296	AM_10633	rs2274406	13	95858996	ABCC4_c.951A>G(R317R)	0.431	G // A	A // B	0.431	0.569	NaN	N	snp	100	1			0.398 (T)		0.432 (T)
297	AM_10634	rs2274407	13	95859035	ABCC4_c.912G>T(K304N)	0.122	G // T	A // B	0.878	0.122	NaN	N	snp	100	1			0.025 (A)		0.156 (A)
298	AM_10640	rs4148460	13	95886884	ABCC4_c.511T>G(C171G)	0	G // T	A // B	0	1	NaN	N	snp	100	1			0.000 (G)		0.000 (G)
299	AM_10641	rs8187840	13	99338531	SLC15A1_c.1848G>A(S616S)	0	G // A	A // B	1	0	NaN	N	snp	100	1			0.068 (A)		0.000 (A)
300	AM_10642	rs56120058	13	99339905	SLC15A1_c.1757C>T(P586L)	0	C // T	A // B	1	0	NaN	N	snp	100	1			N/D		N/D
301	AM_10643	rs8187830	13	99340576	SLC15A1_c.1609C>T(P537S)	0	T // C	A // B	0	1	NaN	N	snp	100	1			0.005 (T)		0.000 (T)
302	AM_10644	rs8187832	13	99340771	SLC15A1_c.1527C>T(N509N)	0.128	C // T	A // B	0.872	0.128	NaN	N	snp	100	1			0.035 (T)		0.000 (T)
303	AM_10645	rs8187828	13	99354754	SLC15A1_c.1446A>G(E482E)	0.001	A // G	A // B	0.999	0.001	NaN	N	snp	99.9	1			N/D		N/D
304	AM_10647	rs2274827	13	99356584	SLC15A1_c.1375C>T(R459C)	0	T // C	A // B	0	1	NaN	N	snp	100	1			0.009 (A)		0.064 (A)
305	AM_10648	rs8187838	13	99356607	SLC15A1_c.1352C>A(T451N)	0.043	A // C	A // B	0.043	0.957	NaN	N	snp	86.2	1			0.035 (A)		0.012 (A)
306	AM_10649	rs2274828	13	99356611	SLC15A1_c.1348G>A(V450I)	0.009	G // A	A // B	0.991	0.009	NaN	N	snp	100	1			0.217 (T)		0.071 (T)
307	AM_10650	rs1339067	13	99356612	SLC15A1_c.1347T>C(A449A)	0.279	C // T	A // B	0.721	0.279	NaN	N	snp	94.5	1			0.358 (T)		0.244 (C )
308	AM_10651	rs72547504	13	99356637	SLC15A1_c.1321insT	0	- // T	A // B	1	0	NaN	N	in-del	100	1			N/D		N/D
309	AM_10652	rs4646227	13	99358401	SLC15A1_c.1256G>C(G419A)	0.074	C // G	A // B	0.074	0.926	NaN	N	snp	91.2	1			0.017 (C )		0.102 (C )
310	AM_10653	rs8187836	13	99358478	SLC15A1_c.1179C>T(N393N)	0	C // T	A // B	1	0	NaN	N	snp	100	1			0.000 (T)		0.000 (T)
311	AM_10658	rs8187821	13	99376180	SLC15A1_c.351C>A(S117R)	0.001	C // A	A // B	0.999	0.001	NaN	N	snp	100	1			0.005 (A)		0.105 (A)
312	AM_10659	rs2297322	13	99376181	SLC15A1_c.350G>A(S117N)	0.299	A // G	A // B	0.299	0.701	NaN	N	snp	72.8	1			0.115 (T)		0.357 (T)
313	AM_10660	rs8187822	13	99376201	SLC15A1_c.330C>T(N110N)	0	T // C	A // B	0	1	NaN	N	snp	100	1			N/D		N/D
314	AM_10661	rs8187823	13	99376273	SLC15A1_c.258G>A(S86S)	0.001	A // G	A // B	0.001	0.999	NaN	N	snp	100	1			N/D		N/D
315	AM_10662	rs8187817	13	99378642	SLC15A1_c.83T>A(F28Y)	0	A // T	A // B	0	1	NaN	N	snp	100	1			0.000 (A)		0.000 (A)
316	AM_10663	rs8187818	13	99378664	SLC15A1_c.61G>A(V21I)	0	A // G	A // B	0	1	NaN	N	snp	100	1			0.000 (T)		0.000 (T)
317	AM_10664	rs8187819	13	99378743	SLC15A1_c.22-40G>C	0	C // G	A // B	0	1	NaN	N	snp	100	1			0.000 (G)		0.000 (G)
318	AM_10666	rs3803258	13	103696987	SLC10A2_c.*1496A>G	0.174	G // A	A // B	0.174	0.826	NaN	N	snp	100	1			0.177 (C )		0.186 (C )
319	AM_10671	rs2301159	13	103697728	SLC10A2_c.*755C>T	0.228	C // T	A // B	0.772	0.228	NaN	N	snp	100	1			0.162 (T)		0.279 (T)
320	AM_10672	rs279942	13	103698110	SLC10A2_c.*373C>G	0.18	C // G	A // B	0.82	0.18	NaN	N	snp	100	1			0.183 (G)		0.267 (G)
321	AM_10673	rs279941	13	103698168	SLC10A2_c.*315G>T	0.119	T // G	A // B	0.119	0.881	NaN	N	snp	99.6	1			0.155 (T)		0.314 (T)
322	AM_10675	rs2301157	13	103698363	SLC10A2_c.*120T>C	0.499	T // C	A // B	0.501	0.499	NaN	N	snp	100	1			0.467 (T)		0.378 (T)
323	AM_10678	rs188096	13	103705044	SLC10A2_c.511G>T(A171S)	0.118	G // T	A // B	0.882	0.118	NaN	N	snp	100	1			0.155 (A)		0.314 (A)
324	AM_10681	rs157381	13	103710684	SLC10A2_c.426G>A(P142P)	0.004	G // A	A // B	0.996	0.004	NaN	N	snp	100	1			0.000 (T)		0.000 (T)
325	AM_10686	rs7987433	13	103719056	SLC10A2_c.-457A>G	0.231	G // A	A // B	0.231	0.769	NaN	N	snp	100	1			0.128 (C )		0.116 (C )
326	AM_10687	rs1061040	14	23242828	SLC7A7_c.1527G>A(K509K)	0.151	A // G	A // B	0.151	0.849	NaN	N	snp	97.7	1			0.117 (A)		0.122 (A)
327	AM_10690	rs11568432	14	23248074	SLC7A7_c.698A>G(Y233C)	0	A // G	A // B	1	0	NaN	N	snp	100	1			0.004 (G)		0.000 (G)
328	AM_10691	rs1805061	14	23248112	SLC7A7_c.660T>C(G220G)	0.083	T // C	A // B	0.917	0.083	NaN	N	snp	80.7	1			0.168 (C )		0.291 (C )
329	AM_10692	rs8018462	14	23282110	SLC7A7_c.498C>T(I166I)	0.44	T // C	A // B	0.56	0.44	NaN	N	snp	100	1			0.5		0.187 (A)
330	AM_10694	rs8016634	14	23282152	SLC7A7_c.456C>T(F152F)	0.014	C // T	A // B	0.986	0.014	NaN	N	snp	100	1			0.004 (A)		N/D
331	AM_10696	rs1805059	14	23282449	SLC7A7_c.159A>G(S53S)	0.453	G // A	A // B	0.453	0.547	NaN	N	snp	100	1			0.398 (G)		0.186 (G)
332	AM_10697	rs2281677	14	23284572	SLC7A7_c.-86C>T	0.456	C // T	A // B	0.544	0.456	NaN	N	snp	100	1			0.407 (T)		0.279 (T)
333	AM_10698	rs2236135	14	23595721	SLC7A8_c.*665T>C	0.2	T // C	A // B	0.8	0.2	NaN	N	snp	100	1			0.142 (C )		0.430 (C )
334	AM_10709	rs910795	14	23632506	SLC7A8_c.508+1988T>C	0.209	T // C	A // B	0.791	0.209	NaN	N	snp	100	1			0.146 (C ) )		0.395 (C )
335	AM_10710	rs2268877	14	23636757	SLC7A8_c.152-1008T>C	0.187	C // T	A // B	0.187	0.813	NaN	N	snp	100	1			0.204 (C )		0.477 (T)
336	AM_10711	rs2268873	14	23640794	SLC7A8_c.152-5045T>C	0.179	C // T	A // B	0.179	0.821	NaN	N	snp	100	1			0.221 (C )		0.465 (T)
337	AM_10712	rs8013529	14	23649792	SLC7A8_c.151+2181T>C	0.095	T // C	A // B	0.905	0.095	NaN	N	snp	100	1			0.088 (G)		0.012 (G)
338	AM_10713	rs1884545	14	23652004	SLC7A8_c.120C>T(I40I)	0.098	C // T	A // B	0.902	0.098	NaN	N	snp	100	1			0.088 (T)		0.012 (T)
339	AM_10714	rs7141505	14	23653188	SLC7A8_c.-1065T>G	0.482	T // G	A // B	0.518	0.482	NaN	N	snp	100	1			0.288 (C )		0.186 (C )
340	AM_10715	rs56903885	14	70243089	SLC10A1_c.960C>A(I320I)	0.001	C // A	A // B	0.999	0.001	NaN	N	snp	100	1			0.000 (T)		N/D
341	AM_10716	rs72547506	14	70245053	SLC10A1_c.940A>G(K314E)	0	G // A	A // B	0	1	NaN	N	snp	100	1			N/D		N/D
342	AM_10717	rs72547507	14	70245157	SLC10A1_c.836T>C(I279T)	0	T // C	A // B	1	0	NaN	N	snp	100	1			N/D		N/D
343	AM_10718	rs2296651	14	70245193	SLC10A1_c.800C>T(S267F)	0.001	T // C	A // B	0.001	0.999	NaN	N	snp	100	1			0.000 (A)		0.024 (A)
344	AM_10719	rs61745930	14	70245977	SLC10A1_c.668T>C(I223T)	0	T // C	A // B	1	0	NaN	N	snp	100	1			N/D		N/D
345	AM_10720	rs55645214	14	70246018	SLC10A1_c.627T>C(N209N)	0.017	T // C	A // B	0.983	0.017	NaN	N	snp	100	1			0.016 (G)		0.000 (G)
346	AM_10722	rs4646285	14	70263648	SLC10A1_c.225G>A(T75T)	0.058	G // A	A // B	0.942	0.058	NaN	N	snp	100	1			0.106 (A)		0.116 (A)
347	AM_10724	rs7975	14	77793207	GSTZ1_c.94G>A(E32K)	0.234	G // A	A // B	0.766	0.234	NaN	N	snp	100	1			0.288 (A)		0.488 (A)
348	AM_10725	rs7972	14	77793237	GSTZ1_c.124G>A(G42R)	0.023	G // A	A // B	0.977	0.023	NaN	N	snp	99.9	1			0.088 (A)		0.000 (A)
349	AM_10726	rs1046428	14	77794283	GSTZ1_c.245C>T(T82M)	0.207	C // T	A // B	0.793	0.207	NaN	N	snp	99.7	1			0.191 (T)		0.081 (T)
350	AM_10727	rs2234955	14	77795520	GSTZ1_c.397A>C(N133H)	0	C // A	A // B	0	1	NaN	N	snp	99.9	1			0.000 (C )		0.012 (C )
351	AM_10728	rs15506	14	100193559	CYP46A1_42805G>A	0	G // A	A // B	1	0	NaN	N	snp	100	1			N/D		N/D
352	AM_10730	rs1060896	15	45554267	SLC28A2_c.225C>A(S75R)	0.461	A // C	A // B	0.461	0.539	NaN	N	snp	99.9	1			0.335 (C )		0.093 (A)
353	AM_10731	rs2271437	15	45556120	SLC28A2_c.488T>G(L163W)	0	G // T	A // B	0	1	NaN	N	snp	100	1			0.000 (G)		0.036 (G)
354	AM_10732	rs8023604	15	45556163	SLC28A2_c.531T>C(F177F)	0.04	C // T	A // B	0.04	0.96	NaN	N	snp	99.7	1			0.000 (C )		0.000 (C )
355	AM_10733	rs10519020	15	45557318	SLC28A2_c.734G>C(S245T)	0.009	C // G	A // B	0.009	0.991	NaN	N	snp	100	1			0.000 (C )		0.000 (C )
356	AM_10734	rs17222036	15	45559703	SLC28A2_c.993T>A(S331S)	0	A // T	A // B	0	1	NaN	N	snp	100	1			0.000 (A)		N/D
357	AM_10735	rs17215633	15	45559774	SLC28A2_c.1064T>C(F355S)	0	C // T	A // B	0	1	NaN	N	snp	100	1			0.000 (C )		0.000 (C )
358	AM_10739	rs9635306	15	45561693	SLC28A2_c.1526G>A(G509E)	0	A // G	A // B	0	1	NaN	N	snp	100	1			0.000 (A)		0.012 (A)
359	AM_10740	rs1050787	15	51502082	CYP19A1_33028T>A(3'UTR)	0	A // T	A // B	0	1	NaN	N	snp	100	1			N/D		N/D
360	AM_10741	rs1050760	15	51502298	CYP19A1_32812T>C(3'UTR)	0	C // T	A // B	0	1	NaN	N	snp	100	1			0.000 (C )		N/D
361	AM_10742	rs4646	15	51502844	CYP19A1_32266G>T(3'UTR)	0.233	T // G	A // B	0.233	0.767	NaN	N	snp	100	1			0.235 (A)		0.279 (A)
362	AM_10743	rs1050677	15	51502893	CYP19A1_32217C>A(3'UTR)	0	C // A	A // B	1	0	NaN	N	snp	100	1			0.000 (A)		0.000 (A)
363	AM_10744	rs10046	15	51502986	CYP19A1_32124C>T(3'UTR)	0.429	C // T	A // B	0.571	0.429	NaN	N	snp	100	1			0.434 (C )		0.407 (C )
364	AM_10745	rs2304461	15	51504556	CYP19A1_30554C>T(P408P)	0	C // T	A // B	1	0	NaN	N	snp	100	1			0.000 (A)		0.000 (A)
365	AM_10746	rs2304462	15	51507967	CYP19A1_27143G>A(R264H)	0	G // A	A // B	1	0	NaN	N	snp	100	1			0.000 (G)		N/D
366	AM_10747	rs700519	15	51507968	CYP19A1*4_27142C>T(R264C)	0.027	C // T	A // B	0.973	0.027	NaN	N	snp	100	1			0.031 (T)		0.116 (T)
367	AM_10748	rs700518	15	51529112	CYP19A1_5998A>G(V80V)	0.356	A // G	A // B	0.644	0.356	NaN	N	snp	99.6	1			0.420 (A)		0.465 (A)
368	AM_10749	rs2236722	15	51534995	CYP19A1*2_115T>C(W39R)	0	C // T	A // B	0	1	NaN	N	snp	100	1			0.000 (C )		0.033 (C )
369	AM_10750	rs1062033	15	51547938	CYP19A1_-12829G>C(5'UTR)	0.264	C // G	A // B	0.264	0.736	NaN	N	snp	100	1			0.491 (G)		0.453 (G)
370	AM_10751	rs57982762	15	74631994	CYP11A1_c.1091A>G(Q364R)	0	G // A	A // B	0	1	NaN	N	snp	100	1			N/D		N/D
371	AM_10752	rs72547508	15	74632028	CYP11A1_c.1057C>T(R353W)	0	T // C	A // B	0	1	NaN	N	snp	100	1			N/D		N/D
372	AM_10754	rs4986873	15	74635369	CYP11A1_c.939C>T(F313F)	0	C // T	A // B	1	0	NaN	N	snp	100	1			0.025 (T)		N/D
373	AM_10755	rs1049968	15	74635405	CYP11A1_c.903C>G(I301M)	0	G // C	A // B	0	1	NaN	N	snp	100	1			0.000 (G)		0.000 (G)
374	AM_10757	rs6160	15	74636323	CYP11A1_c.636C>T(N212N)	0	T // C	A // B	0	1	NaN	N	snp	100	1			0.000 (T)		0.000 (T)
375	AM_10758	rs58174009	15	74637475	CYP11A1_c.535G>A(V179I)	0	G // A	A // B	1	0	NaN	N	snp	100	1			0.000 (T)		0.000 (T)
376	AM_10759	rs1130841	15	74659880	CYP11A1_c.47G>A(C16Y)	0	G // A	A // B	1	0	NaN	N	snp	100	1			0.000 (A)		0.000 (A)
377	AM_10762	rs1800031	15	75012235	CYP1A1*3_3204T>C(3'UTR)	0	C // T	A // B	0	1	NaN	N	snp	100	1			0.000 (C )		N/D
378	AM_10765	rs56240201	15	75012940	CYP1A1*10_2499C>T(R477W)	0	T // C	A // B	0	1	NaN	N	snp	100	1			N/D		N/D
379	AM_10767	rs2278970	15	75012981	CYP1A1_2458C>G(A463G)	0	G // C	A // B	0	1	NaN	Y	snp	97.7	1			0.000 (C )		N/D
380	AM_10768	rs1048943	15	75012985	CYP1A1*2C_2454A>G(I462V)	0.061	G // A	A // B	0.061	0.939	NaN	Y	snp	99.1	1			0.031 (G)		0.256 (G)
381	AM_10769	rs1799814	15	75012987	CYP1A1*4_2452C>A(T461N)	0.171	C // A	A // B	0.829	0.171	NaN	Y	snp	99.9	1			0.025 (A)		0.000 (A)
382	AM_10770	rs72547509	15	75013026	CYP1A1*8_2413T>A(I448N)	0	T // A	A // B	1	0	NaN	Y	snp	99.9	1			N/D		N/D
383	AM_10771	rs72547510	15	75013093	CYP1A1*7_2345insT	0	- // T	A // B	1	0	NaN	Y	in-del	89.5	1			N/D		N/D
384	AM_10772	rs2856833	15	75013563	CYP1A1_1876C>A(F381L)	0	C // A	A // B	1	0	NaN	N	snp	100	1			0.000 (A)		0.000 (A)
385	AM_10774	rs56313657	15	75013804	CYP1A1*6_1635G>T(M331I)	0	T // G	A // B	0	1	NaN	N	snp	100	1			N/D		N/D
386	AM_10775	rs4987133	15	75014027	CYP1A1_1412T>C(I286T)	0.035	T // C	A // B	0.965	0.035	NaN	N	snp	100	1			0.004 (C )		0.012 (C )
387	AM_10776	rs34260157	15	75014049	CYP1A1_1390C>T(R279W)	0	C // T	A // B	1	0	NaN	N	snp	99.9	1			0.000 (T)		N/D
388	AM_10778	rs4646422	15	75015305	CYP1A1_134G>A(G45D)	0.001	A // G	A // B	0.001	0.999	NaN	N	snp	100	1			0.000 (A)		0.140 (A)
389	AM_10780	rs2069514	15	75038220	CYP1A2*1C_-3860G>A(Promoter)	0.085	G // A	A // B	0.915	0.085	NaN	Y	snp	98.7	1			0.081 (A)		0.242 (A)
390	AM_10782	rs35694136	15	75039613	CYP1A2*1D_-2467delT(Promoter)	0.21	- // T	A // B	0.21	0.79	NaN	N	in-del	100	1			0.241 (-)		N/D
391	AM_10783	rs2069526	15	75041341	CYP1A2*1K_-739T>G(Promoter)	0.096	G // T	A // B	0.096	0.904	NaN	N	snp	99.9	1			0.004 (G)		0.093 (G)
392	AM_10784	rs12720461	15	75041351	CYP1A2*1K_-729C>T(Promoter)	0.042	C // T	A // B	0.958	0.042	NaN	N	snp	99.9	1			0.000 (T)		0.023 (T)
393	AM_10785	rs762551	15	75041917	CYP1A2*1F_-163C>A(Promoter)	0.301	A // C	A // B	0.699	0.301	NaN	N	snp	99.9	1			0.279 (C )		0.337 (C )
394	AM_10787	rs56160784	15	75042142	CYP1A2*2_63C>G(F21L)	0	C // G	A // B	1	0	NaN	N	snp	100	1			N/D		N/D
395	AM_10788	rs72547511	15	75042204	CYP1A2*15_125C>G(P42R)	0	C // G	A // B	1	0	NaN	N	snp	100	1			N/D		N/D
396	AM_10793	rs72547513	15	75042637	CYP1A2*11_558C>A(F186L)	0	A // C	A // B	0	1	NaN	N	snp	100	1			N/D		N/D
397	AM_10796	rs56276455	15	75044195	CYP1A2*3_2116G>A(D348N)	0	A // G	A // B	0	1	NaN	N	snp	100	1			N/D		N/D
398	AM_10797	rs72547514	15	75044464	CYP1A2_2385G>A	0	A // G	A // B	0	1	NaN	N	snp	100	1			N/D		N/D
399	AM_10798	rs72547515	15	75044552	CYP1A2*16_2473G>A(R377Q)	0	G // A	A // B	1	0	NaN	N	snp	100	1			N/D		N/D
400	AM_10799	rs72547516	15	75044578	CYP1A2*4_2499A>T(I386F)	0	T // A	A // B	0	1	NaN	N	snp	99.9	1			N/D		N/D
401	AM_10801	rs55889066	15	75045575	CYP1A2*5_3497G>A(C406Y)	0	A // G	A // B	0	1	NaN	N	snp	100	1			N/D		N/D
402	AM_10802	rs56107638	15	75045612	CYP1A2*7_3533G>A(SpliceDefect)	0	A // G	A // B	0	1	NaN	N	snp	100	1			N/D		N/D
403	AM_10803	rs28399424	15	75047169	CYP1A2*6_5090C>T(R431W)	0	C // T	A // B	1	0	NaN	N	snp	100	1			0.000 (T)		N/D
404	AM_10805	rs72547517	15	75047245	CYP1A2*8_5166G>A(R456H)	0	A // G	A // B	0	1	NaN	N	snp	99.7	1			N/D		N/D
405	AM_10807	rs2470890	15	75047426	CYP1A2_5347T>C(N516N)	0.485	T // C	A // B	0.485	0.515	NaN	N	snp	99.9	1			0.339 (C )		0.128 (T)
406	AM_10808	rs8187737	15	85431000	SLC28A1_c.9C>T(N3N)	0.014	C // T	A // B	0.986	0.014	NaN	N	snp	100	1			0.000 (T)		0.000 (T)
407	AM_10809	rs17215968	15	85431029	SLC28A1_c.38C>G(S13C)	0	C // G	A // B	1	0	NaN	N	snp	100	1			N/D		N/D
408	AM_10810	rs17222302	15	85432030	SLC28A1_c.124T>C(L42L)	0	C // T	A // B	0	1	NaN	N	snp	100	1			0.032 (C )		N/D
409	AM_10812	rs17215892	15	85432038	SLC28A1_c.132C>G(P44P)	0	C // G	A // B	1	0	NaN	N	snp	100	1			N/D		N/D
410	AM_10813	rs8187751	15	85438188	SLC28A1_c.295C>T(L99L)	0	T // C	A // B	0	1	NaN	N	snp	100	1			0.000 (T)		0.000 (T)
411	AM_10814	rs2277577	15	85438281	SLC28A1_c.388C>G(R130G)	0	G // C	A // B	0	1	NaN	N	snp	100	1			0.000 (C )		0.000 (C )
412	AM_10816	rs2290272	15	85447431	SLC28A1_c.565G>A(V189I)	0.318	G // A	A // B	0.682	0.318	NaN	N	snp	100	1			0.376 (T)		0.442 (T)
413	AM_10817	rs45523532	15	85447434	SLC28A1_c.568G>T(A190S)	0.006	G // T	A // B	0.994	0.006	NaN	N	snp	100	1			0.008 (T)		N/D
414	AM_10818	rs8187755	15	85448796	SLC28A1_c.630A>T(G210G)	0.004	A // T	A // B	0.996	0.004	NaN	N	snp	100	1			0.001 (T)		0.000 (T)
415	AM_10819	rs17215934	15	85448855	SLC28A1_c.689C>T(A230V)	0	C // T	A // B	1	0	NaN	N	snp	100	1			0.000 (T)		0.000 (T)
416	AM_10820	rs8187758	15	85448875	SLC28A1_c.709C>A(Q237K)	0.164	C // A	A // B	0.836	0.164	NaN	N	snp	100	1			0.263 (A)		0.291 (A)
417	AM_10822	rs17222274	15	85467227	SLC28A1_c.969A>G(P323P)	0	A // G	A // B	1	0	NaN	N	snp	100	1			N/D		N/D
418	AM_10823	rs3803390	15	85467275	SLC28A1_c.1017C>T(H339H)	0.029	C // T	A // B	0.971	0.029	NaN	N	snp	100	1			0.058 (A)		0.477 (G)
419	AM_10824	rs17222379	15	85476390	SLC28A1_c.1098G>A(S366S)	0	A // G	A // B	0	1	NaN	N	snp	100	1			0.000 (A)		N/D
420	AM_10825	rs2305367	15	85476441	SLC28A1_c.1149A>G(K383K)	0.309	A // G	A // B	0.309	0.691	NaN	N	snp	100	1			0.375 (T)		0.202 (T)
421	AM_10826	rs8042415	15	85476489	SLC28A1_c.1197A>C(G399G)	0	A // C	A // B	1	0	NaN	N	snp	100	1			0.000 (C )		0.006 (C )
422	AM_10827	rs17222386	15	85478276	SLC28A1_c.1234G>C(E412Q)	0	C // G	A // B	0	1	NaN	N	snp	100	1			N/D		N/D
423	AM_10829	rs2242048	15	85478410	SLC28A1_c.1368G>A(Q456Q)	0.056	A // G	A // B	0.056	0.944	NaN	N	snp	100	1			0.086 (T)		0.093 (T)
424	AM_10830	rs8187779	15	85478573	SLC28A1_c.1405C>A(R469R)	0	A // C	A // B	0	1	NaN	N	snp	100	1			0.000 (A)		0.000 (A)
425	AM_10832	rs2242046	15	85478729	SLC28A1_c.1561G>A(D521N)	0.435	G // A	A // B	0.435	0.565	NaN	N	snp	100	1			0.491 (C )		0.105 (T)
426	AM_10833	rs45584739	15	85486730	SLC28A1_c.1636T>C(S546P)	0.004	C // T	A // B	0.004	0.996	NaN	N	snp	100	1			0.000 (C )		0.006 (C )
427	AM_10834	rs17222267	15	85488045	SLC28A1_c.1821C>T(T607T)	0	C // T	A // B	1	0	NaN	N	snp	100	1			0.000 (T)		0.011 (T)
428	AM_10835	rs72547519	15	85488361	SLC28A1_c.1880A>G(N627S)	0.001	A // G	A // B	0.999	0.001	NaN	N	snp	100	1			N/D		N/D
429	AM_10836	rs17222421	15	85488384	SLC28A1_c.1903C>G(L635V)	0	C // G	A // B	1	0	NaN	N	snp	99.9	1			N/D		N/D
430	AM_10837	rs72547520	15	85488439	SLC28A1_c.*8A>G	0.001	A // G	A // B	0.999	0.001	NaN	N	snp	99.7	1			N/D		N/D
431	AM_10838	rs17222428	15	85488456	SLC28A1_c.*25C>T	0	C // T	A // B	1	0	NaN	N	snp	100	1			N/D		N/D
432	AM_10839	rs8025045	15	85488572	SLC28A1_c.*141G>T	0.057	G // T	A // B	0.943	0.057	NaN	N	snp	100	1			0.106 (T)		0.093 (T)
433	AM_10851	rs72547521	15	92459646	SLCO3A1_c.604_605AT>TA(I202Y)	0	AT // TA	A // B	1	0	NaN	N	snp	99.7	1			N/D		N/D
434	AM_10890	rs1517618	15	92647645	SLCO3A1_c.882G>C(E294D)	0.076	G // C	A // B	0.076	0.924	NaN	N	snp	99.9	1			0.250 (C )		0.067 (C )
435	AM_10899	rs2190748	15	92685078	SLCO3A1_c.1513-5136A>G	0.341	A // G	A // B	0.341	0.659	NaN	N	snp	100	1			0.403 (T)		0.477 (T)
436	AM_10900	rs2283458	15	92689112	SLCO3A1_c.1513-1102G>A	0.437	A // G	A // B	0.437	0.563	NaN	N	snp	98.7	1			0.323 (T)		0.453 (T)
437	AM_10902	rs960440	15	92698643	SLCO3A1_c.1753+4399C>G	0.093	G // C	A // B	0.093	0.907	NaN	N	snp	100	1			0.219 (T)		0.465 (T)
438	AM_10903	rs3743369	15	92707569	SLCO3A1_c.*1204G>A	0.252	A // G	A // B	0.748	0.252	NaN	N	snp	99.6	1			0.345 (C )		0.151 (T)
439	AM_10911	rs35454573	16	1272820	TPSG1_c.342_343insA(-115S)	0	- // A	A // B	1	0	NaN	N	in-del	100	1			N/D		N/D
440	AM_10913	rs909921	16	1273803	TPSG1_c.74-209A>G	0.32	G // A	A // B	0.32	0.68	NaN	N	snp	99.4	1			0.425 (C )		0.105 (C )
441	AM_10915	rs8187844	16	16103682	ABCC1_c.275C>T(S92F)	0	C // T	A // B	1	0	NaN	N	snp	100	1			0.004 (T)		0.012 (T)
442	AM_10917	rs8187848	16	16130340	ABCC1_c.689G>A(R230Q)	0	G // A	A // B	1	0	NaN	N	snp	99.9	1			0.009 (A)		0.012 (A)
443	AM_10920	rs246221	16	16138322	ABCC1_c.825T>C(V275V)	0.42	C // T	A // B	0.42	0.58	NaN	N	snp	100	1			0.301 (C )		0.453 (C )
444	AM_10922	rs8187852	16	16139709	ABCC1_c.1057G>A(V353M)	0	A // G	A // B	0	1	NaN	N	snp	99.9	1			N/D		N/D
445	AM_10924	rs8187853	16	16139720	ABCC1_c.1068G>A(T356T)	0.011	G // A	A // B	0.989	0.011	NaN	N	snp	100	1			0.000 (A)		0.000 (A)
446	AM_10925	rs60782127	16	16142079	ABCC1_c.1299G>T(R433S)	0.007	G // T	A // B	0.993	0.007	NaN	N	snp	100	1			0.017 (T)		0.000 (T)
447	AM_10928	rs8187858	16	16162039	ABCC1_c.1704C>T(Y568Y)	0.017	C // T	A // B	0.983	0.017	NaN	N	snp	95.4	1			0.106 (T)		0.000 (T)
448	AM_10929	rs8187859	16	16165585	ABCC1_c.1911C>T(D637D)	0.002	C // T	A // B	0.998	0.002	NaN	N	snp	100	1			0.000 (T)		0.000 (T)
449	AM_10930	rs8187863	16	16173221	ABCC1_c.2001C>T(S667S)	0.015	C // T	A // B	0.985	0.015	NaN	N	snp	99.9	1			0.018 (T)		0.000 (T)
450	AM_10931	rs2301666	16	16173227	ABCC1_c.2007C>T(P669P)	0	C // T	A // B	1	0	NaN	N	snp	100	1			0.000 (T)		0.022 (T)
451	AM_10932	rs4148356	16	16177275	ABCC1_c.2168G>A(R723Q)	0	G // A	A // B	1	0	NaN	N	snp	100	1			0.027 (A)		0.070 (A)
452	AM_10936	rs4148377	16	16215891	ABCC1_c.3282G>A(P1094P)	0	G // A	A // B	1	0	NaN	N	snp	99.7	1			0.000 (A)		0.000 (A)
453	AM_10939	rs8057331	16	16230411	ABCC1_c.4034C>T(T1345M)	0	C // T	A // B	1	0	NaN	N	snp	100	1			0.004 (T)		0.012 (T)
454	AM_10944	rs212090	16	16236004	ABCC1_c.*866T>A	0.414	T // A	A // B	0.586	0.414	NaN	N	snp	100	1			0.400 (A)		0.144 (A)
455	AM_10945	rs4148380	16	16236431	ABCC1_c.*1293G>A	0.071	G // A	A // B	0.929	0.071	NaN	N	snp	99.9	1			0.080 (A)		0.047 (A)
456	AM_10946	rs8056298	16	16236523	ABCC1_c.*1385G>T	0.034	G // T	A // B	0.966	0.034	NaN	N	snp	99.4	1			0.004 (T)		0.000 (T)
457	AM_10947	rs212091	16	16236650	ABCC1_c.*1512T>C	0.148	C // T	A // B	0.148	0.852	NaN	N	snp	100	1			0.0168 (G)		0.256 (G)
458	AM_10959	rs2238472	16	16251599	ABCC6_c.3803G>A(R1268Q)	0.182	G // A	A // B	0.818	0.182	NaN	N	snp	100	1			0.235 (A)		0.105 (A)
459	AM_10964	rs2856585	16	16263663	ABCC6_c.2835C>T(P945P)	0.095	T // C	A // B	0.095	0.905	NaN	N	snp	99.9	1			0.049 (A)		0.267 (A)
460	AM_10966	rs6416668	16	16271357	ABCC6_c.2542G>A(V848M)	0.004	G // A	A // B	0.996	0.004	NaN	N	snp	100	1			0.000 (T)		0.000 (T)
461	AM_10968	rs7500834	16	16272670	ABCC6_c.2400G>A(G800G)	0.004	A // G	A // B	0.004	0.996	NaN	N	snp	100	1			0.000 (T)		0.000 (T)
462	AM_10976	rs4341770	16	16276737	ABCC6_c.1994T>C(V665A)	0	T // C	A // B	1	0	NaN	N	snp	100	1			0.000 (G)		0.000 (G)
463	AM_10977	rs8058694	16	16278863	ABCC6_c.1896C>A(H632Q)	0.365	C // A	A // B	0.635	0.365	NaN	N	snp	99.7	1			0.478 (G)		0.134 (T)
464	AM_10978	rs8058696	16	16278869	ABCC6_c.1890C>G(T630T)	0.362	C // G	A // B	0.638	0.362	NaN	N	snp	98.9	1			0.388 (C )		0.091 (C )
465	AM_10985	rs11401	16	28602991	CCDC101_c.846A>G(R282R)	0.203	A // G	A // B	0.797	0.203	NaN	N	snp	97.4	1			0.150 (C )		0.093 (C )
466	AM_10988	rs45472392	16	28603643	SULT1A2_c.716A>G(N239S)	0.002	A // G	A // B	0.998	0.002	NaN	N	snp	100	1			N/D		N/D
467	AM_10989	rs1059491	16	28603655	SULT1A2_c.704A>C(N235T)	0.206	A // C	A // B	0.794	0.206	NaN	N	snp	95.7	1			0.290 (C )		N/D
468	AM_10996	rs10797300	16	28607196	SULT1A2_c.56C>T(P19L)	0	C // T	A // B	1	0	NaN	N	snp	100	1			N/D		N/D
469	AM_10997	rs1136703	16	28607232	SULT1A2_c.20C>T(T7I)	0	T // C	A // B	0	1	NaN	N	snp	100	1			0.158 (C )		N/D
470	AM_11004	rs1801030	16	28617485	SULT1A1*3_c.667A>G(M223V)	0.019	A // G	A // B	0.981	0.019	NaN	Y	snp	99.9	1			0.000 (G)		0.000 (G)
471	AM_11005	rs9282861	16	28617514	SULT1A1*2_c.638G>A(R213H)	0.179	A // G	A // B	0.179	0.821	NaN	Y	snp	96.6	1			0.200 (A)		N/D
472	AM_11012	rs72547527	16	28620067	SULT1A1*4_c.110G>A(R37Q)	0	G // A	A // B	1	0	NaN	Y	snp	98.9	1			N/D		N/D
473	AM_11017	rs67878449	16	29474723	SULT1A3_C>T(R144C)_alternate	0.006	C // T	A // B	0.994	0.006	NaN	N	snp	100	1			N/D		N/D
474	AM_11018	rs35044222	16	29475588	SULT1A3_G>T(K234N)_alternate	0	G // T	A // B	1	0	NaN	N	snp	98	1			N/D		N/D
475	AM_11021	rs1364182	16	29656093	CA5P_G>T(rs1364182)	0.146	G // T	A // B	0.854	0.146	NaN	N	snp	99.7	1			0.103 (A)		0.453 (C )
476	AM_11022	rs11859842	16	29661217	CA5P_A>G(rs11859842)	0.198	A // G	A // B	0.802	0.198	NaN	N	snp	99.6	1			0.473 (T)		0.023 (C )
477	AM_11023	rs11150564	16	29666736	CA5P_C>T(rs11150564)	0.417	C // T	A // B	0.417	0.583	NaN	N	snp	100	1			0.425 (A)		0.337 (A)
478	AM_11024	rs4788172	16	29668253	SPN_G>A(rs4788172)	0.119	A // G	A // B	0.119	0.881	NaN	N	snp	99.9	1			0.075 (A)		0.314 (A)
479	AM_11025	rs3862476	16	29687360	QPRT_T>C(rs3862476)	0.07	C // T	A // B	0.07	0.93	NaN	N	snp	99.9	1			0.067 (C )		0.000 (C )
480	AM_11026	rs13331798	16	29747291	QPRT_T>G(rs13331798)	0.14	G // T	A // B	0.14	0.86	NaN	N	snp	97.6	1			N/D		N/D
481	AM_11028	rs67878449	16	30214068	SULT1A3_C>T(R144C)	0.006	C // T	A // B	0.994	0.006	NaN	N	snp	100	1			N/D		N/D
482	AM_11029	rs35044222	16	30214933	SULT1A3_G>T(K234N)	0	G // T	A // B	1	0	NaN	N	snp	97.7	1			N/D		N/D
483	AM_11032	rs11150606	16	31099011	PRSS53_c.89A>G(Q30R)	0.01	G // A	A // B	0.01	0.99	NaN	N	snp	87.4	1			0.031 (C )		0.186 (T)
484	AM_11034	rs7294	16	31102321	VKORC1_c.*134G>A(3'UTR)	0.283	A // G	A // B	0.283	0.717	NaN	N	snp	98.9	1			0.363 (A)		0.058 (A)
485	AM_11035	rs11540137	16	31102324	VKORC1_c.*131C>A(3'UTR)	0	A // C	A // B	0	1	NaN	N	snp	100	1			N/D		N/D
486	AM_11036	rs104894542	16	31102564	VKORC1_c.383T>G(L128R)	0	T // G	A // B	1	0	NaN	N	snp	100	1			N/D		N/D
487	AM_11037	rs7200749	16	31102589	VKORC1_c.358C>T(L120L)	0.043	T // C	A // B	0.043	0.957	NaN	N	snp	100	1			0.009 (A)		0.000 (A)
488	AM_11038	rs72547528	16	31102655	VKORC1_c.292C>T(R98W)	0	C // T	A // B	1	0	NaN	N	snp	100	1			N/D		N/D
489	AM_11039	rs17884982	16	31103545	VKORC1_c.284-882A>T	0	T // A	A // B	0	1	NaN	N	snp	100	1			N/D		N/D
490	AM_11040	rs2359612	16	31103796	VKORC1_c.283+837C>T	0.447	T // C	A // B	0.553	0.447	NaN	N	snp	99.4	1			0.398 (A)		0.058 (G)
491	AM_11041	rs17884850	16	31104402	VKORC1_c.283+231G>A	0	A // G	A // B	0	1	NaN	N	snp	100	1			N/D		N/D
492	AM_11042	rs17886199	16	31104447	VKORC1_c.283+186T>C	0.005	C // T	A // B	0.005	0.995	NaN	N	snp	99.7	1			0.000 (C )		0.000 (C )
493	AM_11043	rs8050894	16	31104509	VKORC1_c.283+124G>C	0.443	G // C	A // B	0.443	0.557	NaN	N	snp	100	1			0.375 (G)		0.056 (C )
494	AM_11044	rs72547529	16	31104720	VKORC1_c.196G>A(V66M)	0	A // G	A // B	0	1	NaN	N	snp	100	1			N/D		N/D
495	AM_11045	rs9934438	16	31104878	VKORC1_c.174-136C>T	0.456	T // C	A // B	0.544	0.456	NaN	N	snp	100	1			0.398 (A)		0.058 (G)
496	AM_11046	rs13336384	16	31105171	VKORC1_c.174-429C>T	0.003	T // C	A // B	0.003	0.997	NaN	N	snp	99.9	1			0.004 (A)		0.000 (A)
497	AM_11047	rs17708472	16	31105353	VKORC1_c.173+525C>T	0.133	C // T	A // B	0.867	0.133	NaN	N	snp	100	1			0.235 (A)		0.000 (A)
498	AM_11048	rs13337470	16	31105392	VKORC1_c.173+486C>A	0.001	A // C	A // B	0.001	0.999	NaN	N	snp	100	1			N/D		N/D
499	AM_11049	rs2884737	16	31105554	VKORC1_c.173+324T>G	0.487	T // G	A // B	0.513	0.487	NaN	N	snp	99.9	1			0.257 (C )		N/D
500	AM_11050	rs104894541	16	31105879	VKORC1_c.172A>G(R58G)	0	G // A	A // B	0	1	NaN	N	snp	100	1			N/D		N/D
501	AM_11051	rs104894540	16	31105917	VKORC1_c.134T>C(V45A)	0	T // C	A // B	1	0	NaN	N	snp	99.1	1			N/D		N/D
502	AM_11052	rs104894539	16	31105966	VKORC1_c.85G>T(V29L)	0	T // G	A // B	0	1	NaN	N	snp	99.7	1			N/D		N/D
503	AM_11054	rs9923231	16	31107689	VKORC1_c.-1639G>A(Promoter)	0.46	G // A	A // B	0.46	0.54	NaN	Y	snp	98.6	1			0.398 (T)		0.058 (C )
504	AM_11055	rs17878544	16	31107927	VKORC1_c.-1877A>G(Promoter)	0.056	A // G	A // B	0.944	0.056	NaN	N	snp	100	1			N/D		N/D
505	AM_11061	rs17884388	16	31111064	VKORC1_c.-5014T>C(Promoter)	0	C // T	A // B	0	1	NaN	N	snp	99.9	1			N/D		N/D
506	AM_11065	rs11568314	16	66970561	CES2_c.268+947A>T	0.011	A // T	A // B	0.989	0.011	NaN	Y	snp	99.9	1			0.051 (T)		N/D
507	AM_11066	rs4783745	16	66970975	CES2_c.269-965A>G	0.191	G // A	A // B	0.191	0.809	NaN	Y	snp	99.6	1			0.5		0.265 (G)
508	AM_11067	rs11568311	16	66971257	CES2_c.269-683G>A	0.042	A // G	A // B	0.042	0.958	NaN	N	snp	100	1			0.062 (A)		N/D
509	AM_11068	rs72547531	16	66971963	CES2_c.292C>T(R98W)	0	C // T	A // B	1	0	NaN	N	snp	100	1
510	AM_11070	rs72547532	16	66974125	CES2_c.616G>A(V206M)	0	A // G	A // B	0	1	NaN	N	snp	100	1
511	AM_11075	rs72547533	16	66976006	CES2_c.1330-2A>G(SpliceDefect)	0	G // A	A // B	0	1	NaN	N	snp	100	1
512	AM_11076	rs3893757	16	66977114	CES2_c.1613-88C>T(SpliceDefect)	0	C // T	A // B	1	0	NaN	N	snp	100	1
513	AM_11078	rs10517	16	69743760	NQO1_c.*1119C>T	0.138	C // T	A // B	0.862	0.138	NaN	N	snp	99.7	1			0.195 (T)		0.381 (T)
514	AM_11080	rs1063556	16	69744747	NQO1_c.*132T>C	0	C // T	A // B	0	1	NaN	N	snp	100	1
515	AM_11081	rs1050873	16	69744774	NQO1_c.*105A>C	0	C // A	A // B	0	1	NaN	N	snp	100	1
516	AM_11082	rs3191214	16	69744855	NQO1_c.*24C>T	0	C // T	A // B	1	0	NaN	N	snp	100	1
517	AM_11084	rs1800566	16	69745145	NQO1_c.559C>T(P187S)	0.271	T // C	A // B	0.271	0.729	NaN	N	snp	100	1			0.212 (T)		0.478 (C )
518	AM_11085	rs1131341	16	69748869	NQO1_c.415C>T(R139W)	0.04	C // T	A // B	0.96	0.04	NaN	N	snp	100	1			0.035 (T)		0.024 (T)
519	AM_11088	rs689453	16	69752373	NQO1_c.72G>A(E24E)	0.106	G // A	A // B	0.894	0.106	NaN	N	snp	100	1			0.076 (A)		0.012 (A)
520	AM_11089	rs55676788	16	71560153	CHST4_c.-81T>C	0.035	C // T	A // B	0.035	0.965	NaN	N	snp	99.3	1			0.125 (C )		N/D
521	AM_11090	rs72547534	16	71570992	CHST4_c.412T>C(C138R)	0	C // T	A // B	0	1	NaN	N	snp	99.1	1
522	AM_11091	rs3813744	16	71571663	CHST4_c.1083C>A(H361Q)	0	A // C	A // B	0	1	NaN	N	snp	99.4	1			N/D		N/D
523	AM_11116	rs72547547	16	75513531	CHST6_c.196G>C(V66L)	0	C // G	A // B	0	1	NaN	N	snp	100	1
524	AM_11119	rs68043642	16	75513662	CHST6_c.65T>G(L22R)	0	T // G	A // B	1	0	NaN	N	snp	100	1
525	AM_11120	rs72547550	16	75513675	CHST6_c.52C>T(Q18X)	0	T // C	A // B	0	1	NaN	N	snp	100	1
526	AM_11121	rs383400	16	75563266	CHST5_c.1017G>A(E339E)	0	G // A	A // B	1	0	NaN	N	snp	100	1
527	AM_11126	rs2937027	16	75563773	CHST5_c.510A>G(V170V)	0	A // G	A // B	1	0	NaN	N	snp	99.9	1
528	AM_11127	rs2937026	16	75563793	CHST5_c.490A>G(T164A)	0	A // G	A // B	1	0	NaN	N	snp	100	1
529	AM_11128	rs3784932	16	75564287	CHST5_c.-5A>G	0.155	G // A	A // B	0.155	0.845	NaN	N	snp	96.8	1			0.146 (C )		0.140 (C )
530	AM_11129	rs2550915	16	75564668	CHST5_c.-386G>C	0.067	C // G	A // B	0.067	0.933	NaN	N	snp	100	1			0009 (C )		N/D
531	AM_11130	rs2738792	16	75565284	CHST5_c.-1002T>C	0.157	C // T	A // B	0.843	0.157	NaN	N	snp	100	1			0.5		0.242 (C )
532	AM_11131	rs2641806	16	75565420	CHST5_c.-1138C>T	0.314	C // T	A // B	0.314	0.686	NaN	N	snp	99.9	1			0.272 (T)		0.012 (T)
533	AM_11134	rs1060254	16	87866136	SLC7A5_c.*440C>A	0	A // C	A // B	0	1	NaN	N	snp	100	1
534	AM_11135	rs1060253	16	87866138	SLC7A5_c.*438C>G	0.262	C // G	A // B	0.738	0.262	NaN	N	snp	100	1			0.317 (G)		0.422 (C )
535	AM_11141	rs1060250	16	87874736	SLC7A5_c.690C>G(N230K)	0.001	G // C	A // B	0.001	0.999	NaN	N	snp	100	1			N/D		N/D
536	AM_11147	rs2292954	16	89613123	SPG7_c.1507A>G(T503A)	0.106	A // G	A // B	0.894	0.106	NaN	N	snp	100	1			0.133 (C )		0.116 (C )
537	AM_11149	rs72547552	16	89616967	SPG7_c.1729G>A(G577S)	0	A // G	A // B	0	1	NaN	N	snp	100	1
538	AM_11150	rs60488729	16	89617008	SPG7_c.1770C>T(A590A)	0.009	C // T	A // B	0.991	0.009	NaN	N	snp	100	1			N/D		N/D
539	AM_11152	rs17783943	16	89619475	SPG7_c.1868T>G(F623C)	0	G // T	A // B	0	1	NaN	N	snp	100	1			N/D		N/D
540	AM_11154	rs2099104	16	89619540	SPG7_c.1933T>A(S645T)	0	A // T	A // B	0	1	NaN	N	snp	100	1			N/D		N/D
541	AM_11156	rs12960	16	89620328	SPG7_c.2063G>A(R688Q)	0.107	G // A	A // B	0.893	0.107	NaN	N	snp	99.7	1			0.129 (A)		0.111 (A)
542	AM_11158	rs458440	16	89623779	SPG7_c.*278T>A	0	A // T	A // B	0	1	NaN	N	snp	100	1			N/D		N/D
543	AM_11161	rs8058221	16	89624157	SPG7_c.*656G>C	0.003	C // G	A // B	0.003	0.997	NaN	N	snp	100	1			N/D		N/D
544	AM_11168	rs9930567	16	89628073	RPL13_c.334G>A(A112T)	0.365	A // G	A // B	0.365	0.635	NaN	N	snp	99.7	1			0.250 (A)		N/D
545	AM_11169	rs1062450	16	89629322	RPL13_c.508A>C(T170P)	0	A // C	A // B	1	0	NaN	N	snp	100	1			0.009 (C )		N/D
546	AM_11173	rs72547554	17	19552312	ALDH3A2_c.28C>T(Q10X)	0	C // T	A // B	1	0	NaN	N	snp	99.9	1
547	AM_11176	rs72547557	17	19554939	ALDH3A2_c.233G>A(W78X)	0	G // A	A // B	1	0	NaN	N	snp	100	1
548	AM_11180	rs72547561	17	19559736	ALDH3A2_c.529C>T(R177X)	0	C // T	A // B	1	0	NaN	N	snp	100	1
549	AM_11181	rs72547562	17	19559758	ALDH3A2_c.551C>T(T184M)	0	C // T	A // B	1	0	NaN	N	snp	100	1
550	AM_11185	rs72547566	17	19561059	ALDH3A2_c.682C>T(R228C)	0	C // T	A // B	1	0	NaN	N	snp	100	1
551	AM_11187	rs72547568	17	19561110	ALDH3A2_c.733G>A(D245N)	0	G // A	A // B	1	0	NaN	N	snp	100	1
552	AM_11196	rs72547577	17	19575103	ALDH3A2_c.1277T>G(L426X)	0	G // T	A // B	0	1	NaN	N	snp	100	1
553	AM_11200	rs72547578	17	19642891	ALDH3A1_c.1045_1046insG(G349X)	0	G // GG	A // B	1	0	NaN	N	in-del	100	1
554	AM_11202	rs60739355	17	19643684	ALDH3A1_c.914A>T(Y305F)	0.005	T // A	A // B	0.005	0.995	NaN	N	snp	99.9	1			N/D		N/D
555	AM_11203	rs2072330	17	19644472	ALDH3A1_c.741T>A(P247P)	0.16	T // A	A // B	0.84	0.16	NaN	N	snp	90.7	1			0.390 (A)		0.256 (A)
556	AM_11204	rs57633837	17	19645412	ALDH3A1_c.594G>A(T198T)	0.039	G // A	A // B	0.961	0.039	NaN	N	snp	96.7	1			N/D		N/D
557	AM_11205	rs887241	17	19645938	ALDH3A1_c.400G>T(A134S)	0.424	G // T	A // B	0.576	0.424	NaN	N	snp	100	1			0.345 (T)		0.023 (T)
558	AM_11209	rs11569781	17	37824754	PNMT_c.26A>G(N9S)	0	A // G	A // B	1	0	NaN	N	snp	99.1	1
559	AM_11214	rs5639	17	37826355	PNMT_c.562A>T(S188C)	0	A // T	A // B	1	0	NaN	N	snp	100	1
560	AM_11218	rs5643	17	37826619	PNMT_c.826T>A(W276R)	0	A // T	A // B	0	1	NaN	N	snp	100	1			N/D		0.011 (A)
561	AM_11219	rs2952151	17	37828496	PGAP3_c.*560G>A	0.284	G // A	A // B	0.716	0.284	NaN	N	snp	98.9	1			0.292 (T)		0.465 (T)
562	AM_11225	rs1003355	17	48745066	ABCC3_c.1583C>G(A528G)	0	C // G	A // B	1	0	NaN	N	snp	99.9	1			N/D		N/D
563	AM_11231	rs4148416	17	48753423	ABCC3_c.3039C>T(G1013G)	0.101	C // T	A // B	0.899	0.101	NaN	N	snp	100	1			0.031 (T)		0.093 (T)
564	AM_11235	rs11568591	17	48761053	ABCC3_c.3890G>A(R1297H)	0.04	A // G	A // B	0.04	0.96	NaN	N	snp	100	1			0.053 (A)		N/D
565	AM_11236	rs2277624	17	48761105	ABCC3_c.3942C>T(H1314H)	0.199	T // C	A // B	0.199	0.801	NaN	N	snp	100	1			0.204 (A)		0.221 (A)
566	AM_11239	rs1051625	17	48761439	ABCC3_c.4084C>G(L1362V)	0	C // G	A // B	1	0	NaN	N	snp	100	1			N/D		N/D
567	AM_11243	rs1051640	17	48768486	ABCC3_c.4509A>G(E1503E)	0.098	A // G	A // B	0.902	0.098	NaN	N	snp	100	1			0.190 (G)		0.047 (G)
568	AM_11245	rs59755869	18	662164	TYMS_c.298G>C(E100Q)	0	C // G	A // B	0	1	NaN	N	snp	100	1			N/D		N/D
569	AM_11246	rs11540152	18	662215	TYMS_c.349T>C(F117L)	0	C // T	A // B	0	1	NaN	N	snp	100	1			N/D		N/D
570	AM_11247	rs3786362	18	662247	TYMS_c.381A>G(E127E)	0.011	A // G	A // B	0.989	0.011	NaN	N	snp	100	1			N/D		0.198 (C )
571	AM_11248	rs596909	18	669087	TYMS_c.470G>T(G157V)	0	G // T	A // B	1	0	NaN	N	snp	100	1			N/D		N/D
572	AM_11249	rs11540153	18	669117	TYMS_c.500C>T(T167I)	0	T // C	A // B	0	1	NaN	N	snp	100	1
573	AM_11250	rs11559053	18	9517043	RALBP1_c.445A>G(K149E)	0	A // G	A // B	1	0	NaN	N	snp	100	1
574	AM_11251	rs28552921	18	9517221	RALBP1_c.623G>A(R208Q)	0.001	G // A	A // B	0.999	0.001	NaN	N	snp	100	1			N/D		N/D
575	AM_11252	rs35867116	18	9535817	RALBP1_c.1850C>T(A617V)	0	T // C	A // B	0	1	NaN	N	snp	99	1			N/D		N/D
576	AM_11253	rs10898	18	9536249	RALBP1_c.*314T>C	0.241	T // C	A // B	0.759	0.241	NaN	N	snp	98.9	1			0.310 (C )		0.5
577	AM_11254	rs3322	18	9536691	RALBP1_c.*756G>A	0.099	A // G	A // B	0.099	0.901	NaN	N	snp	100	1			0.106 (A)		N/D
578	AM_11255	rs12680	18	9537835	RALBP1_c.*1900G>C	0.049	G // C	A // B	0.951	0.049	NaN	N	snp	99.7	1			0.050 (C )		0.022 (C )
579	AM_11257	rs418546	18	24496917	CHST9_c.638A>C(K213T)	0	C // A	A // B	0	1	NaN	N	snp	100	1			0.000 (C )		0.000 (C )
580	AM_11258	rs17694469	18	24497190	CHST9_c.365G>A(S122N)	0.024	A // G	A // B	0.024	0.976	NaN	N	snp	100	1			0.039 (T)		0.012 (T)
581	AM_11259	rs417808	18	24497224	CHST9_c.331A>C(T111P)	0	C // A	A // B	0	1	NaN	N	snp	100	1
582	AM_11260	rs1155514	18	24628442	CHST9_c.147A>C(Q49H)	0	C // A	A // B	0	1	NaN	N	snp	100	1
583	AM_11262	rs28693844	18	24722839	CHST9_c.-66C>T	0.001	T // C	A // B	0.001	0.999	NaN	N	snp	100	1			N/D		0.042 (A)
584	AM_11263	rs4808326	19	15726147	CYP4F8_-281G>A	0.096	A // G	A // B	0.096	0.904	NaN	N	snp	100	1			0.119 (A)		0.070 (A)
585	AM_11264	rs4646523	19	15726487	CYP4F8_60G>T(L20L)	0.354	G // T	A // B	0.354	0.646	NaN	N	snp	100	1			0.398 (G)		0.400 (T)
586	AM_11265	rs59092606	19	15728933	CYP4F8_2506C>T(V107V)	0	C // T	A // B	1	0	NaN	N	snp	100	1			N/D		N/D
587	AM_11266	rs2072600	19	15730331	CYP4F8_3904A>T(Y125F)	0	A // T	A // B	1	0	NaN	N	snp	99.9	1			N/D		N/D
588	AM_11267	rs4646532	19	15739230	CYP4F8_12803C>T(R412X)	0	C // T	A // B	1	0	NaN	N	snp	100	1			N/D		N/D
589	AM_11268	rs2056822	19	15739597	CYP4F8_13170C>A(P447P)	0.281	A // C	A // B	0.281	0.719	NaN	N	snp	99.7	1			0.270 (A)		0.302 (A)
590	AM_11269	rs4239614	19	15740220	CYP4F8_13793T>C	0.274	T // C	A // B	0.726	0.274	NaN	N	snp	97.4	1			0.270 (C )		0.302 (C )
591	AM_11270	rs61734305	19	15752365	CYP4F3_140G>A(R47H)	0	A // G	A // B	0	1	NaN	N	snp	100	1
592	AM_11271	rs61734303	19	15756540	CYP4F3_4315G>A(S70S)	0	G // A	A // B	1	0	NaN	N	snp	100	1
593	AM_11272	rs34923393	19	15756618	CYP4F3_4393C>G(H96Q)	0	G // C	A // B	0	1	NaN	N	snp	99.9	1
594	AM_11274	rs61734315	19	15758097	CYP4F3_5872A>G(Y163C)	0	A // G	A // B	1	0	NaN	N	snp	100	1
595	AM_11275	rs1053037	19	15760053	CYP4F3_7828G>A(L203L)	0	A // G	A // B	0	1	NaN	N	snp	98.9	1			N/D		N/D
596	AM_11279	rs1805041	19	15763691	CYP4F3_11466G>A(P348P)	0.331	G // A	A // B	0.669	0.331	NaN	N	snp	96.3	1			0.250 (A)		0.178 (A)
597	AM_11280	rs4646904	19	15763721	CYP4F3_11496A>G(V358V)	0.338	A // G	A // B	0.338	0.662	NaN	N	snp	92.8	1			???		???
598	AM_11285	rs609636	19	15789098	CYP4F12_4759G>A(D76N)	0.085	A // G	A // B	0.085	0.915	NaN	N	snp	100	1			0.117 (T)		N/D
599	AM_11286	rs609290	19	15789140	CYP4F12_4801G>A(V90I)	0.085	A // G	A // B	0.085	0.915	NaN	N	snp	100	1			0.110 (T)		N/D
600	AM_11289	rs57578760	19	15794463	CYP4F12_10124G>C(V270L)	0	C // G	A // B	0	1	NaN	N	snp	100	1			0.034 (C )		N/D
601	AM_11290	rs59302543	19	15806846	CYP4F12_22507A>G(I406V)	0.002	A // G	A // B	0.998	0.002	NaN	N	snp	100	1			0.000 (A)		N/D
602	AM_11291	rs688755	19	15807305	CYP4F12_22966T>C(P460P)	0.2	C // T	A // B	0.2	0.8	NaN	N	snp	100	1			0.258 (C )		0.022 (C )
603	AM_11296	rs593421	19	15807830	CYP4F12_23491T>C(L504L)	0.201	T // C	A // B	0.799	0.201	NaN	N	snp	99.9	1			0.258 (C )		0.022 (C )
604	AM_11299	rs2108622	19	15990431	CYP4F2*3_18000G>A(V433M)	0.474	G // A	A // B	0.526	0.474	NaN	N	snp	100	1			0.232 (T)		0.250 (T)
605	AM_11300	rs2074900	19	15996820	CYP4F2_11602C>T(H343H)	0.151	T // C	A // B	0.151	0.849	NaN	N	snp	99	1			0.5		N/D
606	AM_11301	rs4605294	19	16000319	CYP4F2_8103C>T(L278F)	0	T // C	A // B	0	1	NaN	N	snp	100	1			N/D		N/D
607	AM_11302	rs3093153	19	16001215	CYP4F2_7207G>T(G185V)	0.023	T // G	A // B	0.023	0.977	NaN	N	snp	100	1			0.071 (T)		N/D
608	AM_11303	rs3093136	19	16003388	CYP4F2_5034C>G(A116A)	0.004	C // G	A // B	0.996	0.004	NaN	N	snp	100	1			N/D		N/D
609	AM_11304	rs8110714	19	16006323	CYP4F2_2099C>T(N112N)	0.016	T // C	A // B	0.016	0.984	NaN	N	snp	99.7	1			N/D		N/D
610	AM_11305	rs8100960	19	16006380	CYP4F2_2042A>C(G93G)	0.016	C // A	A // B	0.016	0.984	NaN	N	snp	99.9	1			N/D		N/D
611	AM_11307	rs3093106	19	16008257	CYP4F2_165A>G(P55P)	0.195	G // A	A // B	0.195	0.805	NaN	N	snp	100	1			0.100 (G)		0.100 (G)
612	AM_11308	rs2906890	19	16008384	CYP4F2_38C>G(P13R)	0	C // G	A // B	1	0	NaN	N	snp	99.9	1
613	AM_11309	rs2906891	19	16008386	CYP4F2_36G>C(W12C)	0	G // C	A // B	1	0	NaN	N	snp	100	1
614	AM_11310	rs3093105	19	16008388	CYP4F2*2_34T>G(W12G)	0.237	T // G	A // B	0.763	0.237	NaN	N	snp	78.6	1			0.142 (G)		0.083 (G)
615	AM_11313	rs1060463	19	16025176	CYP4F11_20043G>A(D446N)	0.446	G // A	A // B	0.446	0.554	NaN	N	snp	100	1			0.385 (G)		0.385 (G)
616	AM_11314	rs8104361	19	16034714	CYP4F11_10505C>T(R276C)	0.256	C // T	A // B	0.744	0.256	NaN	N	snp	100	1			0.258 (A)		0.022 (A)
617	AM_11317	rs3765070	19	16040292	CYP4F11_4927T>C(I106I)	0.449	C // T	A // B	0.551	0.449	NaN	N	snp	99.6	1			0.400 (T)		0.453 (C )
618	AM_11318	rs2305801	19	16045141	CYP4F11_78G>A(G26G)	0.271	G // A	A // B	0.729	0.271	NaN	N	snp	99.4	1			0.250 (A)		0.240 (A)
619	AM_11320	rs3810364	19	34175603	CHST8_c.-589C>T	0	C // T	A // B	1	0	NaN	N	snp	100	1			N/D		0.033 (A)
620	AM_11321	rs72547580	19	34176058	CHST8_c.-134T>C	0	C // T	A // B	0	1	NaN	N	snp	100	1
621	AM_11325	rs1064349	19	34264354	CHST8_c.*386G>A	0.105	G // A	A // B	0.895	0.105	NaN	N	snp	97.6	1			0.100 (A)		0.033 (A)
622	AM_11327	rs28399468	19	41349732	CYP2A6*8_6600G>T(R485L)	0.004	G // T	A // B	0.996	0.004	NaN	Y	snp	98.7	1			N/D		N/D
623	AM_11330	rs5031016	19	41349774	CYP2A6*7_6558T>C(I471T)	0	T // C	A // B	1	0	NaN	Y	snp	100	1
624	AM_11332	rs8192730	19	41350582	CYP2A6*28_5750G>C(E419D)	0	C // G	A // B	0	1	NaN	N	snp	99.7	1			N/D		N/D
625	AM_11334	rs8192729	19	41350996	CYP2A6_5336G>A	0.08	A // G	A // B	0.08	0.92	NaN	N	snp	100	1			0.049 (A)		0.023 (A)
626	AM_11336	rs72547582	19	41351200	CYP2A6_5132delA(K387X)	0	- // A	A // B	0	1	NaN	Y	in-del	100	1			N/D		N/D
627	AM_11337	rs28399454	19	41351267	CYP2A6*17_5065G>A(V365M)	0.008	G // A	A // B	0.992	0.008	NaN	Y	snp	96.4	1			0.004 (A)		N/D
628	AM_11341	rs2644905	19	41351967	CYP2A6_4365A>G(K289K)	0.005	G // A	A // B	0.005	0.995	NaN	N	snp	100	1			N/D		N/D
629	AM_11342	rs4079369	19	41352762	CYP2A6_3570C>G	0.08	G // C	A // B	0.08	0.92	NaN	Y	snp	99.6	1			N/D		N/D
630	AM_11343	rs3891219	19	41352912	CYP2A6_3420A>G(P233P)	0	A // G	A // B	1	0	NaN	Y	snp	98	1
631	AM_11344	rs111033610	19	41352941	CYP2A6*11_3391T>C(S224P)	0	C // T	A // B	0	1	NaN	Y	snp	100	1
632	AM_11346	rs28399444	19	41354190	CYP2A6*20_2141delAA(K196X)	0	- // AA	A // B	0	1	NaN	Y	in-del	100	1
633	AM_11349	rs28399442	19	41354458	CYP2A6_1874G>T	0	G // T	A // B	1	0	NaN	N	snp	92.2	1
634	AM_11351	rs1801272	19	41354533	CYP2A6*2_1799T>A(L160H)	0.025	T // A	A // B	0.975	0.025	NaN	N	snp	99.7	1			0.042 (A)		0.000 (A)
635	AM_11353	rs4986891	19	41354629	CYP2A6*6_1703G>A(R128Q)	0	G // A	A // B	1	0	NaN	N	snp	100	1
636	AM_11358	rs1137115	19	41356281	CYP2A6_51G>A(V17V)	0.373	G // A	A // B	0.627	0.373	NaN	Y	snp	97.7	1			0.29 (A)		N/D
637	AM_11359	rs8192720	19	41356310	CYP2A6_22C>T(L8L)	0.028	C // T	A // B	0.972	0.028	NaN	Y	snp	93.7	1			0.000 (T)		0.131 (T)
638	AM_11360	rs28399434	19	41356319	CYP2A6*13_13G>A(G5R)	0	A // G	A // B	0	1	NaN	Y	snp	99.7	1
639	AM_11361	rs28399433	19	41356379	CYP2A6*9_-48T>G(Promoter)	0.06	T // G	A // B	0.94	0.06	NaN	Y	snp	98.7	1			0.048 (G)		N/D
640	AM_11364	rs4803381	19	41357344	CYP2A6*1D_-1013A>G	0.477	G // A	A // B	0.477	0.523	NaN	N	snp	94.7	1			N/D		N/D
641	AM_11365	rs1060096	19	41381501	CYP2A7_c.*97A>G	0	A // G	A // B	1	0	NaN	N	snp	100	1			0.005 (G)		N/D
642	AM_11366	rs1060095	19	41381503	CYP2A7_c.*95G>C	0	C // G	A // B	0	1	NaN	N	snp	100	1			N/D		N/D
643	AM_11367	rs1060094	19	41381510	CYP2A7_c.*88A>C	0	A // C	A // B	1	0	NaN	N	snp	100	1			N/D		N/D
644	AM_11368	rs1060092	19	41381517	CYP2A7_c.*81T>C	0	T // C	A // B	1	0	NaN	N	snp	100	1			0.013 (C )		N/D
645	AM_11369	rs1060091	19	41381538	CYP2A7_c.*60G>C	0	C // G	A // B	0	1	NaN	N	snp	100	1
646	AM_11370	rs1060090	19	41381540	CYP2A7_c.*58G>A	0	A // G	A // B	0	1	NaN	N	snp	100	1
647	AM_11372	rs72547584	19	41381656	CYP2A7_c.1427A>G(K476R)	0	A // G	A // B	1	0	NaN	N	snp	99.3	1
648	AM_11376	rs3869579	19	41383799	CYP2A7_c.931C>T(R311C)	0.396	T // C	A // B	0.396	0.604	NaN	N	snp	94.4	1			0.397 (G)		0.5
649	AM_11377	rs2545753	19	41383827	CYP2A7_c.903A>G(A301A)	0	G // A	A // B	0	1	NaN	N	snp	100	1			N/D		N/D
650	AM_11378	rs2545754	19	41383828	CYP2A7_c.902C>G(A301G)	0	C // G	A // B	1	0	NaN	N	snp	100	1			0.008 (C )		0.000 (C )
651	AM_11379	rs4079366	19	41384675	CYP2A7_c.821A>G(H274R)	0	A // G	A // B	0	1	NaN	N	snp	99.9	1			N/D		N/D
652	AM_11388	rs3745219	19	41442352	CYP2B7P1_C>T(rs3745219)	0	C // T	A // B	1	0	NaN	N	snp	100	1			N/D		N/D
653	AM_11398	rs34223104	19	41497129	CYP2B6*22_-82T>C	0.025	C // T	A // B	0.025	0.975	NaN	Y	snp	99.4	1			N/D		N/D
654	AM_11399	rs8192709	19	41497274	CYP2B6*2_64C>T(R22C)	0.089	C // T	A // B	0.911	0.089	NaN	Y	snp	98	1			0.036 (T)		0.025 (T)
655	AM_11401	rs35303484	19	41497346	CYP2B6*11_136A>G(M46V)	0.017	A // G	A // B	0.983	0.017	NaN	Y	snp	96.7	1			N/D		N/D
656	AM_11402	rs2279341	19	41509950	CYP2B6_12740G>C(P72P)	0.101	C // G	A // B	0.101	0.899	NaN	Y	snp	99.9	1			N/D		N/D
657	AM_11403	rs36060847	19	41510030	CYP2B6*12_12820G>A(G99E)	0	A // G	A // B	0	1	NaN	Y	snp	100	1			0.004 (A)		N/D
658	AM_11405	rs12721655	19	41510282	CYP2B6*8_13072A>G(K139E)	0	A // G	A // B	1	0	NaN	N	snp	100	1			N/D		N/D
659	AM_11406	rs35773040	19	41510286	CYP2B6*14_13076G>A(R140Q)	0	G // A	A // B	1	0	NaN	N	snp	100	1			N/D		N/D
660	AM_11407	rs4803418	19	41511803	CYP2B6_14593C>G	0.413	C // G	A // B	0.587	0.413	NaN	N	snp	93.8	1			N/D		N/D
661	AM_11408	rs4803419	19	41512792	CYP2B6_15582C>T	0.418	T // C	A // B	0.418	0.582	NaN	Y	snp	92.7	1			N/D		N/D
662	AM_11409	rs3826711	19	41512824	CYP2B6*26_15614C>G(P167A)	0	C // G	A // B	1	0	NaN	Y	snp	99.9	1			N/D		N/D
663	AM_11410	rs36056539	19	41512828	CYP2B6*20_15618C>T(T168I)	0	T // C	A // B	0	1	NaN	Y	snp	99.6	1			N/D		N/D
664	AM_11411	rs3745274	19	41512841	CYP2B6*6_15631G>T(Q172H)	0.234	T // G	A // B	0.234	0.766	NaN	Y	snp	87.6	1			0.270 (T)		0.151 (T)
665	AM_11413	rs36079186	19	41512918	CYP2B6*27_15708T>C(M198T)	0	C // T	A // B	0	1	NaN	Y	snp	60.2	1			N/D		N/D
666	AM_11414	rs45482602	19	41515255	CYP2B6*3_18045C>A(S259R)	0.023	A // C	A // B	0.023	0.977	NaN	Y	snp	99.3	1			N/D		N/D
667	AM_11415	rs2279343	19	41515263	CYP2B6*4_18053A>G(K262R)	0.281	A // G	A // B	0.719	0.281	NaN	Y	snp	97.8	1			N/D		N/D
668	AM_11416	rs2279344	19	41515483	CYP2B6_18273G>A	0.153	A // G	A // B	0.847	0.153	NaN	Y	snp	98.4	1			0.394 (G)		0.302 (G)
669	AM_11417	rs28399499	19	41518221	CYP2B6*16_21011T>C(I328T)	0.007	T // C	A // B	0.993	0.007	NaN	Y	snp	99.1	1			N/D		N/D
670	AM_11418	rs34826503	19	41518244	CYP2B6*19_21034C>T(R336C)	0	C // T	A // B	1	0	NaN	Y	snp	100	1
671	AM_11419	rs34097093	19	41518370	CYP2B6*28_21160C>T(R378X)	0	C // T	A // B	1	0	NaN	Y	snp	96.1	1
672	AM_11420	rs35979566	19	41518598	CYP2B6*15_21388T>A(I391N)	0.001	A // T	A // B	0.001	0.999	NaN	N	snp	100	1			0.000 (A)		0.000 (A)
673	AM_11422	rs35010098	19	41518708	CYP2B6*21_21498C>A(P428T)	0	A // C	A // B	0	1	NaN	N	snp	100	1			N/D		N/D
674	AM_11423	rs8192719	19	41518773	CYP2B6_21563C>T	0.252	C // T	A // B	0.748	0.252	NaN	N	snp	93.7	1			0.263 (T)		0.156 (T)
675	AM_11426	rs3211371	19	41522715	CYP2B6*5_25505C>T(R487C)	0.027	C // T	A // B	0.973	0.027	NaN	N	snp	95.7	1			0.050 (T)		0.011 (T)
676	AM_11440	rs1645691	19	41596742	CYP2A13_2366C>T	0.023	C // T	A // B	0.977	0.023	NaN	N	snp	100	1			N/D		N/D
677	AM_11443	rs3885816	19	41599665	CYP2A13_5289C>T(P321L)	0	C // T	A // B	1	0	NaN	N	snp	100	1
678	AM_11446	rs1645694	19	41600808	CYP2A13_6432C>T	0.073	T // C	A // B	0.073	0.927	NaN	N	snp	100	1			0.000 (T)		0.083 (T)
679	AM_11449	rs1709082	19	41601609	CYP2A13_7233T>G	0.106	G // T	A // B	0.106	0.894	NaN	N	snp	100	1			0.075 (G)		0.100 (G)
680	AM_11456	rs305968	19	41622189	CYP2F1_96G>A(P32P)	0.35	G // A	A // B	0.65	0.35	NaN	N	snp	100	1			0.323 (A)		0.267 (A)
681	AM_11457	rs58285195	19	41622205	CYP2F1*4_112T>C(S38P)	0.107	C // T	A // B	0.107	0.893	NaN	N	snp	93	1			N/D		N/D
682	AM_11458	rs57670668	19	41622481	CYP2F1*6_388G>C(R98P)	0.001	C // G	A // B	0.001	0.999	NaN	N	snp	100	1			0.017 (C )		N/D
683	AM_11459	rs2287941	19	41627401	CYP2F1_5308G>C(V175L)	0.009	G // C	A // B	0.991	0.009	NaN	N	snp	92.8	1			N/D		N/D
684	AM_11462	rs7246981	19	41633980	CYP2F1*3_11887C>T(P490L)	0.03	C // T	A // B	0.97	0.03	NaN	N	snp	99	1			0.000 (T)		0.000 (T)
685	AM_11463	rs60694775	19	41700469	CYP2S1_1300G>A(P66P)	0	G // A	A // B	1	0	NaN	N	snp	100	1
686	AM_11464	rs338599	19	41700493	CYP2S1_1324C>G(P74P)	0.082	C // G	A // B	0.918	0.082	NaN	N	snp	97.4	1			0.05 (C )		0.122 (C )
687	AM_11465	rs16975056	19	41703763	CYP2S1_4594G>A(G141G)	0.006	A // G	A // B	0.006	0.994	NaN	N	snp	100	1			N/D		N/D
688	AM_11466	rs57266494	19	41703793	CYP2S1_4624G>A(A151A)	0.05	G // A	A // B	0.95	0.05	NaN	N	snp	97.1	1			0.033 (A)		N/D
689	AM_11474	rs296365	19	48374551	SULT2A1_c.*161C>G	0.246	G // C	A // B	0.246	0.754	NaN	N	snp	98	1			0.267 (G)		0.289 (G)
690	AM_11475	rs11569679	19	48374789	SULT2A1_c.781G>A(A261T)	0.01	A // G	A // B	0.01	0.99	NaN	N	snp	100	1			N/D		N/D
691	AM_11476	rs11569680	19	48377980	SULT2A1_c.679A>G(K227E)	0	G // A	A // B	0	1	NaN	N	snp	100	1			N/D		N/D
692	AM_11478	rs11083907	19	48389425	SULT2A1_c.90C>T(F30F)	0.006	C // T	A // B	0.994	0.006	NaN	N	snp	100	1			N/D		0.011 (T)
693	AM_11479	rs17851828	19	48389426	SULT2A1_c.89T>C(F30S)	0	T // C	A // B	1	0	NaN	N	snp	100	1
694	AM_11480	rs11569685	19	48389509	SULT2A1_c.6G>A(S2S)	0	G // A	A // B	1	0	NaN	N	snp	100	1
695	AM_11482	rs2544794	19	49079246	SULT2B1_c.120C>T(P40P)	0.114	C // T	A // B	0.886	0.114	NaN	N	snp	100	1			0.128 (A)		0.012 (A)
696	AM_11483	rs16982149	19	49079278	SULT2B1_c.152T>C(L51S)	0	C // T	A // B	0	1	NaN	N	snp	100	1			0.004 (C )		N/D
697	AM_11484	rs1052124	19	49090601	SULT2B1_c.330C>T(A110A)	0	C // T	A // B	1	0	NaN	N	snp	100	1
698	AM_11486	rs16982159	19	49096028	SULT2B1_c.600G>A(K200K)	0	A // G	A // B	0	1	NaN	N	snp	100	1
699	AM_11487	rs2302948	19	49096065	SULT2B1_c.637C>T(L213L)	0.155	T // C	A // B	0.155	0.845	NaN	N	snp	100	1			0.230 (A)		0.140 (A)
700	AM_11489	rs2302947	19	49100068	SULT2B1_c.718G>A(V240I)	0	A // G	A // B	0	1	NaN	N	snp	100	1			0.009 (T)		0.024 (T)
701	AM_11490	rs1132054	19	49102399	SULT2B1_c.834C>T(C278C)	0.377	C // T	A // B	0.377	0.623	NaN	N	snp	100	1			0.438 (C )		0.256 (T)
702	AM_11498	rs602946	1	20915535	CDA_c.-88G>A	0.014	A // G	A // B	0.014	0.986	NaN	N	snp	100	1			N/D		N/D
703	AM_11499	rs2072671	1	20915701	CDA*2_c.79A>C(K27Q)	0.418	C // A	A // B	0.418	0.582	NaN	N	snp	99.4	1			0.332 (C )		0.105 (C )
704	AM_11500	rs818202	1	20916791	CDA_c.154+1015A>G	0.361	G // A	A // B	0.639	0.361	NaN	N	snp	100	1			0.412 (T)		0.291 (C )
705	AM_11501	rs10916824	1	20918912	CDA_c.154+3136T>C	0.067	C // T	A // B	0.067	0.933	NaN	N	snp	100	1			0.058 (C )		0.070 (C )
706	AM_11506	rs60369023	1	20931474	CDA*3_c.208G>A(A70T)	0	A // G	A // B	0	1	NaN	Y	snp	99.6	1			N/D		N/D
707	AM_11520	rs1048977	1	20945055	CDA_c.435C>T(T145T)	0.164	C // T	A // B	0.836	0.164	NaN	N	snp	99.9	1			N/D		N/D
708	AM_11525	rs324420	1	46870761	FAAH_c.385C>A(P129T)	0.175	A // C	A // B	0.175	0.825	NaN	Y	snp	98.4	1			0.208 (A)		0.128 (A)
709	AM_11526	rs12094805	1	46874804	FAAH_c.1109A>G(H370R)	0	A // G	A // B	1	0	NaN	N	snp	100	1			N/D		N/D
710	AM_11539	rs7513658	1	47276819	CYP4B1_c.330G>A(K110K)	0.005	A // G	A // B	0.005	0.995	NaN	N	snp	100	1			N/D		N/D
711	AM_11543	rs4646487	1	47279175	CYP4B1_c.517C>T(R173W)	0.145	C // T	A // B	0.855	0.145	NaN	N	snp	70.7	1			0.150 (T)		0.174 (T)
712	AM_11546	rs3215983	1	47280747	CYP4B1_c.881_882delAT(D294X)	0.091	- // AT	A // B	0.091	0.909	NaN	N	in-del	99.7	1			N/D		N/D
713	AM_11547	rs45467195	1	47280830	CYP4B1*4_c.964A>G(S322G)	0.004	G // A	A // B	0.004	0.996	NaN	N	snp	99.3	1			N/D		N/D
714	AM_11549	rs2297810	1	47280859	CYP4B1_c.993G>A(M331I)	0.179	G // A	A // B	0.821	0.179	NaN	N	snp	100	1			0.144 (T)		0.300 (T)
715	AM_11550	rs4646491	1	47280884	CYP4B1_c.1018C>T(R340C)	0.094	C // T	A // B	0.906	0.094	NaN	N	snp	100	1			0.144 (C )		0.289 (C )
716	AM_11554	rs2297809	1	47282772	CYP4B1_c.1123C>T(R375C)	0.1	C // T	A // B	0.9	0.1	NaN	N	snp	100	1			0.142 (A)		0.289 (A)
717	AM_11564	rs11211402	1	47392054	CYP4A11_c.*3733A>G	0.247	G // A	A // B	0.247	0.753	NaN	N	snp	100	1			0.137 (C )		0.302 (C )
718	AM_11576	rs9333037	1	47395726	CYP4A11_c.*61A>T	0.025	T // A	A // B	0.025	0.975	NaN	N	snp	99.4	1			N/D		N/D
719	AM_11595	rs72547594	1	47403031	CYP4A11_c.338-13T>C	0	C // T	A // B	0	1	NaN	N	snp	100	1			N/D		N/D
720	AM_11597	rs9332979	1	47407217	CYP4A11_c.-112C>T	0.002	C // T	A // B	0.998	0.002	NaN	N	snp	100	1			N/D		N/D
721	AM_11608	rs2653927	1	47560735	CYP4Z1_c.876+394T>G	0	G // T	A // B	0	1	NaN	N	snp	100	1			0.008 (G)		0.067 (G)
722	AM_11609	rs4926802	1	47571902	CYP4Z1_c.1170T>C(I390I)	0.41	C // T	A // B	0.59	0.41	NaN	N	snp	65.4	1			N/D		N/D
723	AM_11611	rs7512729	1	47578471	CYP4Z1_c.1202-2730A>C	0.363	C // A	A // B	0.363	0.637	NaN	N	snp	93.2	1			0.254 (A)		N/D
724	AM_11613	rs7554948	1	47584789	CYP4Z1_c.*1183T>G	0.028	G // T	A // B	0.028	0.972	NaN	N	snp	100	1			0.004 (G)		N/D
725	AM_11621	rs2228114	1	60359335	CYP2J2_33084T>A(V499V)	0	A // T	A // B	0	1	NaN	N	snp	100	1			N/D		N/D
726	AM_11622	rs72547598	1	60366757	CYP2J2*6_25662A>T(N404Y)	0	T // A	A // B	0	1	NaN	N	snp	100	1
727	AM_11624	rs1056596	1	60370601	CYP2J2_21818T>A(L378Q)	0	A // T	A // B	0	1	NaN	N	snp	100	1			0.000 (A)		0.000 (A)
728	AM_11625	rs56053398	1	60370710	CYP2J2*5_21709G>A(D342N)	0	G // A	A // B	1	0	NaN	N	snp	99.3	1			N/D		N/D
729	AM_11627	rs66515830	1	60377389	CYP2J2*4_15029T>A(I192N)	0	A // T	A // B	0	1	NaN	N	snp	100	1			N/D		N/D
730	AM_11629	rs56307989	1	60377885	CYP2J2*3_14533C>T(R158C)	0	C // T	A // B	1	0	NaN	N	snp	100	1			N/D		N/D
731	AM_11630	rs55753213	1	60377930	CYP2J2*2_14488A>G(T143A)	0	A // G	A // B	1	0	NaN	N	snp	100	1			N/D		N/D
732	AM_11632	rs1056595	1	60381650	CYP2J2_10769C>G(R111R)	0	C // G	A // B	1	0	NaN	N	snp	99.9	1			N/D		N/D
733	AM_11637	rs890293	1	60392494	CYP2J2*7_-76G>T(Promoter)	0.055	G // T	A // B	0.945	0.055	NaN	Y	snp	99.4	1			N/D		N/D
734	AM_11639	rs1801268	1	97544627	DPYD*10_c.2983G>T(V995F)	0	G // T	A // B	1	0	NaN	N	snp	100	1
735	AM_11643	rs1801267	1	97564154	DPYD*9B_c.2657G>A(R886H)	0	A // G	A // B	0	1	NaN	Y	snp	99.9	1
736	AM_11647	rs3918290	1	97915614	DPYD*2_c.1905+1G>A	0	A // G	A // B	0	1	NaN	N	snp	91.8	1			0.004 (A)		0.000 (A)
737	AM_11648	rs3918289	1	97915615	DPYD_c.1905C>T(N635N)	0	C // T	A // B	1	0	NaN	N	snp	100	1			N/D		N/D
738	AM_11649	rs72549303	1	97915622	DPYD*3_c.1897delC(P633X)	0	- // C	A // B	0	1	NaN	N	in-del	100	1			N/D		N/D
739	AM_11650	rs17376848	1	97915624	DPYD_c.1896T>C(F632F)	0.019	T // C	A // B	0.981	0.019	NaN	N	snp	99.7	1			0.058 (G)		0.140 (G)
740	AM_11651	rs55886062	1	97981343	DPYD*13_c.1679T>G(I560S)	0	T // G	A // B	1	0	NaN	N	snp	100	1			N/D		N/D
741	AM_11653	rs1801158	1	97981421	DPYD*4_c.1601G>A(S534N)	0.047	G // A	A // B	0.953	0.047	NaN	N	snp	100	1			0.058 (A)		N/D
742	AM_11658	rs1042479	1	98058828	DPYD_c.1074T>A(R358R)	0	A // T	A // B	0	1	NaN	N	snp	99.9	1			N/D		N/D
743	AM_11659	rs1042478	1	98058867	DPYD_c.1035T>C(F345F)	0	C // T	A // B	0	1	NaN	N	snp	100	1			N/D		N/D
744	AM_11660	rs72549306	1	98058899	DPYD*11_c.1003G>T(V335L)	0	T // G	A // B	0	1	NaN	N	snp	100	1			N/D		N/D
745	AM_11662	rs6675198	1	98157279	DPYD_c.756T>C(G252G)	0	T // C	A // B	1	0	NaN	N	snp	100	1			N/D		N/D
746	AM_11663	rs1801266	1	98157332	DPYD*8_c.703C>T(R235W)	0	C // T	A // B	1	0	NaN	N	snp	100	1			N/D		N/D
747	AM_11666	rs6670886	1	98165062	DPYD_c.525G>A(S175S)	0	G // A	A // B	1	0	NaN	N	snp	100	1			N/D		N/D
748	AM_11667	rs2297595	1	98165091	DPYD_c.496A>G(M166V)	0.144	A // G	A // B	0.856	0.144	NaN	N	snp	100	1			0.071 (C )		0.012 (C )
749	AM_11668	rs72549309	1	98205971	DPYD*7_c.295delTCAT	0	- // TCAT	A // B	0	1	NaN	N	in-del	100	1			N/D		N/D
750	AM_11669	rs1801265	1	98348885	DPYD*9_c.85T>C(C29R)	0.197	C // T	A // B	0.197	0.803	NaN	N	snp	100	1			0.155 (C )		0.047 (C )
751	AM_11670	rs72549310	1	98348909	DPYD_c.61C>T(R21X)	0	C // T	A // B	1	0	NaN	N	snp	100	1
752	AM_11677	rs3211193	1	110201473	GSTM4_c.398C>A(T133K)	0	A // C	A // B	0	1	NaN	N	snp	100	1
753	AM_11686	N/A	1	110201521	GSTM4_c.446T>C(V149A)	0	T // C	A // B	1	0	NaN	N	snp	100	1
754	AM_11688	rs506008	1	110201699	GSTM4_c.534C>T(F178F)	0.137	T // C	A // B	0.137	0.863	NaN	N	snp	94.4	1			0.158 (A)		0.056 (A)
755	AM_11692	rs530021	1	110210780	GSTM2_c.36+7G>C	0.112	C // G	A // B	0.112	0.888	NaN	N	snp	100	1			N/D		N/D
756	AM_11695	rs592792	1	110211956	GSTM2_c.222C>T(N74N)	0.058	T // C	A // B	0.058	0.942	NaN	N	snp	100	1			N/D		N/D
757	AM_11697	rs1056799	1	110213949	GSTM2_c.401T>A(M134K)	0	A // T	A // B	0	1	NaN	N	snp	100	1
758	AM_11698	rs1056800	1	110213953	GSTM2_c.405G>A(L135L)	0	G // A	A // B	1	0	NaN	N	snp	100	1
759	AM_11699	rs11540636	1	110213991	GSTM2_c.443T>C(F148S)	0	C // T	A // B	0	1	NaN	N	snp	100	1
760	AM_11702	rs1065410	1	110230839	GSTM1_c.84T>C(Y28Y)	0	C // T	A // B	1	0	NaN	N	snp	99.4	1
761	AM_11705	rs737497	1	110231592	GSTM1_c.178-78T>C	0.256	T // C	A // B	0.744	0.256	NaN	N	snp	99.4	1			N/D		N/D
762	AM_11707	rs74837985	1	110233138	GSTM1*B_c.519G>C(K173N)	0.251	C // G	A // B	0.251	0.749	NaN	Y	snp	99.9	1			N/D		N/D
763	AM_11710	rs1296954	1	110254411	GSTM5_c.-524C>T	0.407	T // C	A // B	0.407	0.593	NaN	N	snp	99.3	1			N/D		N/D
764	AM_11719	rs2479390	1	110256075	GSTM5_c.178-31A>G	0.221	A // G	A // B	0.779	0.221	NaN	N	snp	95.5	1			N/D		N/D
765	AM_11720	rs2229059	1	110257590	GSTM5_c.382T>C(L128L)	0.031	C // T	A // B	0.031	0.969	NaN	N	snp	96.6	1			N/D		N/D
766	AM_11723	rs1049741	1	110260510	GSTM5_c.*462G>C	0	G // C	A // B	1	0	NaN	N	snp	100	1			N/D		N/D
767	AM_11724	rs11807	1	110260742	GSTM5_c.*694T>C	0.119	T // C	A // B	0.881	0.119	NaN	N	snp	100	1			0.254 (G)		0.122 (G)
768	AM_11729	rs1803688	1	110279663	GSTM3_c.*30G>T	0	G // T	A // B	1	0	NaN	N	snp	100	1
769	AM_11730	rs7483	1	110279701	GSTM3_c.670G>A(V224I)	0.274	A // G	A // B	0.274	0.726	NaN	N	snp	100	1			0.310 (A)		0.233 (G)
770	AM_11734	rs1799735	1	110280254	GSTM3_c.468+24_26delAGG	0.283	- // AGG	A // B	0.283	0.717	NaN	N	in-del	100	1			???		???
771	AM_11735	rs1803687	1	110280362	GSTM3_c.384G>C(K128N)	0	G // C	A // B	1	0	NaN	N	snp	100	1			N/D		N/D
772	AM_11736	rs67174253	1	110282891	GSTM3_c.19A>C(M7L)	0.001	C // A	A // B	0.001	0.999	NaN	N	snp	100	1			N/D		N/D
773	AM_11738	rs4646412	1	110283069	GSTM3_c.-160G>T	0	G // T	A // B	1	0	NaN	N	snp	100	1			N/D		0.012 (T)
774	AM_11739	rs12727968	1	113452284	SLC16A1_C>A(rs12727968)	0.112	C // A	A // B	0.888	0.112	NaN	N	snp	100	1			0.093 (T)		0.035 (T)
775	AM_11740	rs9429505	1	113454571	SLC16A1_c.*1942T>C	0.183	T // C	A // B	0.817	0.183	NaN	N	snp	99.9	1			0.274 (G)		0.000 (G)
776	AM_11741	rs11811205	1	113454637	SLC16A1_c.*1876G>C	0.011	G // C	A // B	0.989	0.011	NaN	N	snp	100	1			0.000 (G)		0.000 (G)
777	AM_11742	rs7169	1	113455099	SLC16A1_c.*1414T>C	0.324	C // T	A // B	0.324	0.676	NaN	N	snp	99.9	1			0.398 (C )		0.337 (C )
778	AM_11743	rs11585690	1	113456368	SLC16A1_c.*145T>G	0.001	T // G	A // B	0.999	0.001	NaN	N	snp	100	1			0.035 (C )		N/D
779	AM_11744	rs1049434	1	113456546	SLC16A1_c.1470A>T(E490D)	0.323	A // T	A // B	0.677	0.323	NaN	N	snp	100	1			0.364 (T)		0.367 (T)
780	AM_11745	rs12090418	1	113458216	SLC16A1_c.1229-1429C>T	0.004	C // T	A // B	0.996	0.004	NaN	N	snp	100	1			N/D		N/D
781	AM_11756	rs72549314	1	146658711	FMO5_c.1370C>T(P457L)	0	T // C	A // B	0	1	NaN	N	snp	100	1
782	AM_11758	rs1044848	1	146672866	FMO5_c.1051T>C(S351P)	0	T // C	A // B	1	0	NaN	N	snp	100	1
783	AM_11759	rs894469	1	146672906	FMO5_c.1011A>G(P337P)	0.046	A // G	A // B	0.954	0.046	NaN	N	snp	99.7	1			0.111 (G)		0.012 (G)
784	AM_11765	N/A	1	146676364	FMO5_20258T>A	0	A // T	A // B	0	1	NaN	N	snp	100	1
785	AM_11766	N/A	1	146676384	FMO5_20238C>T	0	C // T	A // B	1	0	NaN	N	snp	100	1
786	AM_11773	rs72549315	1	146680471	FMO5_c.773delA(E258X)	0	- // A	A // B	0	1	NaN	N	in-del	100	1
787	AM_11774	rs72549316	1	146683983	FMO5_c.607_608insT(E203X)	0	- // T	A // B	1	0	NaN	N	in-del	99.9	1
788	AM_11793	rs2229175	1	150795775	ARNT_c.1289G>A(R430Q)	0	G // A	A // B	1	0	NaN	N	snp	100	1			0.014 (A)		0.062 (A)
789	AM_11794	rs72549317	1	150795840	ARNT_c.1243-19G>T	0	T // G	A // B	0	1	NaN	N	snp	100	1			N/D		N/D
790	AM_11804	rs2228099	1	150808889	ARNT_c.567G>C(V189V)	0.496	C // G	A // B	0.504	0.496	NaN	N	snp	100	1			0.375 (C )		0.392 (C )
791	AM_11805	rs17855058	1	150812049	ARNT_c.354C>A(T118T)	0	A // C	A // B	0	1	NaN	N	snp	100	1
792	AM_11806	rs17855059	1	150814902	ARNT_c.270C>A(A90A)	0	C // A	A // B	1	0	NaN	N	snp	100	1
793	AM_11807	rs10305678	1	150814923	ARNT_c.249T>C(S83S)	0	C // T	A // B	0	1	NaN	N	snp	100	1
794	AM_11808	rs10305649	1	150849103	ARNT_c.-60G>T	0.001	G // T	A // B	0.999	0.001	NaN	N	snp	100	1			0.034 (T)		0.000 (T)
795	AM_11809	rs5085	1	161192511	APOA2_c.185+197G>C	0.199	C // G	A // B	0.199	0.801	NaN	N	snp	99.7	1			0.173 (C )		0.244 (C )
796	AM_11832	rs72549318	1	161212063	NR1I3_G>A(rs72549318)	0	G // A	A // B	1	0	NaN	N	snp	100	1			N/D		N/D
797	AM_11833	rs11584174	1	161212453	NR1I3_G>A(rs11584174)	0.124	A // G	A // B	0.124	0.876	NaN	N	snp	99.9	1			0.150 (T)		0.233 (T)
798	AM_11834	rs2501870	1	161212569	NR1I3_C>T(rs2501870)	0.291	C // T	A // B	0.709	0.291	NaN	N	snp	100	1			0.259 (T)		0.279 (T)
799	AM_11835	rs55802895	1	161212743	NR1I3_G>A(rs55802895)	0.106	G // A	A // B	0.894	0.106	NaN	N	snp	100	1			0.142 (T)		0.233 (T)
800	AM_11836	rs72549319	1	161212956	NR1I3_T>A(rs72549319)	0	T // A	A // B	1	0	NaN	N	snp	100	1			N/D		N/D
801	AM_11837	rs11265572	1	161213063	NR1I3_C>A(rs11265572)	0.005	C // A	A // B	0.995	0.005	NaN	N	snp	99.9	1			N/D		0.047 (T)
802	AM_11857	rs72549320	1	171061893	FMO3_c.94G>A(E32K)	0	G // A	A // B	1	0	NaN	N	snp	100	1
803	AM_11866	rs72549321	1	171072947	FMO3_c.154G>A(A52T)	0	A // G	A // B	0	1	NaN	N	snp	100	1
804	AM_11867	rs72549322	1	171072975	FMO3_c.182A>G(N61S)	0	A // G	A // B	1	0	NaN	N	snp	100	1
805	AM_11868	rs72549323	1	171072991	FMO3_c.198G>T(M66I)	0	G // T	A // B	1	0	NaN	N	snp	100	1
806	AM_11869	rs72549324	1	171073038	FMO3_c.245T>C(M82T)	0	C // T	A // B	0	1	NaN	N	snp	95.5	1
807	AM_11871	rs12072582	1	171076888	FMO3_c.394G>C(D132H)	0.003	C // G	A // B	0.003	0.997	NaN	N	snp	100	1			0.000 (C )		0.000 (C )
808	AM_11872	rs1800822	1	171076935	FMO3_c.441C>T(S147S)	0.102	C // T	A // B	0.898	0.102	NaN	N	snp	100	1			0.066 (T)		0.140 (T)
809	AM_11873	rs72549325	1	171076936	FMO3_c.442G>T(G148X)	0	T // G	A // B	0	1	NaN	N	snp	100	1
810	AM_11874	rs72549326	1	171076952	FMO3_c.458C>T(P153L)	0	C // T	A // B	1	0	NaN	N	snp	100	1
811	AM_11875	rs2266782	1	171076966	FMO3_c.472G>A(E158K)	0.27	A // G	A // B	0.27	0.73	NaN	N	snp	98.9	1			0.383 (A)		0.189 (A)
812	AM_11877	rs72549327	1	171077331	FMO3_c.596T>A(I199N)	0	A // T	A // B	0	1	NaN	N	snp	88.4	1
813	AM_11878	rs72549328	1	171077339	FMO3_c.604_605insT(E202X)	0	- // T	A // B	1	0	NaN	N	in-del	100	1
814	AM_11880	rs2066534	1	171077372	FMO3_c.627+10C>G	0.2	C // G	A // B	0.8	0.2	NaN	N	snp	99.4	1			0.217 (G)		0.033 (G)
815	AM_11884	rs1050902	1	171080028	FMO3_c.717T>C(F239F)	0	C // T	A // B	0	1	NaN	N	snp	100	1
816	AM_11885	rs1736557	1	171080080	FMO3_c.769G>A(V257M)	0.156	A // G	A // B	0.156	0.844	NaN	N	snp	100	1			0.059 (A)		0.267 (A)
817	AM_11887	rs2066530	1	171083149	FMO3_c.830T>C(V277A)	0.003	T // C	A // B	0.997	0.003	NaN	N	snp	100	1			N/D		N/D
818	AM_11888	rs909530	1	171083174	FMO3_c.855C>T(N285N)	0.182	C // T	A // B	0.818	0.182	NaN	N	snp	100	1			0.279 (T)		0.279 (T)
819	AM_11889	rs2066536	1	171083225	FMO3_c.906C>T(N302N)	0	C // T	A // B	1	0	NaN	N	snp	100	1
820	AM_11890	rs61753344	1	171083232	FMO3_c.913G>T(E305X)	0	G // T	A // B	1	0	NaN	N	snp	84.9	1
821	AM_11891	rs2266780	1	171083242	FMO3_c.923A>G(E308G)	0.045	A // G	A // B	0.955	0.045	NaN	N	snp	100	1			0.217 (G)		0.163 (G)
822	AM_11892	rs72549330	1	171083259	FMO3_c.940G>T(E314X)	0	G // T	A // B	1	0	NaN	N	snp	100	1
823	AM_11893	rs28363581	1	171083398	FMO3_c.1079T>C(L360P)	0	C // T	A // B	0	1	NaN	N	snp	100	1
824	AM_11894	rs2066532	1	171083403	FMO3_c.1084G>C(E362Q)	0	C // G	A // B	0	1	NaN	N	snp	100	1			N/D		N/D
825	AM_11895	rs72549331	1	171083479	FMO3_c.1160G>T(R387L)	0	G // T	A // B	1	0	NaN	N	snp	100	1
826	AM_11902	rs1050906	1	171086441	FMO3_c.1458A>G(I486M)	0	A // G	A // B	1	0	NaN	N	snp	100	1
827	AM_11903	rs72549334	1	171086457	FMO3_c.1474C>T(R492W)	0	C // T	A // B	1	0	NaN	N	snp	100	1
828	AM_11905	rs72549335	1	171086490	FMO3_c.1507G>A(G503R)	0	G // A	A // B	1	0	NaN	N	snp	100	1
829	AM_11912	rs1736565	1	171112490	FMO6_906-3127T>C	0.48	C // T	A // B	0.48	0.52	NaN	N	snp	100	1			0.456 (C )		0.372 (C )
830	AM_11913	rs2272797	1	171118840	FMO6_1232G>A	0.059	A // G	A // B	0.059	0.941	NaN	N	snp	99.4	1			0.125 (A)		0.167 (A)
831	AM_11914	rs7889839	1	171121173	FMO6_1415A>G	0.06	A // G	A // B	0.94	0.06	NaN	N	snp	100	1			0.173 (G)		0.174 (G)
832	AM_11915	rs7886938	1	171121268	FMO6_1510G>A	0.06	A // G	A // B	0.06	0.94	NaN	N	snp	100	1			0.176 (A)		0.179 (A)
833	AM_11925	rs2020870	1	171154959	FMO2_c.107A>G(D36G)	0.198	A // G	A // B	0.802	0.198	NaN	N	snp	100	1			0.062 (G)		0.140 (G)
834	AM_11927	rs55708639	1	171162516	FMO2_c.175G>A(V59I)	0	A // G	A // B	0	1	NaN	N	snp	100	1
835	AM_11929	rs2020868	1	171162551	FMO2_c.210_211insGAC(70InsD)	0.091	- // GAC	A // B	0.909	0.091	NaN	N	in-del	99.9	1			N/D		N/D
836	AM_11931	rs2020860	1	171162583	FMO2_c.242T>C(F81S)	0.091	C // T	A // B	0.091	0.909	NaN	N	snp	100	1			0.049 (C )		0.011 (C )
837	AM_11933	rs28369860	1	171165803	FMO2_c.337delG(V113X)	0.091	- // G	A // B	0.091	0.909	NaN	N	in-del	100	1			N/D		N/D
838	AM_11936	rs2307492	1	171168545	FMO2_c.545T>C(F182S)	0.085	C // T	A // B	0.085	0.915	NaN	N	snp	100	1			0.102 (C )		0.070 (C )
839	AM_11938	rs2020861	1	171168585	FMO2_c.585A>G(S195S)	0.447	G // A	A // B	0.553	0.447	NaN	N	snp	100	1			0.5		0.233 (G)
840	AM_11940	rs28369895	1	171173089	FMO2_c.713G>A(R238Q)	0.002	G // A	A // B	0.998	0.002	NaN	N	snp	100	1			0.013 (A)		0.012 (A)
841	AM_11941	rs2020866	1	171173121	FMO2_c.745C>T(R249X)	0.001	C // T	A // B	0.999	0.001	NaN	N	snp	98.3	1			N/D		N/D
842	AM_11942	rs2020863	1	171174531	FMO2_c.941A>G(E314G)	0.115	A // G	A // B	0.885	0.115	NaN	N	snp	98.9	1			0.093 (G)		0.279 (G)
843	AM_11943	rs7536646	1	171174691	FMO2_c.1101G>A(A367A)	0.03	A // G	A // B	0.03	0.97	NaN	N	snp	100	1			N/D		N/D
844	AM_11944	rs72549336	1	171174750	FMO2_c.1160_1161ins8(R387X)	0	- // TCAAGCTC	A // B	1	0	NaN	N	in-del	100	1
845	AM_11945	rs28369899	1	171174762	FMO2_c.1172G>C(R391T)	0.017	C // G	A // B	0.017	0.983	NaN	N	snp	100	1			N/D		N/D
846	AM_11947	rs6671692	1	171176879	FMO2_c.1206G>A(E402E)	0.03	A // G	A // B	0.03	0.97	NaN	N	snp	99.7	1			N/D		N/D
847	AM_11948	rs2020865	1	171176912	FMO2_c.1239T>G(N413K)	0.096	T // G	A // B	0.904	0.096	NaN	N	snp	100	1			0.034 (G)		N/D
848	AM_11958	rs6661174	1	171178090	FMO2_23238T>C(X472Q)	0.029	C // T	A // B	0.029	0.971	NaN	N	snp	100	1			N/D		N/D
849	AM_11959	rs2020869	1	171178152	FMO2_c.*60A>G	0.108	A // G	A // B	0.892	0.108	NaN	N	snp	100	1			0.133 (G)		0.233 (G)
850	AM_11960	rs72549337	1	171178205	FMO2_c.*113_*114insT	0	- // T	A // B	1	0	NaN	N	in-del	100	1
851	AM_11966	rs6664553	1	171179025	FMO2_c.*933T>C	0.029	T // C	A // B	0.971	0.029	NaN	N	snp	100	1			N/D		N/D
852	AM_11968	rs7512785	1	171179287	FMO2_c.*1195C>T	0.325	C // T	A // B	0.675	0.325	NaN	N	snp	100	1			0.308 (T)		0.344 (T)
853	AM_11970	rs7515157	1	171179477	FMO2_c.*1385C>T	0.355	T // C	A // B	0.355	0.645	NaN	N	snp	99.9	1			0.268 (T)		0.345 (T)
854	AM_12009	rs56841822	1	171236840	FMO1_c.291C>G(H97Q)	0.001	C // G	A // B	0.999	0.001	NaN	N	snp	100	1			N/D		N/D
855	AM_12017	rs742350	1	171250044	FMO1_c.747C>T(T249T)	0.202	T // C	A // B	0.202	0.798	NaN	N	snp	100	1			0.156 (A)		0.035 (A)
856	AM_12018	rs16864314	1	171251196	FMO1_c.907A>G(I303V)	0.018	A // G	A // B	0.982	0.018	NaN	N	snp	100	1			N/D		N/D
857	AM_12023	rs1126692	1	171252287	FMO1_c.1188A>G(V396V)	0.214	G // A	A // B	0.214	0.786	NaN	N	snp	99.7	1			147 (G)		0.033 (G)
858	AM_12027	rs60639054	1	171254588	FMO1_c.1504C>T(R502X)	0.001	C // T	A // B	0.999	0.001	NaN	N	snp	99.9	1			N/D		N/D
859	AM_12028	rs12954	1	171254794	FMO1_c.*111C>T	0.1	T // C	A // B	0.1	0.9	NaN	N	snp	100	1			0.203 (A)		0.174 (G)
860	AM_12031	rs7877	1	171254890	FMO1_c.*207C>T	0.323	T // C	A // B	0.323	0.677	NaN	N	snp	100	1			0.358 (A)		0.221 (A)
861	AM_12051	rs3737926	1	171303565	FMO4_c.843C>T(F281F)	0	C // T	A // B	1	0	NaN	N	snp	100	1			N/D		N/D
862	AM_12052	rs3737925	1	171303644	FMO4_c.922A>T(T308S)	0	A // T	A // B	1	0	NaN	N	snp	99.1	1			N/D		N/D
863	AM_12053	rs1042767	1	171303690	FMO4_c.968T>C(V323A)	0.029	T // C	A // B	0.971	0.029	NaN	N	snp	100	1			0.004 (C )		N/D
864	AM_12054	rs61342270	1	171303737	FMO4_c.1015G>C(E339Q)	0.002	C // G	A // B	0.002	0.998	NaN	N	snp	100	1			0.000 (G)		N/D
865	AM_12057	rs7541966	1	171307155	FMO4_c.1250+591C>T	0.14	C // T	A // B	0.86	0.14	NaN	N	snp	95.1	1			0.122 (T)		0.000 (T)
866	AM_12058	rs2223477	1	171308832	FMO4_c.1251-1720A>G	0.397	A // G	A // B	0.603	0.397	NaN	N	snp	80	1			0.407 (G)		0.395 (G)
867	AM_12087	rs3738046	1	226016558	EPHX1_c.128G>C(R43T)	0.001	G // C	A // B	0.999	0.001	NaN	N	snp	100	1			0.000 (C )		0.056 (C )
868	AM_12088	rs2234697	1	226016575	EPHX1_c.145C>T(R49C)	0.003	C // T	A // B	0.997	0.003	NaN	N	snp	100	1			0.000 (T)		0.000 (T)
869	AM_12089	rs2234698	1	226019500	EPHX1_c.204T>C(D68D)	0.001	C // T	A // B	0.001	0.999	NaN	N	snp	100	1			0.013 (C )		0.000 (C )
870	AM_12090	rs4986931	1	226019586	EPHX1_c.290G>A(W97X)	0	G // A	A // B	1	0	NaN	N	snp	100	1
871	AM_12091	rs2234699	1	226019599	EPHX1_c.303T>C(F101F)	0	C // T	A // B	0	1	NaN	N	snp	100	1
872	AM_12092	rs1051740	1	226019633	EPHX1_c.337T>C(Y113H)	0.232	C // T	A // B	0.232	0.768	NaN	N	snp	99.6	1			0.330 (C )		0.467 (C )
873	AM_12093	rs2292566	1	226019653	EPHX1_c.357G>A(K119K)	0.094	A // G	A // B	0.094	0.906	NaN	N	snp	100	1			???		???
874	AM_12105	rs2292568	1	226027659	EPHX1_c.852C>T(P284P)	0.04	C // T	A // B	0.96	0.04	NaN	N	snp	100	1			0.032 (T)		0.163 (T)
875	AM_12108	rs1051741	1	226032229	EPHX1_c.1071C>T(N357N)	0.071	C // T	A // B	0.929	0.071	NaN	N	snp	100	1			0.128 (T)		0.05 (T)
876	AM_12112	rs2234700	1	226032896	EPHX1_c.1216T>C(L406L)	0.006	T // C	A // B	0.994	0.006	NaN	N	snp	99.7	1			0.000 (C )		N/D
877	AM_12113	rs4149229	1	226032928	EPHX1_c.1248G>A(K416K)	0.009	A // G	A // B	0.009	0.991	NaN	N	snp	100	1			0.000 (A)		0.058 (A)
878	AM_12114	rs4149230	1	226033030	EPHX1_c.1350G>C(S450S)	0.037	C // G	A // B	0.037	0.963	NaN	N	snp	100	1			0.016 (C )		0.158 (C )
879	AM_12123	rs5584	20	48124462	PTGIS_c.1498C>T(P500S)	0	T // C	A // B	0	1	NaN	N	snp	99.9	1
880	AM_12124	rs5630	20	48127684	PTGIS_c.1239C>T(D413D)	0	C // T	A // B	1	0	NaN	N	snp	100	1
881	AM_12125	rs56195291	20	48129688	PTGIS*4_c.1135C>A(R379S)	0	A // C	A // B	0	1	NaN	N	snp	100	1
882	AM_12126	rs5629	20	48129706	PTGIS_c.1117C>A(R373R)	0.317	C // A	A // B	0.683	0.317	NaN	N	snp	100	1			0.226 (A)		0.189 (A)
883	AM_12127	rs5627	20	48140727	PTGIS_c.723A>G(L241L)	0.007	A // G	A // B	0.993	0.007	NaN	N	snp	99.7	1			0.000 (G)		0.000 (G)
884	AM_12128	rs5626	20	48140744	PTGIS_c.706C>T(R236C)	0.001	C // T	A // B	0.999	0.001	NaN	N	snp	100	1			0.000 (T)		0.000 (T)
885	AM_12129	rs5625	20	48156189	PTGIS_c.591C>T(R197R)	0.005	T // C	A // B	0.005	0.995	NaN	N	snp	99.9	1			0.000 (T)		0.033 (T)
886	AM_12130	rs5624	20	48160852	PTGIS_c.511T>C(F171L)	0	T // C	A // B	1	0	NaN	N	snp	100	1
887	AM_12131	rs5623	20	48160902	PTGIS_c.461A>C(E154A)	0	C // A	A // B	0	1	NaN	N	snp	100	1
888	AM_12132	rs6067121	20	48160961	PTGIS_c.402G>T(Q134H)	0	T // G	A // B	0	1	NaN	N	snp	100	1
889	AM_12133	rs5622	20	48164401	PTGIS*3_c.354T>A(S118R)	0.004	T // A	A // B	0.996	0.004	NaN	N	snp	100	1			0.000 (T)		0.000 (T)
890	AM_12134	rs5621	20	48164497	PTGIS_c.258G>T(V86V)	0	T // G	A // B	0	1	NaN	N	snp	100	1			0.017 (T)		0.000 (T)
891	AM_12136	rs3834669	20	52771092	CYP24A1_19027delA	0	- // A	A // B	0	1	NaN	N	in-del	100	1			N/D		N/D
892	AM_12137	rs4809957	20	52771171	CYP24A1_18948C>T	0.169	T // C	A // B	0.831	0.169	NaN	N	snp	99.4	1			0.150 (G)		0.425 (A)
893	AM_12138	rs3171182	20	52771215	CYP24A1_18904G>A	0	A // G	A // B	0	1	NaN	N	snp	100	1			0.000 (A)		N/D
894	AM_12139	rs6068811	20	52771250	CYP24A1_18869C>T	0	T // C	A // B	0	1	NaN	N	snp	100	1			0.000 (A)		N/D
895	AM_12140	rs2762934	20	52771261	CYP24A1_18858C>T	0.35	T // C	A // B	0.35	0.65	NaN	N	snp	99.9	1			0.181 (A)		0.093 (A)
896	AM_12141	rs6068812	20	52774635	CYP24A1_15484T>C(L409S)	0	C // T	A // B	0	1	NaN	N	snp	100	1			0.004 (G)		0.000 (G)
897	AM_12145	rs6068816	20	52781091	CYP24A1_9028G>A(T248T)	0.108	A // G	A // B	0.108	0.892	NaN	N	snp	100	1			0.100 (T)		0.400 (T)
898	AM_12147	rs2296241	20	52786219	CYP24A1_3900C>T(A184A)	0.389	C // T	A // B	0.389	0.611	NaN	N	snp	100	1			0.465 (G)		0.442 (A)
899	AM_12159	rs6090151	20	61288423	SLCO4A1_c.617G>A(R206K)	0	A // G	A // B	0	1	NaN	N	snp	100	1			0.023 (A)		0.024 (A)
900	AM_12160	rs2236553	20	61289743	SLCO4A1_c.797-286T>C	0.267	C // T	A // B	0.267	0.733	NaN	N	snp	98.6	1			0.176 (C )		0.156 (C )
901	AM_12161	rs6090189	20	61299341	SLCO4A1_c.1639-23G>A	0	G // A	A // B	1	0	NaN	N	snp	100	1			0.000 (A)		N/D
902	AM_12162	rs6090200	20	61303290	SLCO4A1_c.*45C>T	0	C // T	A // B	1	0	NaN	N	snp	100	1			0.000 (T)		0.000 (T)
903	AM_12165	rs3787537	20	61303742	SLCO4A1_c.*497C>T	0.204	T // C	A // B	0.204	0.796	NaN	N	snp	100	1			0.267 (A)		0.433 (A)
904	AM_12167	rs1143663	21	37442675	CBR1_c.262G>A(V88I)	0	A // G	A // B	0	1	NaN	N	snp	100	1			0.005 (A)		0.012 (A)
905	AM_12168	rs41557318	21	37443349	CBR1_c.391C>T(P131S)	0	T // C	A // B	0	1	NaN	N	snp	100	1			0.017 (T)		N/D
906	AM_12169	rs1005695	21	37443565	CBR1_c.397+210C>G	0.251	G // C	A // B	0.251	0.749	NaN	N	snp	100	1			0.425 (C )		0.279 (G)
907	AM_12170	rs3787728	21	37443893	CBR1_c.397+538C>T	0.197	C // T	A // B	0.803	0.197	NaN	N	snp	100	1			0.292 (T)		0.477 (C )
908	AM_12171	rs2835265	21	37444696	CBR1_c.398-48C>T	0.02	C // T	A // B	0.98	0.02	NaN	N	snp	100	1			0.106 (T)		0.209 (T)
909	AM_12172	rs998383	21	37445739	CBR1_c.*559C>G	0.347	C // G	A // B	0.653	0.347	NaN	N	snp	98.4	1			0.389 (C )		0.279 (C )
910	AM_12174	rs8133052	21	37507501	CBR3_c.11G>A(C4Y)	0.305	A // G	A // B	0.305	0.695	NaN	N	snp	100	1			0.464 (G)		0.464 (G)
911	AM_12175	rs9282628	21	37507740	CBR3_c.250C>G(L84V)	0.04	C // G	A // B	0.96	0.04	NaN	N	snp	99.9	1			0.017 (G)		N/D
912	AM_12176	rs2835285	21	37507767	CBR3_c.277G>A(V93I)	0	A // G	A // B	0	1	NaN	N	snp	99.7	1			0.017 (A)		0.000 (A)
913	AM_12177	rs16993929	21	37510224	CBR3_c.391C>T(P131S)	0.009	T // C	A // B	0.009	0.991	NaN	N	snp	99.9	1			0.000 (T)		0.012 (T)
914	AM_12178	rs2835286	21	37518362	CBR3_c.398-12G>A	0.157	A // G	A // B	0.157	0.843	NaN	N	snp	99.9	1			0.164 (A)		0.140 (A)
915	AM_12181	rs1056892	21	37518706	CBR3_c.730G>A(V244M)	0.466	A // G	A // B	0.534	0.466	NaN	N	snp	100	1			0.314 (A)		0.326 (A)
916	AM_12204	rs492338	21	43701977	ABCG1_c.589-407A>G	0.384	G // A	A // B	0.616	0.384	NaN	N	snp	100	1			0.496 (T)		0.419 (C )
917	AM_12205	rs3788007	21	43706776	ABCG1_c.973+672G>A	0.322	G // A	A // B	0.678	0.322	NaN	N	snp	100	1			0.159 (A)		0.244 (A)
918	AM_12206	rs425215	21	43707101	ABCG1_c.974-898C>G	0.483	G // C	A // B	0.517	0.483	NaN	N	snp	100	1			0.458 (G)		0.205 (C )
919	AM_12207	rs914189	21	43710909	ABCG1_c.1430-293C>G	0.152	C // G	A // B	0.848	0.152	NaN	N	snp	100	1			0.159 (G)		0.267 (G)
920	AM_12208	rs3788010	21	43716022	ABCG1_c.1809-252G>A	0.444	A // G	A // B	0.444	0.556	NaN	N	snp	100	1			0.429 (G		0.453 (G)
921	AM_12209	rs1044317	21	43716901	ABCG1_c.*399G>A	0.49	A // G	A // B	0.49	0.51	NaN	N	snp	99.9	1			0.473 (A)		0.477 (A)
922	AM_12210	rs1541290	21	43718483	ABCG1_c.*1981G>A	0.363	A // G	A // B	0.363	0.637	NaN	N	snp	100	1			0.496 (A)		0.453 (G)
923	AM_12213	rs57725551	21	46945782	SLC19A1_c.1242C>A(I414I)	0.006	C // A	A // B	0.994	0.006	NaN	N	snp	100	1			0.000 (T)		N/D
924	AM_12214	rs12659	21	46951556	SLC19A1_c.696T>C(P232P)	0.387	C // T	A // B	0.613	0.387	NaN	N	snp	81.9	1			0.417 (T)		0.467 (C )
925	AM_12215	rs1051269	21	46952006	SLC19A1_c.246C>G(P82P)	0.001	G // C	A // B	0.001	0.999	NaN	N	snp	97.1	1			0.017 (G)		N/D
926	AM_12216	rs1051266	21	46957794	SLC19A1_c.80A>G(H27R)	0.498	A // G	A // B	0.502	0.498	NaN	N	snp	96.3	1			0.438 (A)		0.488 (G)
927	AM_12217	rs60881836	21	46961496	SLC19A1_c.-50+786A>G	0.002	G // A	A // B	0.002	0.998	NaN	N	snp	100	1			0.000 (C )		N/D
928	AM_12220	rs4633	22	19950235	COMT_c.36C>T(H12H)	0.456	C // T	A // B	0.456	0.544	NaN	N	snp	100	1			0.483 (C )		0.233 (T)
929	AM_12225	rs5031015	22	19951103	COMT_c.154G>A(A52T)	0	A // G	A // B	0	1	NaN	N	snp	99.9	1			0.000 (A)		0.000 (A)
930	AM_12228	rs8192488	22	19951237	COMT_c.288C>T(A96A)	0.023	C // T	A // B	0.977	0.023	NaN	N	snp	99.7	1			N/D		N/D
931	AM_12229	rs4680	22	19951271	COMT_c.322G>A(V108M)	0.46	A // G	A // B	0.54	0.46	NaN	N	snp	98	1			0.478 (A)		0.233 (A)
932	AM_12230	rs769224	22	19951804	COMT_c.447G>A(P149P)	0.033	G // A	A // B	0.967	0.033	NaN	N	snp	96.3	1			0.009 (A)		0.105 (A)
933	AM_12232	rs364069	22	24302486	GSTT2_c.195C>T(T65T)	0	C // T	A // B	1	0	NaN	N	snp	100	1			N/D		N/D
934	AM_12233	rs364069	22	24323221	GSTT2_c.195C>T(T65T)_alternate	0	G // A	A // B	1	0	NaN	N	snp	100	1			N/D		N/D
935	AM_12235	rs72549344	22	24324821	GSTT2_c.203G>A(S68L)	0.001	G // A	A // B	0.999	0.001	NaN	N	snp	100	1			N/D		N/D
936	AM_12237	rs1622002	22	24325127	GSTT2_c.417C>T(M139I)	0.101	C // T	A // B	0.899	0.101	NaN	N	snp	100	1			0.017 (A)		N/D
937	AM_12238	rs2234953	22	24376833	GSTT1_c.517G>A(E173K)	0	G // A	A // B	1	0	NaN	N	snp	99.9	1			N/D		N/D
938	AM_12239	rs2266637	22	24376845	GSTT1_c.505G>A(V169I)	0.019	G // A	A // B	0.981	0.019	NaN	N	snp	99.7	1			N/D		N/D
939	AM_12241	rs2266636	22	24376996	GSTT1_c.354G>A(V118V)	0	G // A	A // B	1	0	NaN	N	snp	99.9	1			N/D		N/D
940	AM_12242	rs11550605	22	24379402	GSTT1*B_c.310A>C(T104P)	0	C // A	A // B	0	1	NaN	N	snp	100	1			N/D		N/D
941	AM_12243	rs17856199	22	24381766	GSTT1_c.134T>G(F45C)	0	T // G	A // B	1	0	NaN	N	snp	100	1			0.000 (C )		0.000 (C )
942	AM_12245	rs2266635	22	24384171	GSTT1_c.61G>A(A21T)	0	G // A	A // B	1	0	NaN	N	snp	99.9	1			N/D		0.006 (A)
943	AM_12247	rs1135840	22	42522613	CYP2D6_4180G>C(S486T)	0.413	G // C	A // B	0.413	0.587	NaN	N	snp	100	1			0.433 (G)		0.308 (G)
944	AM_12248	rs1135836	22	42522660	CYP2D6*18_4125dupGTGCCCACT	0	T // TGTGCCCACT	A // B	1	0	NaN	Y	in-del	100	1			N/D		N/D
945	AM_12252	rs72549346	22	42523533	CYP2D6*42_3259insGT	0	- // GT	A // B	1	0	NaN	Y	in-del	100	1			N/D		N/D
946	AM_12254	rs72549347	22	42523592	CYP2D6*56_3201C>T(R344X)	0	C // T	A // B	1	0	NaN	Y	snp	100	1			N/D		N/D
947	AM_12255	rs59421388	22	42523610	CYP2D6*29_3183G>A(V338M)	0.014	G // A	A // B	0.986	0.014	NaN	Y	snp	99.9	1			0.032 (T)		N/D
948	AM_12257	rs28371725	22	42523805	CYP2D6*41_2988G>A(SpliceDefect)	0.174	G // A	A // B	0.826	0.174	NaN	Y	snp	98.3	1			0.075 (A)		N/D
949	AM_12258	rs72549349	22	42523843	CYP2D6*44_2950G>C(SpliceDefect)	0	C // G	A // B	0	1	NaN	Y	snp	99.6	1			N/D		N/D
950	AM_12259	rs5030867	22	42523858	CYP2D6*7_2935A>C(H324P)	0	A // C	A // B	1	0	NaN	Y	snp	100	1			0.000 (C )		N/D
951	AM_12261	rs16947	22	42523943	CYP2D6_2850C>T(R296C)	0.488	T // C	A // B	0.488	0.512	NaN	Y	snp	98.7	1			0.333 (A)		0,.169 (A)
952	AM_12264	rs28371720	22	42524178	CYP2D6*9_2615delAAG	0.002	- // AGA	A // B	0.002	0.998	NaN	Y	in-del	98.3	1			N/D		N/D
953	AM_12265	rs72549351	22	42524203	CYP2D6*38_2587delGACT	0	- // GACT	A // B	0	1	NaN	Y	in-del	99.9	1			N/D		N/D
954	AM_12266	rs72549352	22	42524213	CYP2D6*21_2573insC	0	- // C	A // B	1	0	NaN	Y	in-del	58.3	1			N/D		N/D
955	AM_12267	rs35742686	22	42524244	CYP2D6*3_2549delA(R259X)	0	- // A	A // B	0	1	NaN	Y	in-del	100	1			N/D		N/D
956	AM_12268	rs72549353	22	42524251	CYP2D6*19_2539delAACT	0	- // AACT	A // B	0	1	NaN	Y	in-del	99.9	1			N/D		N/D
957	AM_12270	rs72549354	22	42524819	CYP2D6*20_1973insG	0	- // G	A // B	1	0	NaN	Y	in-del	99.6	1			N/D		N/D
958	AM_12272	rs72549356	22	42524929	CYP2D6*40_1863ins(TTTCGCCCC)2	0.004	- // TTTCGCCCCTTTCGCCCC	A // B	0.996	0.004	NaN	Y	in-del	99.6	1			N/D		N/D
959	AM_12274	rs3892097	22	42524947	CYP2D6*4_1846G>A(SpliceDefect)	0.069	G // A	A // B	0.931	0.069	NaN	Y	snp	99	1		0.5	0.242 (A)		0.006 (A)
960	AM_12276	rs5030655	22	42525086	CYP2D6*6_1707delT(W152X)	0.001	- // T	A // B	0.001	0.999	NaN	Y	in-del	98.1	1			N/D		N/D
961	AM_12277	rs1058164	22	42525132	CYP2D6_1661G>C(V136V)	0.41	C // G	A // B	0.59	0.41	NaN	Y	snp	99.4	1		0.5	0.333 (G)		0.208 (G)
962	AM_12278	rs61736512	22	42525134	CYP2D6*29_1659G>A(V136I)	0.019	A // G	A // B	0.019	0.981	NaN	Y	snp	56.5	1			N/D		N/D
963	AM_12280	rs28371706	22	42525772	CYP2D6_1023C>T(T107I)	0.042	T // C	A // B	0.042	0.958	NaN	Y	snp	99.9	1			0.016 (T)		0.000 (T)
964	AM_12281	rs5030863	22	42525912	CYP2D6*11_883G>C(SpliceDefect)	0	G // C	A // B	1	0	NaN	Y	snp	100	1			N/D		N/D
965	AM_12283	rs72549357	22	42526657	CYP2D6*15_137insT	0	T // TT	A // B	1	0	NaN	Y	in-del	99.7	1			???		???
966	AM_12284	rs5030862	22	42526670	CYP2D6*12_124G>A(G42R)	0	G // A	A // B	1	0	NaN	Y	snp	100	1			N/D		N/D
967	AM_12285	rs1065852	22	42526694	CYP2D6_100C>T(P34S)	0.103	T // C	A // B	0.103	0.897	NaN	Y	snp	100	1			0.225 (T)		0.283 (C )
968	AM_12291	rs1080985	22	42528382	CYP2D6_-1584C>G	0.188	G // C	A // B	0.188	0.812	NaN	N	snp	100	1			0.267 (G)		0.133 (G)
969	AM_12303	rs138056	22	44220673	SULT4A1_c.*1208G>T	0.301	T // G	A // B	0.301	0.699	NaN	N	snp	98.7	1			0.199 (A)		0.116 (A)
970	AM_12304	rs138057	22	44221247	SULT4A1_c.*634T>C	0.306	T // C	A // B	0.694	0.306	NaN	N	snp	100	1			0.204 (G)		0.083 (G)
971	AM_12305	rs3179394	22	44221471	SULT4A1_c.*410G>T	0	T // G	A // B	0	1	NaN	N	snp	100	1			0.000 (T)		N/D
972	AM_12307	rs11542811	22	44234791	SULT4A1_c.464G>A(R155Q)	0	G // A	A // B	1	0	NaN	N	snp	100	1			0.018 (A)		0.024 (A)
973	AM_12308	rs17852027	22	44235828	SULT4A1_c.378C>A(S126S)	0	C // A	A // B	1	0	NaN	N	snp	100	1			0.000 (T)		N/D
974	AM_12316	rs743616	22	51064039	ARSA_c.1172C>G(T391S)	0.308	G // C	A // B	0.308	0.692	NaN	N	snp	100	1			0.425 (G)		0.344 (C )
975	AM_12317	rs6151422	22	51064399	ARSA_c.1066T>G(F356V)	0	T // G	A // B	1	0	NaN	N	snp	100	1			0.009 (G)		0.000 (G)
976	AM_12319	rs28940894	22	51064699	ARSA_c.856A>C(T286P)	0	C // A	A // B	0	1	NaN	N	snp	100	1			N/D		N/D
977	AM_12321	rs6151411	22	51065808	ARSA_c.245C>T(P82L)	0	C // T	A // B	1	0	NaN	N	snp	100	1			0.000 (T)		N/D
978	AM_12322	rs131713	22	51068560	ARSA_c.-1953C>T	0.17	C // T	A // B	0.83	0.17	NaN	N	snp	100	1			0.407 (T)		0.395 (T)
979	AM_12323	rs7081	2	27422605	SLC5A6_c.*699A>G	0.149	G // A	A // B	0.149	0.851	NaN	N	snp	100	1			0.062 (G)		0.000 (G)
980	AM_12326	rs1064845	2	27424603	SLC5A6_c.1475G>A(S492N)	0.011	A // G	A // B	0.011	0.989	NaN	N	snp	100	1			0.000 (A)		0.000 (A)
981	AM_12327	rs1395	2	27424636	SLC5A6_c.1442T>C(F481S)	0.494	T // C	A // B	0.506	0.494	NaN	N	snp	99.9	1			0.274 (G)		0.140 (G)
982	AM_12331	rs4327199	2	27424892	SLC5A6_c.1326C>T(F442F)	0	T // C	A // B	0	1	NaN	N	snp	100	1			N/D		N/D
983	AM_12335	rs1275523	2	27427402	SLC5A6_c.932T>C(I311T)	0	T // C	A // B	1	0	NaN	N	snp	100	1			N/D		N/D
984	AM_12337	rs1275524	2	27428295	SLC5A6_c.657C>T(I219I)	0	C // T	A // B	1	0	NaN	N	snp	100	1			0.008 (A)		0.017 (A)
985	AM_12342	rs56970590	2	27430237	SLC5A6_c.282A>G(R94R)	0.065	A // G	A // B	0.935	0.065	NaN	N	snp	100	1			0.050 (C )		0.000 (C )
986	AM_12358	rs2295474	2	31558873	XDH_c.3953G>A(C1318Y)	0	G // A	A // B	1	0	NaN	N	snp	100	1			0.004 (T)		0.012 (T)
987	AM_12361	rs207440	2	31562412	XDH_c.3717G>A(E1239E)	0.071	A // G	A // B	0.071	0.929	NaN	N	snp	100	1			0.062 (A)		0.012 (A)
988	AM_12364	rs1042036	2	31565119	XDH_c.3449C>G(P1150R)	0	C // G	A // B	1	0	NaN	N	snp	100	1			N/D		N/D
989	AM_12370	rs1884725	2	31571786	XDH_c.3030C>T(F1010F)	0.226	C // T	A // B	0.774	0.226	NaN	N	snp	100	1			0.217 (A)		0.093 (A)
990	AM_12372	rs669884	2	31572992	XDH_c.2729C>A(T910K)	0	A // C	A // B	0	1	NaN	N	snp	99.9	1			N/D		N/D
991	AM_12373	rs566362	2	31572994	XDH_c.2727C>A(N909K)	0	C // A	A // B	1	0	NaN	N	snp	100	1			N/D		N/D
992	AM_12385	rs2295475	2	31589847	XDH_c.2211C>T(I737I)	0.197	C // T	A // B	0.803	0.197	NaN	N	snp	100	1			0.042 (A)		0.042 (A)
993	AM_12414	rs4407290	2	31606670	XDH_c.837C>T(V279V)	0.023	T // C	A // B	0.023	0.977	NaN	N	snp	100	1			0.048		0.073
994	AM_12451	rs72549374	2	38298070	CYP1B1_4435del25	0	- // GGCGGTGCATTGGCGAAGAACTTTC	A // B	0	1	NaN	N	in-del	100	1			N/D		N/D
995	AM_12452	rs28936701	2	38298092	CYP1B1*25_4437C>T(R469W)	0	C // T	A // B	1	0	NaN	N	snp	99.9	1			N/D		N/D
996	AM_12454	rs1800440	2	38298139	CYP1B1*4_4390A>G(N453S)	0.076	A // G	A // B	0.924	0.076	NaN	N	snp	98.4	1			???		???
997	AM_12456	rs72549375	2	38298152	CYP1B1*24_4377delG(D449X)	0	- // G	A // B	0	1	NaN	N	in-del	100	1			???		???
998	AM_12458	rs4986888	2	38298169	CYP1B1*7_4360C>G(A443G)	0.009	C // G	A // B	0.991	0.009	NaN	N	snp	100	1			0.008 (G)		0.000 (G)
999	AM_12460	rs56175199	2	38298187	CYP1B1*23_4342C>T(P437L)	0	T // C	A // B	0	1	NaN	N	snp	100	1			0.000 (A)		0.006 (A)
1000	AM_12461	rs1056836	2	38298203	CYP1B1*3_4326C>G(L432V)	0.373	C // G	A // B	0.627	0.373	NaN	N	snp	100	1			0.400 (G)		0.100 (G)
1001	AM_12462	rs72549377	2	38298288	CYP1B1_4231del10	0	- // TCATGCCACC	A // B	0	1	NaN	N	in-del	100	1			???		???
1002	AM_12465	rs56010818	2	38298328	CYP1B1*21_4201G>A(R390H)	0	G // A	A // B	1	0	NaN	N	snp	100	1			N/D		N/D
1003	AM_12466	rs55989760	2	38298338	CYP1B1*20_4191G>A(E387K)	0	G // A	A // B	1	0	NaN	N	snp	100	1			N/D		N/D
1004	AM_12467	rs56305281	2	38298361	CYP1B1*19_4168C>T(P379L)	0	T // C	A // B	0	1	NaN	N	snp	100	1			N/D		N/D
1005	AM_12469	rs4398252	2	38298383	CYP1B1_4146A>G(M372V)	0	G // A	A // B	0	1	NaN	N	snp	100	1			0.000 (C )		0.000 (C )
1006	AM_12471	rs55771538	2	38298404	CYP1B1*18_4125G>T(G365W)	0	T // G	A // B	0	1	NaN	N	snp	100	1			N/D		N/D
1007	AM_12473	rs72549380	2	38298421	CYP1B1*17_4096del13(RVQAE355X)	0	- // GAGTGCAGGCAGA	A // B	0	1	NaN	N	in-del	100	1			N/D		N/D
1008	AM_12474	rs72549381	2	38298434	CYP1B1_4095C>T(R355X)	0	C // T	A // B	1	0	NaN	N	snp	100	1			N/D		N/D
1009	AM_12493	rs28936700	2	38302350	CYP1B1*12_182G>A(G61E)	0	G // A	A // B	1	0	NaN	N	snp	100	1			N/D		N/D
1010	AM_12498	rs4987135	2	38302451	CYP1B1_81G>C(L27L)	0	C // G	A // B	0	1	NaN	N	snp	100	1			0.000 (C )		N/D
1011	AM_12521	rs4149522	2	101008949	CHST10_c.*758G>A	0.001	G // A	A // B	0.999	0.001	NaN	N	snp	99.9	1			0.000 (A)		0.047 (A)
1012	AM_12522	rs1057056	2	101009082	CHST10_c.*625G>A	0.076	A // G	A // B	0.076	0.924	NaN	N	snp	100	1			0.004 (A)		0.093 (A)
1013	AM_12523	rs1530031	2	101009326	CHST10_c.*381G>A	0.367	G // A	A // B	0.367	0.633	NaN	N	snp	99	1			0.487 (A)		0.214 (A)
1014	AM_12524	rs1057055	2	101009376	CHST10_c.*331T>C	0	C // T	A // B	0	1	NaN	N	snp	100	1			N/D		N/D
1015	AM_12526	rs1530030	2	101009600	CHST10_c.*107C>T	0.288	C // T	A // B	0.712	0.288	NaN	N	snp	98.1	1			0.491 (C )		0.302 (C )
1016	AM_12527	rs4149521	2	101009668	CHST10_c.*39T>C	0	C // T	A // B	0	1	NaN	N	snp	100	1			0.000 (C )		0.081 (C )
1017	AM_12528	rs3748934	2	101009908	CHST10_c.870C>T(A290A)	0.007	C // T	A // B	0.993	0.007	NaN	N	snp	100	1			0.000 (T)		0.047 (T)
1018	AM_12529	rs3748933	2	101009983	CHST10_c.795G>A(T265T)	0	A // G	A // B	0	1	NaN	N	snp	100	1			0.000 (A)		0.033 (A)
1019	AM_12530	rs3748932	2	101010006	CHST10_c.772G>A(D258N)	0	A // G	A // B	0	1	NaN	N	snp	100	1			0.000 (A)		0.012 (A)
1020	AM_12531	rs3748931	2	101010043	CHST10_c.735C>T(G245G)	0	C // T	A // B	1	0	NaN	N	snp	100	1			0.000 (T)		0.070 (T)
1021	AM_12532	rs3748930	2	101010082	CHST10_c.696G>C(T232T)	0.371	C // G	A // B	0.629	0.371	NaN	N	snp	99.9	1			0.458 (G)		0.200 (G)
1022	AM_12533	rs4149520	2	101012060	CHST10_c.444T>C(I148I)	0	C // T	A // B	0	1	NaN	N	snp	100	1			0.000 (C )		0.012 (C )
1023	AM_12534	rs1465829	2	101019031	CHST10_c.187C>T(L63L)	0.007	T // C	A // B	0.007	0.993	NaN	N	snp	100	1			0.000 (A)		0.047 (A)
1024	AM_12535	rs3828193	2	101031561	CHST10_c.-91C>A	0.282	A // C	A // B	0.282	0.718	NaN	N	snp	100	1			0.478 (C )		0.375 (C )
1025	AM_12557	rs72549391	2	108910712	SULT1C2_c.179A>C(D60A)	0	A // C	A // B	1	0	NaN	N	snp	100	1			N/D		N/D
1026	AM_12560	rs17036058	2	108910751	SULT1C2_c.218G>A(R73Q)	0.017	G // A	A // B	0.983	0.017	NaN	N	snp	100	1			0.025 (A)		0.000 (A)
1027	AM_12568	rs72549392	2	108917348	SULT1C2_c.332C>T(S111F)	0	C // T	A // B	1	0	NaN	N	snp	100	1			N/D		N/D
1028	AM_12574	rs17036104	2	108922036	SULT1C2_c.763T>G(S255A)	0.076	G // T	A // B	0.076	0.924	NaN	N	snp	99.9	1			0.040 (G)		0.058 (G)
1029	AM_12577	rs14700	2	108925077	SULT1C2_c.*157A>T	0	T // A	A // B	0	1	NaN	N	snp	100	1			0.000 (T)		0.000 (T)
1030	AM_12578	rs1047309	2	108925184	SULT1C2_c.*264A>T	0	A // T	A // B	1	0	NaN	N	snp	100	1			0.000 (T)		0.000 (T)
1031	AM_12579	rs3731680	2	108925220	SULT1C2_c.*300A>G	0.078	G // A	A // B	0.078	0.922	NaN	N	snp	100	1			0.040 (C )		0.058 (C )
1032	AM_12580	rs1047310	2	108925749	SULT1C2_c.*829G>C	0	C // G	A // B	0	1	NaN	N	snp	100	1			0.000 (C )		0.000 (C )
1033	AM_12581	rs1047311	2	108925752	SULT1C2_c.*832G>C	0	C // G	A // B	0	1	NaN	N	snp	100	1			N/D		N/D
1034	AM_12586	rs3754926	2	108993719	SULT1C4_c.-1075G>A	0.009	G // A	A // B	0.991	0.009	NaN	N	snp	99.9	1			0.004 (T)		0.000 (T)
1035	AM_12587	rs6739225	2	108994305	SULT1C4_c.-489A>G	0.001	G // A	A // B	0.001	0.999	NaN	N	snp	100	1			0.000 (G)		0.000 (G)
1036	AM_12588	rs4149430	2	108994311	SULT1C4_c.-483C>T	0.003	C // T	A // B	0.997	0.003	NaN	N	snp	100	1			N/D		N/D
1037	AM_12589	rs11569697	2	108994732	SULT1C4_c.-62G>A	0.009	A // G	A // B	0.009	0.991	NaN	N	snp	99.1	1			0.000 (A)		0.000 (A)
1038	AM_12590	rs1402467	2	108994808	SULT1C4_c.15C>G(D5E)	0.347	C // G	A // B	0.653	0.347	NaN	N	snp	99.9	1			0.192 (G)		0.033 (G)
1039	AM_12591	rs13032083	2	108999425	SULT1C4_c.394-124A>G	0	A // G	A // B	1	0	NaN	N	snp	99.9	1			0.000 (G)		0.012 (G)
1040	AM_12592	rs6710340	2	109001295	SULT1C4_c.615+1329A>C	0.002	A // C	A // B	0.998	0.002	NaN	N	snp	100	1			0.000 (C )		0.000 (C )
1041	AM_12629	rs72549393	2	138759723	HNMT_c.388delA(K130X)	0	- // A	A // B	0	1	NaN	N	in-del	100	1			N/D		N/D
1042	AM_12642	rs17851810	2	138771521	HNMT_c.700A>G(N234D)	0	G // A	A // B	0	1	NaN	N	snp	100	1			N/D		N/D
1043	AM_12643	rs1050891	2	138771760	HNMT_c.*60A>G	0.288	G // A	A // B	0.288	0.712	NaN	N	snp	100	1			0.208 (C )		0.271 (C )
1044	AM_12645	rs16840132	2	138772335	HNMT_c.*635G>C	0.001	C // G	A // B	0.001	0.999	NaN	N	snp	100	1			0.000 (C )		0.000 (C )
1045	AM_12646	rs4245861	2	138772694	HNMT_c.*994C>T	0.288	C // T	A // B	0.712	0.288	NaN	N	snp	100	1			0.204 (T)		0.186 (T)
1046	AM_12647	rs4646333	2	138773229	HNMT_c.*1529G>A	0.288	A // G	A // B	0.288	0.712	NaN	N	snp	100	1			0.200 (A)		0.271 (A)
1047	AM_12655	rs496550	2	169779712	ABCB11_c.*420A>G	0.405	A // G	A // B	0.405	0.595	NaN	N	snp	100	1			0.447 (A)		0.349 (A)
1048	AM_12656	rs495714	2	169779764	ABCB11_c.*368G>A	0.405	A // G	A // B	0.595	0.405	NaN	N	snp	100	1			0.447 (G)		0.349 (G)
1049	AM_12657	rs3732038	2	169779851	ABCB11_c.*281T>G	0	T // G	A // B	1	0	NaN	N	snp	100	1			0.000 (C )		N/D
1050	AM_12658	rs473351	2	169779896	ABCB11_c.*236G>A	0.336	A // G	A // B	0.336	0.664	NaN	N	snp	99.9	1			0.434 (A)		0.047 (A)
1051	AM_12660	rs72549394	2	169780295	ABCB11_c.3803G>A(R1268Q)	0	G // A	A // B	1	0	NaN	N	snp	99.9	1			N/D		N/D
1052	AM_12666	rs1521808	2	169783728	ABCB11_c.3556G>A(E1186K)	0.001	A // G	A // B	0.001	0.999	NaN	N	snp	100	1			0.000 (A)		0.000 (A)
1053	AM_12667	rs72549395	2	169783827	ABCB11_c.3457C>T(R1153C)	0	C // T	A // B	1	0	NaN	N	snp	100	1			N/D		N/D
1054	AM_12670	rs72549396	2	169787318	ABCB11_c.3268C>T(R1090X)	0	C // T	A // B	1	0	NaN	N	snp	100	1			N/D		N/D
1055	AM_12672	rs72549397	2	169788931	ABCB11_c.3169C>T(R1057X)	0	C // T	A // B	1	0	NaN	N	snp	100	1			N/D		N/D
1056	AM_12674	rs497692	2	169789016	ABCB11_c.3084A>G(A1028A)	0.404	G // A	A // B	0.596	0.404	NaN	N	snp	99.9	1			0.451 (A)		0.349 (A)
1057	AM_12677	rs72549399	2	169791806	ABCB11_c.2944G>A(G982R)	0	G // A	A // B	1	0	NaN	N	snp	100	1			N/D		N/D
1058	AM_12688	rs11568373	2	169801403	ABCB11_c.2412A>G(A804A)	0.004	G // A	A // B	0.004	0.996	NaN	N	snp	100	1			0.000 (A)		0.000 (A)
1059	AM_12719	rs72549401	2	169826641	ABCB11_c.1723C>T(R575X)	0	C // T	A // B	1	0	NaN	N	snp	100	1			N/D		N/D
1060	AM_12722	rs72549402	2	169828550	ABCB11_c.1445A>G(D482G)	0	A // G	A // B	1	0	NaN	N	snp	100	1			N/D		N/D
1061	AM_12726	rs2287622	2	169830328	ABCB11_c.1331C>T(A444V)	0.424	T // C	A // B	0.424	0.576	NaN	N	snp	100	1			0.362 (T)		0.321 (T)
1062	AM_12739	rs7563233	2	169842746	ABCB11_c.957A>G(G319G)	0.057	G // A	A // B	0.057	0.943	NaN	N	snp	100	1			0.018 (C )		0.000 (C )
1063	AM_12742	rs2287617	2	169847323	ABCB11_c.896G>A(R299K)	0	A // G	A // B	0	1	NaN	N	snp	98	1			0.009 (A)		0.012 (A)
1064	AM_12744	rs2287616	2	169847412	ABCB11_c.807T>C(Y269Y)	0.008	C // T	A // B	0.008	0.992	NaN	N	snp	100	1			0.000 (C )		0.384 (C )
1065	AM_12749	rs72551306	2	169850291	ABCB11_c.713G>T(G238V)	0	T // G	A // B	0	1	NaN	N	snp	99.9	1			N/D		N/D
1066	AM_12762	rs4148777	2	169869901	ABCB11_c.270T>C(F90F)	0.012	C // T	A // B	0.012	0.988	NaN	N	snp	100	1			0.035 (C )		0.081 (C )
1067	AM_12766	rs3815675	2	169870855	ABCB11_c.108T>C(D36D)	0.008	C // T	A // B	0.008	0.992	NaN	N	snp	100	1			0.000 (C )		0.384 (C )
1068	AM_12767	rs4148776	2	169870882	ABCB11_c.99-18T>C	0.053	C // T	A // B	0.053	0.947	NaN	N	snp	100	1			0.053 (C )		0.081 (C )
1069	AM_12771	rs3755162	2	169875245	ABCB11_c.-610C>A	0.012	C // A	A // B	0.988	0.012	NaN	N	snp	100	1			0.035 (T)		0.081 (T)
1070	AM_12772	rs4148771	2	169875534	ABCB11_c.-899delCT	0.028	- // CT	A // B	0.028	0.972	NaN	N	in-del	100	1			N/D		N/D
1071	AM_12775	rs3755163	2	169875539	ABCB11_c.-904C>A	0.03	C // A	A // B	0.97	0.03	NaN	N	snp	92.8	1			0.000 (T)		0.000 (T)
1072	AM_12776	rs7578587	2	169877085	ABCB11_c.-2450A>G	0.017	G // A	A // B	0.017	0.983	NaN	N	snp	100	1			0.000 (C )		0.000 (C )
1073	AM_12778	rs7602171	2	169880178	ABCB11_c.-5543C>T	0.242	T // C	A // B	0.242	0.758	NaN	N	snp	99.6	1			0.274 (A)		0.221 (A)
1074	AM_12780	rs3770602	2	169881691	ABCB11_c.-7056C>T	0.269	T // C	A // B	0.269	0.731	NaN	N	snp	100	1			0.279 (A)		0.221 (A)
1075	AM_12781	rs4148770	2	169882084	ABCB11_c.-7449T>C	0.047	T // C	A // B	0.953	0.047	NaN	N	snp	100	1			0.018 (C )		0.221 (C )
1076	AM_12782	rs3770603	2	169883218	ABCB11_c.-8583G>A	0.14	G // A	A // B	0.86	0.14	NaN	N	snp	99.7	1			0.084 (T)		0.128 (T)
1077	AM_12783	rs4668115	2	169884648	ABCB11_c.-10013G>A	0.25	A // G	A // B	0.25	0.75	NaN	N	snp	99.9	1			0.243 (T)		0.221 (T)
1078	AM_12785	rs4148768	2	169887154	ABCB11_c.-12519C>T	0.133	C // T	A // B	0.867	0.133	NaN	N	snp	100	1			0.084 (T)		0.128 (T)
1079	AM_12843	rs3731722	2	201534389	AOX1_83558A>G(H1297R)	0.009	G // A	A // B	0.009	0.991	NaN	N	snp	100	1			0.033 (C )		0.056 (C )
1080	AM_12847	rs7563682	2	201539206	AOX1_T>C(rs7563682)	0.319	C // T	A // B	0.319	0.681	NaN	N	snp	94.1	1			0.425 (C )		0.360 (T)
1081	AM_12848	rs11684227	2	201540533	AOX1_A>G(rs11684227)	0.409	A // G	A // B	0.409	0.591	NaN	N	snp	100	1			0.434 (A)		0.360 (G)
1082	AM_12849	rs11678615	2	201541621	AOX1_C>T(rs11678615)	0.024	C // T	A // B	0.976	0.024	NaN	N	snp	100	1			0.050 (T)		0.022 (T)
1083	AM_12850	rs16834027	2	201541827	AOX1_G>A(rs16834027)	0.058	G // A	A // B	0.942	0.058	NaN	N	snp	72.8	1			0.121 (A)		0.013 (A)
1084	AM_12851	rs16834034	2	201542014	AOX1_T>G(rs16834034)	0.075	T // G	A // B	0.925	0.075	NaN	N	snp	100	1			0.097 (G)		0.011 (G)
1085	AM_12852	rs6729738	2	201543496	AOX1_T>C(rs6729738)	0.478	C // T	A // B	0.522	0.478	NaN	N	snp	100	1			0.451 (C )		0.186 (C )
1086	AM_12853	rs60606072	2	204103767	CYP20A1_-19C>T	0.014	T // C	A // B	0.014	0.986	NaN	N	snp	100	1			0.000 (T)		0.000 (T)
1087	AM_12854	rs13397243	2	204111574	CYP20A1_7789T>G(F73L)	0	G // T	A // B	0	1	NaN	N	snp	100	1			N/D		N/D
1088	AM_12855	rs2043449	2	204116690	CYP20A1_12905T>C(L97S)	0.072	T // C	A // B	0.928	0.072	NaN	N	snp	100	1			0.035 (G)		0.081 (G)
1089	AM_12856	rs17851797	2	204116770	CYP20A1_12985A>G(K124E)	0	A // G	A // B	1	0	NaN	N	snp	100	1			N/D		N/D
1090	AM_12857	rs1048013	2	204154552	CYP20A1_50767C>T(L346F)	0.358	T // C	A // B	0.642	0.358	NaN	N	snp	100	1			0.468 (C )		0.314 (T)
1091	AM_12877	rs72551314	2	219676973	CYP27A1_c.475C>T(Q159X)	0	C // T	A // B	1	0	NaN	N	snp	100	1			N/D		N/D
1092	AM_12878	rs61733615	2	219676988	CYP27A1_c.490C>T(R164W)	0	C // T	A // B	1	0	NaN	N	snp	99.4	1			N/D		N/D
1093	AM_12879	rs59443548	2	219677004	CYP27A1_c.506C>T(A169V)	0.001	C // T	A // B	0.999	0.001	NaN	N	snp	100	1			0.000 (T)		0.000 (T)
1094	AM_12880	rs2229381	2	219677022	CYP27A1_c.524C>T(T175M)	0.007	C // T	A // B	0.993	0.007	NaN	N	snp	100	1			0.004 (T)		0.012 (T)
1095	AM_12881	rs72551315	2	219677319	CYP27A1_c.691C>T(R231X)	0	C // T	A // B	1	0	NaN	N	snp	99.7	1			N/D		N/D
1096	AM_12894	rs5838709	2	219679378	CYP27A1_c.1374delC(P458X)	0	- // C	A // B	0	1	NaN	N	in-del	100	1
1097	AM_12911	rs1126788	2	234526666	UGT1A8_c.313T>A(L105M)	0	A // T	A // B	0	1	NaN	N	snp	100	1			0.000 (A)		0.000 (A)
1098	AM_12912	rs1126790	2	234526668	UGT1A8_c.315G>A(L105L)	0	A // G	A // B	0	1	NaN	N	snp	100	1			0.000 (A)		N/D
1099	AM_12913	rs1126792	2	234526680	UGT1A8_c.327T>A(F109L)	0	A // T	A // B	0	1	NaN	N	snp	100	1			0.000 (A)		N/D
1100	AM_12914	rs1126793	2	234526681	UGT1A8_c.328C>A(L110M)	0	A // C	A // B	0	1	NaN	N	snp	100	1			0.000 (A)		N/D
1101	AM_12915	rs1126798	2	234526705	UGT1A8_c.352A>G(N118D)	0	G // A	A // B	0	1	NaN	N	snp	89.7	1			0.000 (G)		0.000 (G)
1102	AM_12923	rs1126802	2	234526975	UGT1A8_c.622T>C(W208R)	0	C // T	A // B	1	0	NaN	N	snp	100	1			N/D		N/D
1103	AM_12924	rs1126803	2	234526987	UGT1A8_c.634A>G(M212V)	0	A // G	A // B	1	0	NaN	N	snp	99.7	1			N/D		N/D
1104	AM_12925	rs1126804	2	234527001	UGT1A8_c.648A>C(E216D)	0	A // C	A // B	1	0	NaN	N	snp	98.6	1			N/D		N/D
1105	AM_12932	rs17863762	2	234527183	UGT1A8*3_c.830G>A(C277Y)	0.002	A // G	A // B	0.002	0.998	NaN	N	snp	100	1			0.033 (A)		0.012 (A)
1106	AM_12938	rs56935833	2	234545345	UGT1A10*5_c.177G>A(M59I)	0	A // G	A // B	0	1	NaN	N	snp	88.8	1			N/D		N/D
1107	AM_12941	rs45523834	2	234545765	UGT1A10_c.597T>C(D199D)	0	C // T	A // B	0	1	NaN	N	snp	100	1			0.000 (C )		0.000 (C )
1108	AM_12942	rs58704432	2	234545773	UGT1A10*6_c.605C>T(T202I)	0	T // C	A // B	0	1	NaN	N	snp	100	1			0.000 (T)		0.011 (T)
1109	AM_12947	rs3832043	2	234580463	UGT1A9*1b_c.-118insT	0.423	- // T	A // B	0.577	0.423	NaN	N	in-del	98	1			N/D		N/D
1110	AM_12948	rs72551329	2	234580589	UGT1A9_c.9C>G(C3W)	0	C // G	A // B	1	0	NaN	N	snp	100	1			N/D		N/D
1111	AM_12949	rs72551330	2	234580678	UGT1A9*3_c.98T>C(M33T)	0	C // T	A // B	0	1	NaN	N	snp	97.3	1			N/D		N/D
1112	AM_12951	rs66915469	2	234581306	UGT1A9*4_c.726T>G(Y242X)	0	T // G	A // B	1	0	NaN	N	snp	100	1			0.000 (G)		0.011 (G)
1113	AM_12953	rs58597806	2	234581346	UGT1A9*5_c.766G>A(D256N)	0	A // G	A // B	0	1	NaN	N	snp	100	1			N/D		N/D
1114	AM_12955	N/A	2	234581410	UGT1A9_c.830G>A(C277Y)	0.002	A // G	A // B	0.002	0.998	NaN	N	snp	100	1
1115	AM_12956	rs7586110	2	234590527	UGT1A7*12_c.-57T>G(5'UTR)	0.417	T // G	A // B	0.583	0.417	NaN	N	snp	99.9	1			0.386 (G)		0.233 (G)
1116	AM_12961	rs61261057	2	234590926	UGT1A7*5_c.343G>A(G115S)	0	G // A	A // B	1	0	NaN	N	snp	100	1			0.000 (A)		0.000 (A)
1117	AM_12969	rs6759892	2	234601669	UGT1A6_c.19T>G(S7A)	0.454	G // T	A // B	0.454	0.546	NaN	N	snp	99.7	1			0.412 (G)		0.233 (G)
1118	AM_12971	rs1042707	2	234601707	UGT1A6_c.57A>T(A19A)	0	A // T	A // B	1	0	NaN	N	snp	100	1			0.000 (T)		0.000 (T)
1119	AM_12972	rs1042708	2	234601859	UGT1A6_c.209C>A(S70Y)	0	C // A	A // B	1	0	NaN	N	snp	100	1			0.000 (A)		0.012 (A)
1120	AM_12973	rs1105880	2	234601965	UGT1A6_c.315A>G(L105L)	0.368	G // A	A // B	0.368	0.632	NaN	N	snp	100	1			0.336 (C )		0.233 (C )
1121	AM_12974	rs2070959	2	234602191	UGT1A6_c.541A>G(T181A)	0.329	A // G	A // B	0.671	0.329	NaN	N	snp	99.7	1			0.314 (G)		0.233 (G)
1122	AM_12976	rs17863783	2	234602277	UGT1A6_c.627G>T(V209V)	0.038	G // T	A // B	0.962	0.038	NaN	N	snp	99.7	1			0.022 (T)		0.000 (T)
1123	AM_12980	rs72551334	2	234621869	UGT1A5_c.232A>G(T78A)	0	A // G	A // B	1	0	NaN	N	snp	100	1			N/D		N/D
1124	AM_12981	rs17874942	2	234621922	UGT1A5_c.285T>C(G95G)	0	T // C	A // B	1	0	NaN	N	snp	100	1			0.000 (C )		0.000 (C )
1125	AM_12982	rs3755320	2	234622061	UGT1A5_c.424C>A(H142N)	0.161	C // A	A // B	0.839	0.161	NaN	N	snp	82.3	1			0.108 (T)		0.183 (T)
1126	AM_12986	rs72551335	2	234622258	UGT1A5_c.621delC(F207X)	0	- // C	A // B	0	1	NaN	N	in-del	99.4	1			N/D		N/D
1127	AM_12991	rs6755571	2	234627536	UGT1A4*2_c.70C>A(P24T)	0.061	C // A	A // B	0.939	0.061	NaN	N	snp	99	1			0.050 (A)		0.000 (A)
1128	AM_12999	rs68014726	2	234628087	UGT1A4_c.621delC(F207X)	0	- // C	A // B	0	1	NaN	N	in-del	99	1			N/D		N/D
1129	AM_13004	rs28898617	2	234637789	UGT1A3*5_c.17A>G(Q6R)	0.001	G // A	A // B	0.001	0.999	NaN	N	snp	100	1			N/D		0.093 (A)
1130	AM_13005	rs3821242	2	234637803	UGT1A3_c.31T>C(W11R)	0.414	T // C	A // B	0.414	0.586	NaN	N	snp	81	1			0.458 (G)		0.233 (G)
1131	AM_13007	rs6706232	2	234637853	UGT1A3_c.81G>A(E27E)	0.455	A // G	A // B	0.545	0.455	NaN	N	snp	93.5	1			N/D		0.357 (A)
1132	AM_13008	rs45625338	2	234637905	UGT1A3*4_c.133C>T(R45W)	0.001	C // T	A // B	0.999	0.001	NaN	N	snp	100	1			N/D		0.058 (T)
1133	AM_13011	rs7574296	2	234638249	UGT1A3_c.477A>G(A159A)	0.412	G // A	A // B	0.588	0.412	NaN	N	snp	92.8	1			0.417 (G)		0.205 (G)
1134	AM_13012	rs72551338	2	234638301	UGT1A3_c.529delC(P177X)	0	- // C	A // B	0	1	NaN	N	in-del	100	1			N/D		N/D
1135	AM_13017	rs68014726	2	234656479	UGT1A4_c.621delC(F207X)_alternate	0	- // C	A // B	0	1	NaN	N	in-del	99.9	1			N/D		N/D
1136	AM_13018	rs4124874	2	234665659	UGT1A1*60_c.-3279T>G(Promoter)	0.434	G // T	A // B	0.566	0.434	NaN	Y	snp	96	1			0.451 (C )		0.244 (C )
1137	AM_13019	rs10929302	2	234665782	UGT1A1*93_c.-3156G>A(Promoter)	0.293	G // A	A // B	0.707	0.293	NaN	Y	snp	99.6	1			0.267 (A)		0.089 (A)
1138	AM_13020	rs111741722	2	234665983	UGT1A1_c.-2950A>G	0.337	A // G	A // B	0.663	0.337	NaN	N	snp	100	1			N/D		N/D
1139	AM_13021	rs3755319	2	234667582	UGT1A1*112_c.-1353A>C	0.452	A // C	A // B	0.452	0.548	NaN	N	snp	100	1			0.424 (G)		0.233 (G)
1140	AM_13022	rs887829	2	234668570	UGT1A1*80_c.-364C>T	0.336	T // C	A // B	0.336	0.664	NaN	N	snp	100	1			0.314 (A)		0.093 (A)
1141	AM_13024	rs8175347	2	234668881	UGT1A1*28_c.TATA-box(Promoter)	0.271	TATATATATATA // TATATATATATATA	A // B	0.729	0.271	NaN	N	in-del	87.2	1			N/D		N/D
1142	AM_13030	rs4148323	2	234669144	UGT1A1*6_c.211G>A(G71R)	0.004	G // A	A // B	0.996	0.004	NaN	N	snp	100	1			0.000 (A)		0.209 (A)
1143	AM_13031	rs72551340	2	234669155	UGT1A1*45_c.222C>A(Y74X)	0	A // C	A // B	0	1	NaN	N	snp	100	1			N/D		N/D
1144	AM_13032	rs56059937	2	234669180	UGT1A1*62_c.247T>C(F83L)	0	T // C	A // B	1	0	NaN	N	snp	100	1			N/D		N/D
1145	AM_13033	rs72551341	2	234669457	UGT1A1*12_c.524T>A(L175Q)	0	A // T	A // B	0	1	NaN	N	snp	100	1			N/D		N/D
1146	AM_13034	rs72551342	2	234669462	UGT1A1*15_c.529T>C(C177R)	0	C // T	A // B	0	1	NaN	N	snp	99.9	1			N/D		N/D
1147	AM_13035	rs72551343	2	234669558	UGT1A1*8_c.625C>T(R209W)	0	C // T	A // B	1	0	NaN	N	snp	100	1			N/D		N/D
1148	AM_13037	rs35350960	2	234669619	UGT1A1*27_c.686C>A(P229Q)	0.001	A // C	A // B	0.001	0.999	NaN	N	snp	100	1			0.000 (A)		N/D
1149	AM_13038	rs72551344	2	234669631	UGT1A1*43_c.698T>G(L233R)	0	T // G	A // B	1	0	NaN	N	snp	100	1			N/D		N/D
1150	AM_13040	rs72551345	2	234669759	UGT1A1*14_c.826G>C(G276R)	0	G // C	A // B	1	0	NaN	N	snp	100	1			N/D		N/D
1151	AM_13043	rs62625011	2	234675738	UGT1A1*11_c.923G>A(G308E)	0	A // G	A // B	0	1	NaN	N	snp	100	1			N/D		N/D
1152	AM_13044	rs72551348	2	234675807	UGT1A1*9_c.992A>G(Q331R)	0	G // A	A // B	0	1	NaN	N	snp	100	1			N/D		N/D
1153	AM_13045	rs72551349	2	234676519	UGT1A1*10_c.1021C>T(R341X)	0	C // T	A // B	1	0	NaN	N	snp	100	1			N/D		N/D
1154	AM_13046	rs72551350	2	234676567	UGT1A1*4_c.1069C>T(Q357X)	0	C // T	A // B	1	0	NaN	N	snp	100	1			N/D		N/D
1155	AM_13047	rs72551351	2	234676568	UGT1A1*16_c.1070A>G(Q357R)	0	G // A	A // B	0	1	NaN	N	snp	100	1			N/D		N/D
1156	AM_13049	rs55750087	2	234676880	UGT1A1*29_c.1099C>G(R367G)	0	C // G	A // B	1	0	NaN	N	snp	100	1			N/D		N/D
1157	AM_13050	rs72551352	2	234676883	UGT1A1*20_c.1102G>A(A368T)	0	A // G	A // B	0	1	NaN	N	snp	99.7	1			N/D		N/D
1158	AM_13051	rs72551353	2	234676905	UGT1A1*3_c.1124C>T(S375F)	0	C // T	A // B	1	0	NaN	N	snp	100	1			N/D		N/D
1159	AM_13052	rs72551354	2	234676924	UGT1A1*17_c.1143C>G(S381R)	0	C // G	A // B	1	0	NaN	N	snp	100	1			N/D		N/D
1160	AM_13053	rs72551355	2	234676982	UGT1A1*18_c.1201G>C(A401P)	0	G // C	A // B	1	0	NaN	N	snp	100	1			N/D		N/D
1161	AM_13057	rs72551357	2	234680912	UGT1A1*24_c.1309A>T(K437X)	0	T // A	A // B	0	1	NaN	N	snp	100	1			N/D		N/D
1162	AM_13060	rs28900406	2	234681031	UGT1A1_c.1428C>T(P476P)	0	C // T	A // B	1	0	NaN	N	snp	100	1			0.000 (T)		0.000 (T)
1163	AM_13063	rs72551361	2	234681090	UGT1A1*55_c.1487T>A(L496X)	0	A // T	A // B	0	1	NaN	N	snp	99.9	1			N/D		N/D
1164	AM_13064	rs1042709	2	234681134	UGT1A1_c.1531G>C(A511P)	0	G // C	A // B	1	0	NaN	N	snp	100	1			0.000 (C )		0.000 (C )
1165	AM_13067	rs10929303	2	234681416	UGT1A1*76_c.*211C>T(3'UTR)	0.201	C // T	A // B	0.799	0.201	NaN	N	snp	99.1	1			0.208 (T)		0.163 (T)
1166	AM_13068	rs1042640	2	234681544	UGT1A1*78_c.*339C>G(3'UTR)	0.166	C // G	A // B	0.834	0.166	NaN	N	snp	100	1			0.216 (G)		0.156 (G)
1167	AM_13070	rs8330	2	234681645	UGT1A1*79_c.*440C>G(3'UTR)	0.208	C // G	A // B	0.792	0.208	NaN	N	snp	100	1			0.233 (G)		0.156 (G)
1168	AM_13097	rs1801282	3	12393125	PPARG_c.34C>G(P12A)	0.046	C // G	A // B	0.954	0.046	NaN	N	snp	99.9	1			0.097 (G)		0.023 (G)
1169	AM_13120	rs4135352	3	12458208	PPARG_c.825C>T(F275F)	0	C // T	A // B	1	0	NaN	N	snp	100	1			0.000 (T)		0.000 (T)
1170	AM_13137	rs72551364	3	12475399	PPARG_c.1273C>T(R425C)	0	C // T	A // B	1	0	NaN	N	snp	100	1			N/D		N/D
1171	AM_13138	rs3856806	3	12475557	PPARG_c.1431C>T(H477H)	0.074	C // T	A // B	0.926	0.074	NaN	N	snp	98.1	1			0.130 (T)		0.244 (T)
1172	AM_13140	rs1152003	3	12477055	PPARG_c.*1411G>C	0.49	C // G	A // B	0.49	0.51	NaN	N	snp	99.7	1			0.350 (G)		0.477 (G)
1173	AM_13141	rs9833097	3	12478817	PPARG_c.*3173G>A	0.073	A // G	A // B	0.073	0.927	NaN	N	snp	99.9	1			0.093 (A)		0.000 (A)
1174	AM_13144	rs2341968	3	14467432	SLC6A6_c.-17711T>C	0.013	C // T	A // B	0.013	0.987	NaN	N	snp	99.9	1			N/D		N/D
1175	AM_13148	rs2341970	3	14474225	SLC6A6_c.-10918C>T	0.283	C // T	A // B	0.717	0.283	NaN	N	snp	99.9	1			0.219 (T)		0.411 (T)
1176	AM_13149	rs9879642	3	14485170	SLC6A6_c.28C>T(L10L)	0.006	C // T	A // B	0.994	0.006	NaN	N	snp	99.9	1			N/D		N/D
1177	AM_13150	rs1042350	3	14485193	SLC6A6_c.51C>G(I17M)	0	G // C	A // B	0	1	NaN	N	snp	99.7	1			0.000 (G)		0.000 (G)
1178	AM_13151	rs1042351	3	14485194	SLC6A6_c.52C>G(L18V)	0	C // G	A // B	1	0	NaN	N	snp	99.7	1			0.000 (G)		0.000 (G)
1179	AM_13152	N/A	3	14499566	SLC6A6_708G>C(W236C)	0	C // G	A // B	0	1	NaN	N	snp	100	1
1180	AM_13153	rs9036	3	14530721	SLC6A6_c.*4206A>G	0.282	G // A	A // B	0.282	0.718	NaN	N	snp	100	1			0.199 (C )		0.047 (C )
1181	AM_13154	rs9842091	3	38307510	SLC22A13_c.159T>C(A53A)	0.194	C // T	A // B	0.194	0.806	NaN	N	snp	99.9	1			0.040 (C )		0.071 (C )
1182	AM_13160	rs149836	3	38315821	SLC22A13_c.437C>G(A146G)	0	C // G	A // B	1	0	NaN	N	snp	100	1			0.000 (G)		0.000 (G)
1183	AM_13161	rs72551365	3	38316933	SLC22A13_c.879G>A(K293K)	0	A // G	A // B	0	1	NaN	N	snp	99.9	1			N/D		N/D
1184	AM_13162	rs72551366	3	38318499	SLC22A13_c.1443C>G(P481P)	0	C // G	A // B	1	0	NaN	N	snp	99.9	1			N/D		N/D
1185	AM_13163	rs2298419	3	38322626	SLC22A13_c.*3670C>T	0.319	C // T	A // B	0.681	0.319	NaN	N	snp	95.5	1			0.336 (T)		0.128 (T)
1186	AM_13165	rs1444241	3	38324020	SLC22A13_c.*5064C>T	0.019	T // C	A // B	0.019	0.981	NaN	N	snp	100	1			0.004 (A)		0.035 (A)
1187	AM_13166	rs4679028	3	38327292	SLC22A13_c.*8336G>A	0.335	A // G	A // B	0.335	0.665	NaN	N	snp	100	1			0.283 (A)		0.244 (A)
1188	AM_13175	rs171248	3	38363393	SLC22A14_T>C(rs171248)	0.239	T // C	A // B	0.761	0.239	NaN	N	snp	100	1			0.425 (G)		0.384 (G)
1189	AM_13176	rs183574	3	38363837	SLC22A14_A>C(rs183574)	0.223	C // A	A // B	0.223	0.777	NaN	N	snp	100	1			0.392 (G)		0.389 (G)
1190	AM_13177	rs6799737	3	38365550	SLC22A14_5030T>G	0.149	T // G	A // B	0.851	0.149	NaN	N	snp	100	1			0.013 (G)		0.326 (G)
1191	AM_13178	rs6792261	3	38365841	SLC22A14_4739C>T	0.125	C // T	A // B	0.875	0.125	NaN	N	snp	99.9	1			0.008 (T)		0.256 (T)
1192	AM_13179	rs704930	3	38366871	SLC22A14_3709G>T	0.024	G // T	A // B	0.976	0.024	NaN	N	snp	99.9	1			0.000 (T)		0.000 (T)
1193	AM_13180	rs149738	3	38367984	SLC22A14_2596A>G	0.215	G // A	A // B	0.215	0.785	NaN	N	snp	97.4	1			0.392 (C )		0.389 (C )
1194	AM_13182	rs735320	3	42915878	CYP8B1_c.1431G>A(P477P)	0.084	A // G	A // B	0.084	0.916	NaN	N	snp	97.1	1			0.164 (A)		0.012 (A)
1195	AM_13185	rs741817	3	42916511	CYP8B1_c.798G>T(G266G)	0.004	G // T	A // B	0.996	0.004	NaN	N	snp	100	1			0.000 (T)		0.000 (T)
1196	AM_13188	rs7623741	3	42921827	CYP8B1_c.-4519G>A	0.002	G // A	A // B	0.998	0.002	NaN	N	snp	99.6	1			0.000 (T)		0.000 (T)
1197	AM_13189	rs9816821	3	42921915	CYP8B1_c.-4607T>C	0.004	C // T	A // B	0.004	0.996	NaN	N	snp	100	1			0.000 (G)		0.000 (G)
1198	AM_13190	rs9859496	3	42922473	CYP8B1_c.-5165C>T	0.005	T // C	A // B	0.005	0.995	NaN	N	snp	100	1			0.000 (A)		0.000 (A)
1199	AM_13191	rs6771233	3	42922697	CYP8B1_c.-5389A>C	0.426	A // C	A // B	0.426	0.574	NaN	N	snp	99.9	1			0.376 (T)		0.337 (G)
1200	AM_13192	rs6774801	3	42923776	CYP8B1_c.-6468A>C	0.429	C // A	A // B	0.571	0.429	NaN	N	snp	99.9	1			0.381 (T)		0.314 (G)
1201	AM_13207	rs3814055	3	119500035	NR1I2_c.-1335C>T	0.434	C // T	A // B	0.566	0.434	NaN	N	snp	99.4	1			0.336 (T)		0.233 (T)
1202	AM_13235	rs1063955	3	119526131	NR1I2_c.34G>A(A12T)	0	A // G	A // B	0	1	NaN	N	snp	100	1
1203	AM_13237	rs12721613	3	119526176	NR1I2_c.79C>T(P27S)	0.013	T // C	A // B	0.013	0.987	NaN	N	snp	99.9	1			0.000(T)		0.000(T)
1204	AM_13238	rs12721607	3	119526203	NR1I2_c.106G>A(G36R)	0.003	G // A	A // B	0.997	0.003	NaN	N	snp	100	1			0.000(A)		0.000(A)
1205	AM_13240	rs72551371	3	119529002	NR1I2_c.292C>T(R98C)	0	C // T	A // B	1	0	NaN	N	snp	99.6	1
1206	AM_13242	rs12721608	3	119530419	NR1I2_c.365G>A(R122Q)	0	G // A	A // B	1	0	NaN	N	snp	99.1	1
1207	AM_13243	rs72551372	3	119530472	NR1I2_c.418G>A(V140M)	0	A // G	A // B	0	1	NaN	N	snp	98.4	1
1208	AM_13244	rs72551373	3	119530497	NR1I2_c.443G>A(R148Q)	0	G // A	A // B	1	0	NaN	N	snp	100	1
1209	AM_13245	rs72551374	3	119530542	NR1I2_c.488A>G(D163G)	0	A // G	A // B	1	0	NaN	N	snp	100	1
1210	AM_13253	rs6785049	3	119533733	NR1I2_c.795-93G>A	0.419	A // G	A // B	0.581	0.419	NaN	N	snp	99.6	1			0.327 (G)		0.453 (A)
1211	AM_13255	rs4058490	3	119533910	NR1I2_c.879C>T(N293N)	0	C // T	A // B	1	0	NaN	N	snp	100	1
1212	AM_13256	rs2276707	3	119534153	NR1I2_c.938-17C>T	0.216	C // T	A // B	0.784	0.216	NaN	N	snp	100	1			0.093 (T)		0.5
1213	AM_13258	rs35761343	3	119534626	NR1I2_c.1108G>A(A370T)	0.001	A // G	A // B	0.001	0.999	NaN	N	snp	100	1			0.000 (T)		N/D
1214	AM_13259	rs72551375	3	119534659	NR1I2_c.1141C>T(R381W)	0	C // T	A // B	1	0	NaN	N	snp	100	1
1215	AM_13260	rs72551376	3	119535961	NR1I2_c.1207A>G(I403V)	0	A // G	A // B	1	0	NaN	N	snp	100	1
1216	AM_13282	rs1143669	3	121615288	SLC15A2_c.141C>T(A47A)	0	C // T	A // B	1	0	NaN	N	snp	100	1
1217	AM_13283	rs1920305	3	121615317	SLC15A2_c.170G>A(R57H)	0	G // A	A // B	1	0	NaN	N	snp	100	1
1218	AM_13298	rs2293616	3	121641693	SLC15A2_c.852G>A(A284A)	0.4	G // A	A // B	0.6	0.4	NaN	N	snp	99.1	1			0.469 (T)		0.244 (C )
1219	AM_13300	rs2257212	3	121643804	SLC15A2_c.1048C>T(L350F)	0.403	T // C	A // B	0.403	0.597	NaN	N	snp	99.4	1			0.465 (A)		0.244 (G )
1220	AM_13301	rs1143670	3	121646641	SLC15A2_c.1161A>G(A387A)	0.402	A // G	A // B	0.598	0.402	NaN	N	snp	99.7	1			0.465 (G)		0.244 (A )
1221	AM_13306	rs1143671	3	121647286	SLC15A2_c.1225C>T(P409S)	0.407	T // C	A // B	0.407	0.593	NaN	Y	snp	99.9	1			0.465 (T)		0.244 (C )
1222	AM_13307	rs1143672	3	121648168	SLC15A2_c.1526G>A(R509K)	0.403	A // G	A // B	0.403	0.597	NaN	N	snp	99.4	1			0.483 (A)		0.244 (G)
1223	AM_13315	rs1920314	3	121659774	SLC15A2_c.2110A>C(M704L)	0	C // A	A // B	0	1	NaN	N	snp	100	1
1224	AM_13316	rs1920313	3	121659860	SLC15A2_c.*6C>T(3'UTR)	0.017	T // C	A // B	0.017	0.983	NaN	N	snp	100	1			0.000 (A)		0.000 (A)
1225	AM_13318	rs4388019	3	121660000	SLC15A2_c.*146T>G(3'UTR)	0	G // T	A // B	0	1	NaN	N	snp	100	1
1226	AM_13323	rs3856650	3	126247198	CHST13_c.97+3926A>T	0.465	A // T	A // B	0.465	0.535	NaN	N	snp	100	1			0.398 (T)		0.384 (T)
1227	AM_13324	rs4305381	3	126249877	CHST13_c.98-5237A>C	0.23	A // C	A // B	0.77	0.23	NaN	N	snp	92.8	1			0.286 (C )		0.267 (C )
1228	AM_13325	rs6783962	3	126256669	CHST13_c.180+1473T>G	0.44	G // T	A // B	0.44	0.56	NaN	N	snp	100	1			0.358 (G)		0.302 (G)
1229	AM_13326	rs1873397	3	126257872	CHST13_c.180+2676G>C	0.441	C // G	A // B	0.441	0.559	NaN	N	snp	97.8	1			0.398 (G)		0.284 (G)
1230	AM_13333	rs1056522	3	126261345	CHST13_c.950G>A(R317Q)	0.319	G // A	A // B	0.681	0.319	NaN	N	snp	100	1			0.319 (T)		0.279 (T)
1231	AM_13334	rs1054097	3	126262092	CHST13_c.*671G>C	0.04	C // G	A // B	0.04	0.96	NaN	N	snp	100	1			0.033 (C )		N/D
1232	AM_13337	rs3755740	3	142836966	CHST2_-2693G>A	0.362	G // A	A // B	0.638	0.362	NaN	N	snp	98.4	1			0.299 (T)		0.395 (T)
1233	AM_13338	rs3755739	3	142837272	CHST2_-2387G>A	0.414	G // A	A // B	0.586	0.414	NaN	N	snp	99.9	1			0.301 (T)		0.407 (T)
1234	AM_13339	rs4683739	3	142837361	CHST2_-2298T>A	0.34	A // T	A // B	0.34	0.66	NaN	N	snp	100	1			0.233 (A)		0.389 (A)
1235	AM_13342	rs1473870	3	142839313	CHST2_-346G>C	0	C // G	A // B	0	1	NaN	N	snp	100	1
1236	AM_13346	rs6664	3	142841740	CHST2_2082C>T	0.412	C // T	A // B	0.588	0.412	NaN	N	snp	99.9	1			0.327 (T)		0.372 (T)
1237	AM_13364	rs3805114	3	183637722	ABCC5_c.*1366A>C	0.06	A // C	A // B	0.94	0.06	NaN	N	snp	100	1			0.483 (C )		0.105 (C )
1238	AM_13365	rs562	3	183637845	ABCC5_c.*1243G>A	0.497	A // G	A // B	0.503	0.497	NaN	N	snp	100	1			0.483 (T)		0.488 (C )
1239	AM_13370	rs1053387	3	183643407	ABCC5_c.4148C>A(T1383N)	0	A // C	A // B	0	1	NaN	N	snp	100	1
1240	AM_13377	rs3749442	3	183660585	ABCC5_c.3624C>T(L1208L)	0.146	C // T	A // B	0.854	0.146	NaN	N	snp	100	1			0.183 (T)		0.422 (T)
1241	AM_13378	rs1053351	3	183660603	ABCC5_c.3606C>A(Y1202X)	0	A // C	A // B	0	1	NaN	N	snp	100	1
1242	AM_13381	rs72551384	3	183663700	ABCC5_c.3441_3442insC(V1147X)	0	C // CC	A // B	1	0	NaN	N	in-del	100	1
1243	AM_13393	rs939336	3	183685534	ABCC5_c.1782C>T(C594C)	0.452	T // C	A // B	0.452	0.548	NaN	N	snp	99.7	1			0.408 (A)		0.174 (A)
1244	AM_13397	rs1053386	3	183696387	ABCC5_c.1200C>T(S400S)	0.029	C // T	A // B	0.971	0.029	NaN	N	snp	100	1			0.000 (T)		N/D
1245	AM_13400	rs7636910	3	183699516	ABCC5_c.1146A>G(Q382Q)	0.361	G // A	A // B	0.361	0.639	NaN	N	snp	100	1			0.417 (C )		0.395 (C )
1246	AM_13423	rs72551385	4	69403588	UGT2B17_c.1348C>T(H450Y)	0	C // T	A // B	1	0	NaN	N	snp	100	1
1247	AM_13425	rs7436962	4	69415555	UGT2B17_c.1313+840A>G	0.234	G // A	A // B	0.766	0.234	NaN	N	snp	99	1			0.225 (T)		N/D
1248	AM_13427	rs28374627	4	69417570	UGT2B17_c.1065T>C(Y355Y)	0.128	T // C	A // B	0.128	0.872	NaN	N	snp	100	1			0.225 (A)		N/D
1249	AM_13428	rs4860305	4	69420232	UGT2B17_c.1006-2603T>C	0.139	C // T	A // B	0.139	0.861	NaN	N	snp	99.7	1			0.147 (G)		0.011 (G)
1250	AM_13437	rs4148269	4	69512847	UGT2B15_c.1568A>C(K523T)	0.489	A // C	A // B	0.489	0.511	NaN	N	snp	98.3	1			0.323 (A)		0.240 (C )
1251	AM_13439	rs1902023	4	69536084	UGT2B15_c.253G>T(D85Y)	0.375	G // T	A // B	0.625	0.375	NaN	N	snp	99.9	1			N/D		N/D
1252	AM_13441	rs4148271	4	69512637	UGT2B15_c.*185A>T(3'UTR)	0.087	T // A	A // B	0.087	0.913	NaN	N	snp	100	1			N/D		N/D
1253	AM_13442	rs3100	4	69512655	UGT2B15_c.*168C>T(3'UTR)	0.419	T // C	A // B	0.581	0.419	NaN	N	snp	98	1			0.312 (C )		N/D
1254	AM_13443	rs72551389	4	69512692	UGT2B15_c.*131C>G(3'UTR)	0	C // G	A // B	1	0	NaN	N	snp	100	1
1255	AM_13444	rs4148269	4	69512847	UGT2B15_c.1568A>C(K523T)	0.499	A // C	A // B	0.501	0.499	NaN	N	snp	98.9	1			0.323 (A)		N/D
1256	AM_13445	rs72551390	4	69512917	UGT2B15_c.1498G>A(A500T)	0	A // G	A // B	0	1	NaN	N	snp	100	1
1257	AM_13458	rs7662029	4	69961912	UGT2B7*2_c.-327G>A(Promoter)	0.482	A // G	A // B	0.482	0.518	NaN	N	snp	98	1			0.496 (A)		0.279 (A)
1258	AM_13459	rs7668258	4	69962078	UGT2B7*2_c.-161C>T(Promoter)	0.486	C // T	A // B	0.514	0.486	NaN	N	snp	100	1			0.496 (T)		0.291 (T)
1259	AM_13460	rs12233719	4	69962449	UGT2B7*3_c.211G>T(A71S)	0.001	G // T	A // B	0.999	0.001	NaN	N	snp	100	1			0.000 (T)		0.125 (T)
1260	AM_13463	rs28365062	4	69964271	UGT2B7_c.735A>G(T245T)	0.149	A // G	A // B	0.851	0.149	NaN	N	snp	99.4	1			0.142 (G)		N/D
1261	AM_13464	rs7438284	4	69964337	UGT2B7*2_c.801T>A(P267P)	0.483	T // A	A // B	0.517	0.483	NaN	N	snp	98.9	1			0.492 (A)		N/D
1262	AM_13465	rs7439366	4	69964338	UGT2B7*2_c.802C>T(H268Y)	0.483	C // T	A // B	0.517	0.483	NaN	N	snp	99	1			0.5		0.278 (T)
1263	AM_13468	rs4348159	4	69972952	UGT2B7_c.1062C>T(Y354Y)	0	C // T	A // B	1	0	NaN	N	snp	99.7	1
1264	AM_13471	rs72551394	4	70066319	UGT2B11_c.1429C>A(R477R)	0.09	A // C	A // B	0.09	0.91	NaN	N	snp	99.9	1			N/D		N/D
1265	AM_13472	rs72551395	4	70070366	UGT2B11_c.T>A(G364G)	0.015	A // T	A // B	0.015	0.985	NaN	N	snp	98.1	1			N/D		N/D
1266	AM_13473	rs72551396	4	70070367	UGT2B11_c.G>A(G364D)	0.016	A // G	A // B	0.016	0.984	NaN	N	snp	95.7	1			N/D		N/D
1267	AM_13475	rs3890590	4	70078295	UGT2B11_c.866C>T(P289L)	0	T // C	A // B	0	1	NaN	N	snp	99.9	1
1268	AM_13478	rs7697037	4	70079975	UGT2B11_c.466T>C(C156R)	0.138	C // T	A // B	0.138	0.862	NaN	N	snp	100	1			0.177 (G)		N/D
1269	AM_13496	rs41292949	4	70160259	UGT2B28_c.1322A>G(N441S)	0	A // G	A // B	1	0	NaN	N	snp	100	1
1270	AM_13498	rs41292951	4	70160299	UGT2B28_c.1362G>A(V454V)	0	G // A	A // B	1	0	NaN	N	snp	100	1
1271	AM_13499	rs6828191	4	70160309	UGT2B28_c.1372C>G(H458D)	0	C // G	A // B	0	1	NaN	N	snp	100	1
1272	AM_13507	rs1131878	4	70345904	UGT2B4_c.*448A>G	0.376	A // G	A // B	0.624	0.376	NaN	N	snp	99.4	1			0.336 (G)		0.105 (G)
1273	AM_13508	rs1051752	4	70346057	UGT2B4_c.*295A>C	0.006	A // C	A // B	0.994	0.006	NaN	N	snp	100	1			0.009 (C )		0.000 (C )
1274	AM_13509	rs1966151	4	70346127	UGT2B4_c.*225T>C	0.165	T // C	A // B	0.835	0.165	NaN	N	snp	100	1			0.212 (G)		0.360 (G)
1275	AM_13511	rs13142440	4	70346564	UGT2B4_c.1375C>A(R459R)	0.187	A // C	A // B	0.187	0.813	NaN	N	snp	98.3	1			0.283 (T)		N/D
1276	AM_13513	rs13119049	4	70346565	UGT2B4_c.1374T>A(D458E)	0.188	A // T	A // B	0.188	0.812	NaN	N	snp	99.7	1			0.283 (T)		0.000 (T)
1277	AM_13517	rs72552707	4	70351050	UGT2B4_c.1186T>C(F396L)	0	T // C	A // B	1	0	NaN	N	snp	99.7	1
1278	AM_13518	rs1845555	4	70355211	UGT2B4_c.948G>A(T316T)	0	A // G	A // B	0	1	NaN	N	snp	100	1
1279	AM_13530	rs4148311	4	70454991	UGT2A1_c.*99G>A	0.001	A // G	A // B	0.001	0.999	NaN	N	snp	100	1			N/D		N/D
1280	AM_13531	rs4148310	4	70455150	UGT2A1_c.1524A>G(Q508Q)	0	A // G	A // B	1	0	NaN	N	snp	100	1			N/D		N/D
1281	AM_13534	rs2288741	4	70455478	UGT2A1_c.1305-109A>C	0.259	A // C	A // B	0.741	0.259	NaN	N	snp	100	1			0.168 (C )		0.163 (C )
1282	AM_13535	rs4148304	4	70460328	UGT2A1_c.1171G>A(V391I)	0.051	A // G	A // B	0.051	0.949	NaN	N	snp	99.6	1			0.000 (A)		0.000 (A)
1283	AM_13536	rs4148301	4	70462042	UGT2A1_c.922G>A(G308R)	0.109	A // G	A // B	0.109	0.891	NaN	N	snp	81.6	1			0.133 (A)		0.023 (A)
1284	AM_13558	rs11249454	4	70499234	UGT2A1_c.715+13414A>G	0.178	A // G	A // B	0.822	0.178	NaN	N	snp	100	1			0.147 (C )		0.337 (C )
1285	AM_13572	rs1347046	4	70513139	UGT2A1_c.224G>A(R75K)	0	A // G	A // B	1	0	NaN	N	snp	100	1
1286	AM_13591	rs4149416	4	70596385	SULT1B1_c.612A>C(E204D)	0	A // C	A // B	1	0	NaN	N	snp	100	1
1287	AM_13600	rs11731028	4	70602840	SULT1B1_c.376-2858G>A	0.43	G // A	A // B	0.57	0.43	NaN	N	snp	100	1			0.323 (T)		0.302 (T)
1288	AM_13602	rs11249460	4	70606026	SULT1B1_c.376-6044C>T	0.313	C // T	A // B	0.688	0.313	NaN	N	snp	97.7	1			0.245 (A)		N/D
1289	AM_13603	rs1604741	4	70611119	SULT1B1_c.375+4320T>C	0.397	C // T	A // B	0.603	0.397	NaN	N	snp	98.9	1			0.478 (C )		0.302 (C )
1290	AM_13604	rs57806190	4	70615488	SULT1B1_c.326A>G(H109R)	0	A // G	A // B	1	0	NaN	N	snp	100	1
1291	AM_13605	rs11569731	4	70621074	SULT1B1_c.-44-95T>C	0.04	C // T	A // B	0.04	0.96	NaN	N	snp	100	1			0.058 (C )		0.035 (C )
1292	AM_13632	rs3822172	4	70723840	SULT1E1_c.-9-469A>G	0.131	A // G	A // B	0.869	0.131	NaN	N	snp	100	1			0.147 (G)		0.386 (G)
1293	AM_13633	rs4149528	4	70724053	SULT1E1_c.-9-682A>G	0.004	A // G	A // B	0.996	0.004	NaN	N	snp	100	1			0.000 (G)		0.022 (G)
1294	AM_13634	rs3775770	4	70724270	SULT1E1_c.-9-899G>A	0.239	A // G	A // B	0.239	0.761	NaN	N	snp	100	1			0.270 (A)		0.221 (A)
1295	AM_13635	rs1881668	4	70725456	SULT1E1_c.-10+311G>C	0.306	C // G	A // B	0.306	0.694	NaN	N	snp	100	1			0.317 (C )		0.389 (C )
1296	AM_13637	rs3736599	4	70725821	SULT1E1_c.-64G>A	0.071	G // A	A // B	0.929	0.071	NaN	N	snp	100	1			0.141 (A)		0.226 (A)
1297	AM_13643	rs66878317	4	71859622	DCK_c.70A>G(I24V)	0.001	A // G	A // B	0.999	0.001	NaN	Y	snp	100	1			N/D		N/D
1298	AM_13644	rs66472932	4	71888232	DCK_c.356C>G(A119G)	0	C // G	A // B	1	0	NaN	N	snp	100	1
1299	AM_13645	rs67437265	4	71888240	DCK_c.364C>T(P122S)	0.006	T // C	A // B	0.006	0.994	NaN	N	snp	100	1			0.033 (T)		N/D
1300	AM_13646	rs4643786	4	71895260	DCK_c.*165C>T(3'UTR)	0.141	T // C	A // B	0.859	0.141	NaN	N	snp	100	1			0.050 (C )		0.023 (C )
1301	AM_13647	rs3756067	4	74269645	ALB_c.-400G>A	0.298	A // G	A // B	0.298	0.702	NaN	N	snp	100	1			0.400 (T)		N/D
1302	AM_13664	rs72552711	4	74279326	ALB_c.1033G>A(E345K)	0	G // A	A // B	1	0	NaN	N	snp	100	1
1303	AM_13665	rs17854155	4	74280857	ALB_c.1164A>G(A388A)	0	G // A	A // B	0	1	NaN	N	snp	100	1
1304	AM_13666	rs11538214	4	74281998	ALB_c.1217A>T(E406V)	0	T // A	A // B	0	1	NaN	N	snp	100	1
1305	AM_13667	rs1140449	4	74283381	ALB_c.1423G>T(D475Y)	0	G // T	A // B	1	0	NaN	N	snp	100	1
1306	AM_13668	rs1063469	4	74283844	ALB_c.1468A>G(K490E)	0	A // G	A // B	1	0	NaN	N	snp	100	1
1307	AM_13669	rs11538231	4	74283858	ALB_c.1482T>C(S494S)	0	C // T	A // B	0	1	NaN	N	snp	100	1
1308	AM_13681	rs3201997	4	89034649	ABCG2_c.1000G>T(E334X)	0	G // T	A // B	1	0	NaN	N	snp	100	1
1309	AM_13682	rs3116448	4	89039360	ABCG2_c.742T>C(S248P)	0	C // T	A // B	0	1	NaN	N	snp	100	1
1310	AM_13683	rs1061018	4	89042853	ABCG2_c.623T>C(F208S)	0	C // T	A // B	0	1	NaN	N	snp	100	1
1311	AM_13686	rs3116439	4	89042912	ABCG2_c.564A>G(G188G)	0	A // G	A // B	1	0	NaN	N	snp	100	1
1312	AM_13687	rs1061017	4	89052248	ABCG2_c.496C>G(Q166E)	0	C // G	A // B	1	0	NaN	N	snp	100	1
1313	AM_13688	rs2231142	4	89052323	ABCG2_c.421C>A(Q141K)	0.026	C // A	A // B	0.974	0.026	NaN	N	snp	99.9	1			0.117 (A)		0.289 (A)
1314	AM_13689	rs72552713	4	89052957	ABCG2_c.376C>T(Q126X)	0	T // C	A // B	0	1	NaN	N	snp	94.1	1
1315	AM_13690	rs2231139	4	89052964	ABCG2_c.369C>T(Y123Y)	0.002	C // T	A // B	0.998	0.002	NaN	N	snp	99.9	1			0.000 (T )		0.000 (T )
1316	AM_13706	rs1050637	4	99997530	ADH5_c.738T>A(F246L)	0	A // T	A // B	0	1	NaN	N	snp	100	1
1317	AM_13717	rs1154400	4	100010010	ADH5_c.-159A>G	0.325	G // A	A // B	0.325	0.675	NaN	N	snp	100	1			0.319 (C )		0.000 (C )
1318	AM_13718	rs17216887	4	100010273	ADH5_c.-422G>C	0.013	G // C	A // B	0.987	0.013	NaN	N	snp	100	1			0.058 (G)		0.000 (G)
1319	AM_13719	rs7687322	4	100014342	ADH5_C>T(rs7687322)	0.07	T // C	A // B	0.07	0.93	NaN	N	snp	100	1			0.040 (A)		0.000 (A)
1320	AM_13720	rs2602836	4	100014805	ADH5_C>T(rs2602836)	0.432	T // C	A // B	0.432	0.568	NaN	N	snp	100	1			0.432 (A)		0.256 (A)
1321	AM_13727	rs1126672	4	100047812	ADH4_c.1051C>T(L351L)	0.254	T // C	A // B	0.254	0.746	NaN	N	snp	100	1			0.274 (T)		0.000 (T)
1322	AM_13729	rs1126671	4	100048414	ADH4_c.925G>A(V309I)	0.267	A // G	A // B	0.267	0.733	NaN	N	snp	100	1			0.283 (A)		0.000 (A)
1323	AM_13730	rs1126670	4	100052733	ADH4_c.765T>G(P255P)	0.267	G // T	A // B	0.267	0.733	NaN	N	snp	99.9	1			0.281 (G)		0.000 (G)
1324	AM_13737	rs2032349	4	100062819	ADH4_c.135C>T(S45S)	0.013	C // T	A // B	0.987	0.013	NaN	N	snp	100	1			0.009 (T)		0.011 (T)
1325	AM_13740	rs28987087	4	100065853	ADH4_c.-480G>A	0.001	A // G	A // B	0.001	0.999	NaN	N	snp	100	1			0.000 (A)		N/D
1326	AM_13741	rs3762894	4	100066084	ADH4_c.-711A>G	0.162	G // A	A // B	0.162	0.838	NaN	N	snp	99.9	1			0.133 (C )		0.311 (T)
1327	AM_13747	rs4147546	4	100128682	ADH6_c.885G>A(V295V)	0	A // G	A // B	0	1	NaN	N	snp	100	1
1328	AM_13755	rs6843298	4	100137393	ADH6_c.45C>T(L15L)	0	T // C	A // B	0	1	NaN	N	snp	100	1
1329	AM_13758	rs4699735	4	100140306	ADH6_c.4A>T(S2C)	0	T // A	A // B	0	1	NaN	N	snp	100	1			0.000(A)		0.000(A)
1330	AM_13759	rs10002894	4	100141240	ADH6_c.-930T>C	0.292	C // T	A // B	0.292	0.708	NaN	N	snp	100	1			0.212 (G)		0.035 (G)
1331	AM_13760	rs10008281	4	100142302	ADH6_c.-1992G>T	0.189	T // G	A // B	0.189	0.811	NaN	N	snp	100	1			0.221 (A)		0.209 (C)
1332	AM_13761	rs6830685	4	100143184	ADH6_c.-2874T>C	0.285	T // C	A // B	0.715	0.285	NaN	N	snp	99.7	1			0.212 (G)		0.035 (G)
1333	AM_13763	rs6811453	4	100194977	ADH1A_c.*2804C>T	0.318	T // C	A // B	0.318	0.682	NaN	N	snp	100	1			0.438 (A)		0.000 (A)
1334	AM_13764	rs12512110	4	100195815	ADH1A_c.*1966C>A	0.088	C // A	A // B	0.912	0.088	NaN	N	snp	99.9	1			0.097 (T)		0.128 (T)
1335	AM_13765	rs7684674	4	100197359	ADH1A_c.*422T>G	0.05	T // G	A // B	0.95	0.05	NaN	N	snp	100	1			0.000 (C )		0.000 (C )
1336	AM_13766	rs28364341	4	100197638	ADH1A_c.*143G>C	0	C // G	A // B	0	1	NaN	N	snp	100	1
1337	AM_13768	rs3805324	4	100204574	ADH1A_c.568-811C>T	0	T // C	A // B	0	1	NaN	N	snp	99.9	1
1338	AM_13769	rs6828526	4	100205887	ADH1A_c.333C>T(Y111Y)	0.002	T // C	A // B	0.002	0.998	NaN	N	snp	100	1			0.000 (A)		0.000 (A)
1339	AM_13775	rs1826909	4	100217743	ADH1A_c.-5671G>A	0.299	G // A	A // B	0.701	0.299	NaN	N	snp	100	1			0.428 (T)		0.025 (T)
1340	AM_13790	rs1126441	4	100237125	ADH1B_c.497C>A(P166H)	0	A // C	A // B	0	1	NaN	N	snp	99.9	1
1341	AM_13798	rs6413413	4	100239284	ADH1B_c.178A>T(T60S)	0.026	A // T	A // B	0.974	0.026	NaN	N	snp	99.9	1			0.008 (T)		N/D
1342	AM_13799	rs1041969	4	100239291	ADH1B_c.171C>A(N57K)	0	A // C	A // B	0	1	NaN	N	snp	100	1
1343	AM_13800	rs1229984	4	100239319	ADH1B_c.143G>A(R48H)	0.101	A // G	A // B	0.101	0.899	NaN	N	snp	100	1			0.008 (A)		0.244 (G)
1344	AM_13801	rs1229983	4	100240002	ADH1B_c.60A>G(K20K)	0.027	A // G	A // B	0.973	0.027	NaN	N	snp	100	1			0.034 (C )		0.000 (C )
1345	AM_13802	rs72552716	4	100240012	ADH1B_c.49_50insG(G17X)	0	G // GG	A // B	1	0	NaN	N	in-del	100	1
1346	AM_13810	rs35719513	4	100260783	ADH1C_c.1054C>A(P352T)	0	A // C	A // B	0	1	NaN	N	snp	100	1
1347	AM_13817	rs1789915	4	100266371	ADH1C_c.312T>C(C104C)	0.298	T // C	A // B	0.702	0.298	NaN	N	snp	99.9	1			0.373 (G)		N/D
1348	AM_13818	rs283413	4	100268190	ADH1C_c.232G>T(G78X)	0.032	G // T	A // B	0.968	0.032	NaN	N	snp	99.7	1			0.004 (T)		0.000 (T)
1349	AM_13819	rs35385902	4	100268279	ADH1C_c.143G>A(R48H)	0.003	A // G	A // B	0.003	0.997	NaN	N	snp	100	1			N/D		N/D
1350	AM_13822	rs72552717	4	100273864	ADH1C_c.-32G>A	0	A // G	A // B	0	1	NaN	N	snp	100	1
1351	AM_13841	rs971074	4	100341861	ADH7_c.690G>A(R230R)	0.16	A // G	A // B	0.16	0.84	NaN	N	snp	100	1			0.132 (A)		0.155 (A)
1352	AM_13844	rs1042111	4	100349083	ADH7_c.447C>A(V149V)	0	C // A	A // B	1	0	NaN	N	snp	100	1
1353	AM_13846	rs284797	4	100349135	ADH7_c.395G>A(R132H)	0	A // G	A // B	0	1	NaN	N	snp	100	1
1354	AM_13848	rs1573496	4	100349669	ADH7_c.275G>C(G92A)	0.129	C // G	A // B	0.129	0.871	NaN	N	snp	99.4	1			0.092 (G)		0.000 (G)
1355	AM_13854	rs1442477	4	100361787	ADH7_-5360G>A(rs1442477)	0.034	G // A	A // B	0.966	0.034	NaN	N	snp	100	1			0.000 (A)		0.144 (A)
1356	AM_13859	rs61733374	4	115544609	UGT8_c.573G>T(L191L)	0	G // T	A // B	1	0	NaN	N	snp	100	1
1357	AM_13860	rs4148254	4	115544713	UGT8_c.677C>T(P226L)	0.038	C // T	A // B	0.962	0.038	NaN	N	snp	100	1			0.036 (T)		0.163 (T)
1358	AM_13861	rs6851610	4	115544714	UGT8_c.678G>A(P226P)	0.011	G // A	A // B	0.989	0.011	NaN	N	snp	100	1			0.000 (A)		N/D
1359	AM_13862	rs4148255	4	115544777	UGT8_c.741A>G(A247A)	0.001	A // G	A // B	0.999	0.001	NaN	N	snp	100	1			0.000 (G)		0.070 (G)
1360	AM_13863	rs11098261	4	115589302	UGT8_c.1104G>A(M368I)	0.002	A // G	A // B	0.002	0.998	NaN	N	snp	100	1			0.000 (A)		0.000 (A)
1361	AM_13864	rs17244722	5	74633081	HMGCR_c.-68T>C	0.006	C // T	A // B	0.006	0.994	NaN	N	snp	100	1			N/D		N/D
1362	AM_13867	rs17238351	5	74633716	HMGCR_c.-24+591G>A	0.006	A // G	A // B	0.006	0.994	NaN	N	snp	100	1			N/D		N/D
1363	AM_13869	rs3843482	5	74639259	HMGCR_c.166-419G>T	0	T // G	A // B	0	1	NaN	N	snp	100	1
1364	AM_13870	rs5908	5	74652199	HMGCR_c.1912A>G(I638V)	0.001	A // G	A // B	0.999	0.001	NaN	N	snp	100	1			0.022 (G)		0.011 (G)
1365	AM_13871	rs5909	5	74656175	HMGCR_c.*8G>A	0.07	G // A	A // B	0.93	0.07	NaN	N	snp	100	1			0.125 (A)		0.035 (A)
1366	AM_13872	rs1044453	5	74656274	HMGCR_c.*107G>A	0	A // G	A // B	0	1	NaN	N	snp	100	1
1367	AM_13890	rs460415	5	131649364	SLC22A4_c.555C>T(F185F)	0	C // T	A // B	1	0	NaN	N	snp	100	1
1368	AM_13894	rs272893	5	131663062	SLC22A4_c.917C>T(T306I)	0.437	T // C	A // B	0.437	0.563	NaN	N	snp	100	1			0.376 (A)		0.465 (G)
1369	AM_13896	rs272879	5	131670546	SLC22A4_c.1182C>G(T394T)	0.441	G // C	A // B	0.559	0.441	NaN	N	snp	99.3	1			0.353 (G)		0.453 (C )
1370	AM_13900	rs4646201	5	131671634	SLC22A4_c.1385G>A(G462E)	0	A // G	A // B	0	1	NaN	N	snp	100	1
1371	AM_13903	rs1050152	5	131676320	SLC22A4_c.1507C>T(L503F)	0.076	C // T	A // B	0.924	0.076	NaN	N	snp	99.9	1			0.403 (T)		0.000 (T)
1372	AM_13904	rs72552721	5	131676333	SLC22A4_c.1520delT(F507X)	0	- // T	A // B	0	1	NaN	N	in-del	100	1
1373	AM_13921	rs72552722	5	131705676	SLC22A5_c.12C>G(Y4X)	0	G // C	A // B	0	1	NaN	N	snp	100	1
1374	AM_13929	rs72552727	5	131714072	SLC22A5_c.396G>A(W132X)	0	A // G	A // B	0	1	NaN	N	snp	99.9	1
1375	AM_13931	rs2405518	5	131719906	SLC22A5_c.565T>C(F189L)	0	C // T	A // B	0	1	NaN	N	snp	100	1
1376	AM_13934	rs274558	5	131721174	SLC22A5_c.807A>G(L269L)	0.446	G // A	A // B	0.446	0.554	NaN	N	snp	100	1			0.385 (C )		0.440 (T )
1377	AM_13941	rs1045019	5	131724639	SLC22A5_c.978G>A(Q326Q)	0	A // G	A // B	0	1	NaN	N	snp	100	1
1378	AM_13944	rs72552731	5	131726490	SLC22A5_c.1161T>G(Y387X)	0	T // G	A // B	1	0	NaN	N	snp	100	1
1379	AM_13958	rs1045020	5	131730011	SLC22A5_c.*47C>T	0.126	C // T	A // B	0.874	0.126	NaN	N	snp	99.3	1			0.124 (T)		0.012 (T)
1380	AM_13959	rs274548	5	131730807	SLC22A5_c.*842C>T	0.466	T // C	A // B	0.466	0.534	NaN	N	snp	100	1			0.181 (A)		0.151 (A)
1381	AM_13960	rs6193	5	142659266	NR3C1_c.*2188A>G	0.009	A // G	A // B	0.991	0.009	NaN	N	snp	100	1			0.000 (G)		N/D
1382	AM_13961	rs6187	5	142659748	NR3C1_c.*1706G>T	0	G // T	A // B	1	0	NaN	N	snp	100	1
1383	AM_13962	rs6197	5	142660229	NR3C1_c.*1225T>C	0	T // C	A // B	1	0	NaN	N	snp	100	1
1384	AM_13963	rs6196	5	142661490	NR3C1_c.2298T>C(N766N)	0.029	T // C	A // B	0.971	0.029	NaN	N	snp	100	1			0.137 (G)		0.093 (G)
1385	AM_13964	rs258751	5	142662280	NR3C1_c.2034C>T(D678D)	0.024	C // T	A // B	0.976	0.024	NaN	N	snp	99.7	1			0.000 (T)		N/D
1386	AM_13965	rs6194	5	142678361	NR3C1_c.1764C>T(H588H)	0	T // C	A // B	0	1	NaN	N	snp	99.9	1
1387	AM_13966	rs33391	5	142680246	NR3C1_c.1551C>G(N517K)	0	G // C	A // B	0	1	NaN	N	snp	100	1
1388	AM_13967	rs56149945	5	142779317	NR3C1_c.1088A>G(N363S)	0.002	A // G	A // B	0.998	0.002	NaN	N	snp	100	1			0.016 (G)		N/D
1389	AM_13968	rs6199	5	142779601	NR3C1_c.804C>T(P268P)	0	C // T	A // B	1	0	NaN	N	snp	99.9	1
1390	AM_13969	rs6192	5	142780212	NR3C1_c.193T>G(F65V)	0.004	G // T	A // B	0.004	0.996	NaN	N	snp	100	1			0.000 (G)		N/D
1391	AM_13970	rs6190	5	142780337	NR3C1_c.68G>A(R23K)	0.009	A // G	A // B	0.009	0.991	NaN	N	snp	100	1			0.049 (A)		0.012 (A)
1392	AM_13971	rs6189	5	142780339	NR3C1_c.66G>A(E22E)	0.009	A // G	A // B	0.009	0.991	NaN	N	snp	98.7	1			0.042 (A)		N/D
1393	AM_13973	rs1142345	6	18130918	TPMT*3C_c.719A>G(Y240C)	0.008	A // G	A // B	0.992	0.008	NaN	Y	snp	99.6	1			0.027 (G)		0.012 (G)
1394	AM_13976	rs56161402	6	18130993	TPMT*8_c.644G>A(R215H)	0.001	G // A	A // B	0.999	0.001	NaN	Y	snp	100	1			0.000 (T)		N/D
1395	AM_13977	rs1800584	6	18131012	TPMT*4_c.626-1G>A(SpliceDefect)	0	A // G	A // B	0	1	NaN	Y	snp	100	1
1396	AM_13978	rs6921269	6	18134078	TPMT*24_c.537G>T(Q179H)	0.001	T // G	A // B	0.001	0.999	NaN	N	snp	100	1			0.000 (A)		0.000 (A)
1397	AM_13979	rs2842934	6	18139214	TPMT_c.474C>T(I158I)	0.271	C // T	A // B	0.271	0.729	NaN	Y	snp	98.9	1			0.195 (G)		0.244 (G)
1398	AM_13980	rs1800460	6	18139228	TPMT*3B_c.460G>A(A154T)	0.001	A // G	A // B	0.001	0.999	NaN	Y	snp	100	1			0.026 (A)		N/D
1399	AM_13985	rs72552739	6	18143901	TPMT_c.292G>T(E98X)	0	T // G	A // B	0	1	NaN	N	snp	100	1
1400	AM_13986	rs1800462	6	18143955	TPMT*2_c.238G>C(A80P)	0	G // C	A // B	1	0	NaN	N	snp	100	1
1401	AM_14021	rs72552756	6	32008469	CYP21A2_G>C(E351D)	0	G // C	A // B	1	0	NaN	N	snp	100	1
1402	AM_14022	rs72552757	6	32008648	CYP21A2_C>T(R379C)	0	C // T	A // B	1	0	NaN	N	snp	100	1
1403	AM_14023	rs72552758	6	32008696	CYP21A2_G>A(G395S)	0	G // A	A // B	1	0	NaN	N	snp	100	1
1404	AM_14098	rs6919734	6	35311988	PPARD_c.-186+1530G>A	0.045	A // G	A // B	0.045	0.955	NaN	N	snp	99.9	1			0.013 (A)		0.000 (A)
1405	AM_14099	rs2267664	6	35312254	PPARD_c.-186+1796G>A	0.064	A // G	A // B	0.064	0.936	NaN	N	snp	100	1			0.025 (A)		0.232 (A)
1406	AM_14101	rs6457813	6	35317301	PPARD_c.-102+2374C>T	0.08	C // T	A // B	0.92	0.08	NaN	N	snp	100	1			0.043 (T)		0.044 (T)
1407	AM_14103	rs4713851	6	35318784	PPARD_c.-102+3857G>A	0	A // G	A // B	0	1	NaN	N	snp	100	1
1408	AM_14104	rs7771474	6	35320447	PPARD_c.-102+5520C>T	0.05	C // T	A // B	0.95	0.05	NaN	N	snp	99.9	1			0.013 (T)		N/D
1409	AM_14106	rs7744392	6	35322763	PPARD_c.-102+7836A>G	0.1	A // G	A // B	0.9	0.1	NaN	N	snp	100	1			0.049 (G)		0.012 (G)
1410	AM_14107	rs7758272	6	35322975	PPARD_c.-102+8048A>G	0.1	A // G	A // B	0.9	0.1	NaN	N	snp	100	1			0.049 (G)		0.012 (G)
1411	AM_14108	rs7746988	6	35324741	PPARD_c.-102+9814T>C	0.082	C // T	A // B	0.082	0.918	NaN	N	snp	100	1			0.018 (C )		0.035 (C )
1412	AM_14109	rs4278009	6	35325718	PPARD_c.-102+10791C>T	0	C // T	A // B	1	0	NaN	N	snp	100	1
1413	AM_14111	rs6901410	6	35330030	PPARD_c.-102+15103T>C	0.212	C // T	A // B	0.212	0.788	NaN	N	snp	95.4	1			0.080 (C )		0.058 (C )
1414	AM_14112	rs6457815	6	35330898	PPARD_c.-102+15971T>C	0.131	C // T	A // B	0.131	0.869	NaN	N	snp	99.3	1			0.049 (C )		0.012 (C )
1415	AM_14113	rs7757196	6	35335290	PPARD_c.-102+20363G>A	0.018	A // G	A // B	0.018	0.982	NaN	N	snp	100	1			0.000 (A)		0.000 (A)
1416	AM_14114	rs7754530	6	35337958	PPARD_c.-102+23031T>G	0.023	T // G	A // B	0.977	0.023	NaN	N	snp	99.9	1			0.000 (G)		0.000 (G)
1417	AM_14115	rs7772754	6	35338106	PPARD_c.-102+23179C>G	0	C // G	A // B	1	0	NaN	N	snp	100	1
1418	AM_14116	rs7739752	6	35339035	PPARD_c.-102+24108C>T	0.215	T // C	A // B	0.215	0.785	NaN	N	snp	100	1			0.080 (T)		0.058 (T)
1419	AM_14117	rs6913026	6	35340894	PPARD_c.-102+25967C>G	0.023	C // G	A // B	0.977	0.023	NaN	N	snp	99.1	1			0.000 (G)		0.000 (G)
1420	AM_14118	rs7770619	6	35350042	PPARD_c.-101-28722C>T	0.083	C // T	A // B	0.917	0.083	NaN	N	snp	99.9	1			0.049 (T)		0.012 (T)
1421	AM_14119	rs6937483	6	35350759	PPARD_c.-101-28005G>A	0.022	A // G	A // B	0.022	0.978	NaN	N	snp	99.7	1			0.000 (A)		0.000 (A)
1422	AM_14120	rs6922548	6	35353523	PPARD_c.-101-25241A>G	0.214	G // A	A // B	0.214	0.786	NaN	N	snp	100	1			0.080 (G)		0.058 (G)
1423	AM_14122	rs6940722	6	35356161	PPARD_c.-101-22603G>C	0.022	C // G	A // B	0.022	0.978	NaN	N	snp	99.7	1			N/D		N/D
1424	AM_14123	rs3798343	6	35357693	PPARD_c.-101-21071C>G	0.094	C // G	A // B	0.906	0.094	NaN	N	snp	99.9	1			0.027 (G)		0.233 (G)
1425	AM_14124	rs6915115	6	35358945	PPARD_c.-101-19819C>T	0.047	C // T	A // B	0.953	0.047	NaN	N	snp	100	1			0.004 (T)		0.012 (T)
1426	AM_14125	rs2299867	6	35359874	PPARD_c.-101-18890G>A	0	G // A	A // B	1	0	NaN	N	snp	100	1
1427	AM_14126	rs7769719	6	35362525	PPARD_c.-101-16239G>A	0.139	A // G	A // B	0.139	0.861	NaN	N	snp	99.1	1			0.081 (A)		N/D
1428	AM_14127	rs6457816	6	35362848	PPARD_c.-101-15916T>C	0.226	C // T	A // B	0.226	0.774	NaN	N	snp	100	1			0.084 (C )		0.058 (C )
1429	AM_14128	rs4632889	6	35363730	PPARD_c.-101-15034G>A	0	A // G	A // B	0	1	NaN	N	snp	100	1
1430	AM_14129	rs1883323	6	35365346	PPARD_c.-101-13418A>G	0.001	A // G	A // B	0.999	0.001	NaN	N	snp	100	1			0.031 (C )		N/D
1431	AM_14130	rs2284197	6	35365457	PPARD_c.-101-13307A>G	0.021	A // G	A // B	0.979	0.021	NaN	N	snp	100	1			0.018 (G)		0.050 (G)
1432	AM_14131	rs2267665	6	35369491	PPARD_c.-101-9273G>A	0.238	A // G	A // B	0.238	0.762	NaN	N	snp	99.4	1			0.181 (A)		0.198 (A)
1433	AM_14132	rs1883322	6	35369806	PPARD_c.-101-8958T>C	0.451	T // C	A // B	0.549	0.451	NaN	N	snp	98.7	1			0.265 (G)		0.256 (G)
1434	AM_14133	rs1883321	6	35369834	PPARD_c.-101-8930C>T	0.008	T // C	A // B	0.008	0.992	NaN	N	snp	100	1			0.000 (A)		0.000 (A)
1435	AM_14134	rs7751481	6	35371753	PPARD_c.-101-7011G>A	0.466	G // A	A // B	0.534	0.466	NaN	N	snp	100	1			0.265 (A)		0.256 (A)
1436	AM_14135	rs2267667	6	35372524	PPARD_c.-101-6240C>G	0.465	G // C	A // B	0.465	0.535	NaN	N	snp	99.7	1			0.265 (G)		0.256 (G)
1437	AM_14136	rs2038067	6	35374466	PPARD_c.-101-4298A>G	0.24	G // A	A // B	0.24	0.76	NaN	N	snp	100	1			0.176 (C )		0.198 (C )
1438	AM_14137	rs6906237	6	35375526	PPARD_c.-101-3238C>A	0.184	A // C	A // B	0.184	0.816	NaN	N	snp	99.9	1			0.066 (A)		0.047 (A)
1439	AM_14138	rs6911817	6	35376287	PPARD_c.-101-2477C>T	0.074	C // T	A // B	0.926	0.074	NaN	N	snp	100	1			0.013 (T)		0.000 (T)
1440	AM_14139	rs4388282	6	35376350	PPARD_c.-101-2414A>C	0	A // C	A // B	1	0	NaN	N	snp	100	1
1441	AM_14140	rs4555908	6	35376403	PPARD_c.-101-2361C>A	0	A // C	A // B	0	1	NaN	N	snp	100	1
1442	AM_14141	rs4292520	6	35376414	PPARD_c.-101-2350A>C	0	C // A	A // B	0	1	NaN	N	snp	100	1
1443	AM_14142	rs4323304	6	35376422	PPARD_c.-101-2342A>C	0	A // C	A // B	1	0	NaN	N	snp	100	1
1444	AM_14143	rs4587165	6	35376679	PPARD_c.-101-2085A>C	0	A // C	A // B	1	0	NaN	N	snp	100	1
1445	AM_14144	rs4360132	6	35376713	PPARD_c.-101-2051A>C	0	A // C	A // B	1	0	NaN	N	snp	100	1
1446	AM_14145	rs1003973	6	35377301	PPARD_c.-101-1463A>C	0.254	A // C	A // B	0.746	0.254	NaN	N	snp	99.4	1			0.000 (C )		N/D
1447	AM_14146	rs2267668	6	35377922	PPARD_c.-101-842A>G	0.242	G // A	A // B	0.242	0.758	NaN	N	snp	99.9	1			0.181 (G)		0.174 (G)
1448	AM_14147	rs2267669	6	35378124	PPARD_c.-101-640A>G	0.242	A // G	A // B	0.758	0.242	NaN	N	snp	100	1			0.181 (G)		0.174 (G)
1449	AM_14149	rs2076167	6	35391787	PPARD_c.489T>C(N163N)	0.451	T // C	A // B	0.549	0.451	NaN	N	snp	99.6	1			0.243 (G)		0.233 (G)
1450	AM_14151	rs1053046	6	35395578	PPARD_c.*1722G>A	0.199	A // G	A // B	0.199	0.801	NaN	N	snp	99.9	1			0.068 (A)		0.035 (A)
1451	AM_14154	rs2651185	6	43264787	SLC22A7_c.-1310T>C	0.012	C // T	A // B	0.012	0.988	NaN	N	snp	100	1			0.000 (G)		0.000 (G)
1452	AM_14160	rs36040909	6	43269348	SLC22A7_c.979C>T(R327W)	0	C // T	A // B	1	0	NaN	N	snp	100	1
1453	AM_14161	rs35385682	6	43269386	SLC22A7_c.1017C>A(R339R)	0.002	C // A	A // B	0.998	0.002	NaN	N	snp	100	1			N/D		N/D
1454	AM_14162	rs2651184	6	43270097	SLC22A7_c.1221C>T(A407A)	0.012	C // T	A // B	0.988	0.012	NaN	N	snp	99.9	1			0.000 (A)		0.000 (A)
1455	AM_14163	rs2270860	6	43270151	SLC22A7_c.1275C>T(S425S)	0.456	C // T	A // B	0.544	0.456	NaN	N	snp	99	1			0.275 (A)		0.278 (A)
1456	AM_14164	rs2841646	6	43270326	SLC22A7_c.1277-67G>A	0.022	G // A	A // B	0.978	0.022	NaN	N	snp	100	1			0.000 (T)		0.000 (T)
1457	AM_14166	rs2242416	6	43273604	SLC22A7_c.563A>G(I188T)	0.46	A // G	A // B	0.54	0.46	NaN	N	snp	100	1			0.403 (T)		0.279 (T)
1458	AM_14169	rs8187630	6	44197181	SLC29A1_c.84G>A(P28P)	0	A // G	A // B	0	1	NaN	N	snp	99.6	1
1459	AM_14170	rs8187640	6	44198312	SLC29A1_c.597G>A(S199S)	0.017	G // A	A // B	0.983	0.017	NaN	N	snp	99.7	1			0.000 (A)		N/D
1460	AM_14171	rs45573936	6	44198362	SLC29A1_c.647T>C(I216T)	0.002	T // C	A // B	0.998	0.002	NaN	N	snp	99.9	1			N/D		N/D
1461	AM_14172	rs8187642	6	44198402	SLC29A1_c.687G>A(L229L)	0	G // A	A // B	1	0	NaN	N	snp	98.7	1
1462	AM_14173	rs186556	6	44199202	SLC29A1_c.864+4C>T	0.006	C // T	A // B	0.994	0.006	NaN	N	snp	100	1			0.000 (T)		0.000 (T)
1463	AM_14174	rs8187633	6	44200105	SLC29A1_c.999T>C(C333C)	0	T // C	A // B	1	0	NaN	N	snp	100	1
1464	AM_14176	rs45458701	6	44200655	SLC29A1_c.1171G>A(E391K)	0.003	G // A	A // B	0.997	0.003	NaN	N	snp	100	1			0.000 (A)		N/D
1465	AM_14177	rs8187637	6	44201311	SLC29A1_c.*46C>A	0	C // A	A // B	1	0	NaN	N	snp	100	1
1466	AM_14178	rs14623	6	44201707	SLC29A1_c.*442G>A	0	A // G	A // B	0	1	NaN	N	snp	99.9	1
1467	AM_14196	rs7761731	6	46563817	CYP39A1_c.972T>A(N324K)	0.464	A // T	A // B	0.536	0.464	NaN	N	snp	99.9	1			0.233 (T)		0.214 (T)
1468	AM_14216	rs2277119	6	46609905	CYP39A1_c.308G>A(R103H)	0.299	A // G	A // B	0.299	0.701	NaN	N	snp	100	1			0.221 (A)		0.198 (A)
1469	AM_14223	rs59926524	6	46620271	CYP39A1_c.49C>G(L17V)	0.005	G // C	A // B	0.005	0.995	NaN	N	snp	100	1			0.000 (C )		0.000 (C )
1470	AM_14224	rs66992975	6	46620437	CYP39A1_c.-118C>G	0	C // G	A // B	1	0	NaN	N	snp	100	1
1471	AM_14225	rs9369629	6	46624537	SLC25A27_c.298+766C>G	0.059	G // C	A // B	0.059	0.941	NaN	N	snp	99.9	1			0.000 (C )		0.078 (C )
1472	AM_14226	rs9381468	6	46625274	SLC25A27_c.299-1425C>T	0.498	C // T	A // B	0.502	0.498	NaN	N	snp	96.7	1			0.491 (G)		0.396 (A)
1473	AM_14227	rs953062	6	46626353	SLC25A27_c.299-346T>C	0.397	T // C	A // B	0.603	0.397	NaN	N	snp	100	1			0.314 (G)		0.233 (G)
1474	AM_14231	rs2234952	6	52615226	GSTA2_c.*149T>A	0.001	A // T	A // B	0.001	0.999	NaN	N	snp	100	1			0.000 (A)		0.000 (A)
1475	AM_14233	rs2266632	6	52615353	GSTA2_c.*22G>A	0.003	A // G	A // B	0.003	0.997	NaN	N	snp	100	1			0.000 (A)		0.000 (A)
1476	AM_14234	rs6577	6	52615415	GSTA2_c.629A>C(E210A)	0.231	A // C	A // B	0.769	0.231	NaN	N	snp	99.9	1			0.067 (C )		0.202 (C )
1477	AM_14238	rs13212306	6	52617664	GSTA2_c.402T>C(P134P)	0	C // T	A // B	0	1	NaN	N	snp	100	1
1478	AM_14240	rs2180314	6	52617731	GSTA2_c.335G>C(S112T)	0.438	G // C	A // B	0.562	0.438	NaN	N	snp	100	1			0.430 (C )		0.300 (C )
1479	AM_14241	rs2234951	6	52617738	GSTA2_c.328C>T(P110S)	0.047	T // C	A // B	0.047	0.953	NaN	N	snp	100	1			0.054 (T)		0.119 (T)
1480	AM_14244	rs1803684	6	52622755	GSTA2_c.-10G>C	0.182	C // G	A // B	0.182	0.818	NaN	N	snp	96.8	1			0.5		N/D
1481	AM_14251	rs1051874	6	52657681	GSTA1_c.519T>C(S173S)	0	T // C	A // B	1	0	NaN	N	snp	100	1
1482	AM_14252	rs1051873	6	52657684	GSTA1_c.516C>T(S172S)	0	C // T	A // B	1	0	NaN	N	snp	100	1
1483	AM_14253	rs3209670	6	52657696	GSTA1_c.504G>A(E168E)	0	A // G	A // B	0	1	NaN	N	snp	69	1
1484	AM_14254	rs1051866	6	52657699	GSTA1_c.501C>G(V167V)	0	G // C	A // B	0	1	NaN	N	snp	77.9	1
1485	AM_14258	rs1051777	6	52658955	GSTA1_c.382A>C(I128L)	0	A // C	A // B	1	0	NaN	N	snp	100	1
1486	AM_14261	rs1051757	6	52658988	GSTA1_c.349A>C(K117Q)	0	A // C	A // B	1	0	NaN	N	snp	100	1
1487	AM_14262	rs1051745	6	52658999	GSTA1_c.338C>A(P113Q)	0	A // C	A // B	0	1	NaN	N	snp	99.9	1
1488	AM_14263	rs1051739	6	52659002	GSTA1_c.335G>C(C112S)	0	C // G	A // B	0	1	NaN	N	snp	99.6	1
1489	AM_14270	rs1051573	6	52664031	GSTA1_c.35C>T(A12V)	0	C // T	A // B	1	0	NaN	N	snp	100	1
1490	AM_14271	rs1051566	6	52664032	GSTA1_c.34G>A(A12T)	0	A // G	A // B	0	1	NaN	N	snp	100	1
1491	AM_14286	rs4715332	6	52669185	GSTA1_c.-5120T>G	0.382	T // G	A // B	0.618	0.382	NaN	N	snp	100	1			0.416 (C )		0.105 (C )
1492	AM_14287	rs4715333	6	52669249	GSTA1_c.-5184G>T	0.208	T // G	A // B	0.208	0.792	NaN	N	snp	86.8	1			N/D		N/D
1493	AM_14291	rs61734384	6	52698964	GSTA5_c.389A>G(N130S)	0	A // G	A // B	1	0	NaN	N	snp	100	1
1494	AM_14292	rs4515385	6	52699081	GSTA5_c.273-1G>A	0	G // A	A // B	1	0	NaN	N	snp	100	1
1495	AM_14293	rs2397118	6	52701143	GSTA5_c.163A>G(I55V)	0.063	A // G	A // B	0.938	0.063	NaN	N	snp	100	1			0.059 (C )		0.111 (C )
1496	AM_14296	rs4715354	6	52708797	GSTA5_c.-31+2057C>T	0.351	C // T	A // B	0.649	0.351	NaN	N	snp	100	1			0.491 (G)		0.302 (G)
1497	AM_14297	rs7748890	6	52709117	GSTA5_c.-31+1737C>T	0.209	C // T	A // B	0.791	0.209	NaN	N	snp	100	1			0.067 (A)		0.170 (A)
1498	AM_14298	rs7746993	6	52714137	GSTA5_-8526G>T	0.024	G // T	A // B	0.976	0.024	NaN	N	snp	100	1			0.000 (A)		0.151 (A)
1499	AM_14299	rs7747555	6	52714573	GSTA5_-8962C>T	0.06	T // C	A // B	0.06	0.94	NaN	N	snp	98.9	1			0.060 (A)		0.111 (A)
1500	AM_14303	rs72552760	6	52764744	GSTA3_c.401_402insC(P134X)	0	C // CC	A // B	1	0	NaN	N	in-del	100	1
1501	AM_14306	rs512795	6	52766983	GSTA3_c.272+161A>G	0.193	G // A	A // B	0.193	0.807	NaN	N	snp	97.7	1			0.066 (C )		0.337 (C )
1502	AM_14307	rs2281593	6	52767028	GSTA3_c.272+116C>T	0.015	T // C	A // B	0.015	0.985	NaN	N	snp	100	1			0.000 (A)		0.023 (A)
1503	AM_14309	rs1052661	6	52767205	GSTA3_c.211A>C(I71L)	0.02	A // C	A // B	0.98	0.02	NaN	N	snp	100	1			N/D		0.000 (C )
1504	AM_14310	rs17851798	6	52767227	GSTA3_c.189G>T(M63I)	0	G // T	A // B	1	0	NaN	N	snp	99.7	1
1505	AM_14314	rs59410661	6	52770596	GSTA3_c.37C>T(R13W)	0	T // C	A // B	0	1	NaN	N	snp	100	1
1506	AM_14315	rs9474342	6	52774462	GSTA3_c.-45G>A	0.021	G // A	A // B	0.979	0.021	NaN	N	snp	99.6	1			0.000 (T)		0.000 (T)
1507	AM_14321	rs405729	6	52842781	GSTA4_c.*487G>A	0.428	A // G	A // B	0.428	0.572	NaN	N	snp	99.4	1			0.483 (G)		0.179 (A)
1508	AM_14322	rs7496	6	52842839	GSTA4_c.*429G>A	0.142	A // G	A // B	0.142	0.858	NaN	N	snp	100	1			0.105 (A)		0.116 (A)
1509	AM_14324	rs367836	6	52843131	GSTA4_c.*137A>C	0.396	A // C	A // B	0.604	0.396	NaN	N	snp	100	1			0.438 (C )		0.186 (C )
1510	AM_14328	rs4147617	6	52847431	GSTA4_c.487A>G(T163A)	0	A // G	A // B	1	0	NaN	N	snp	99.7	1
1511	AM_14329	rs1802061	6	52849325	GSTA4_c.351G>A(Q117Q)	0.034	A // G	A // B	0.034	0.966	NaN	N	snp	100	1			0.058 (A)		0.000 (A)
1512	AM_14336	rs13197674	6	52860407	GSTA4_c.-1366A>G	0.317	G // A	A // B	0.317	0.683	NaN	N	snp	98.7	1			0.314 (C )		0.047 (C )
1513	AM_14337	rs6909523	6	52860408	GSTA4_c.-1367A>G	0.085	G // A	A // B	0.085	0.915	NaN	N	snp	97.8	1			0.053 (C )		0.000 (C )
1514	AM_14340	rs1056795	6	111368336	GSTM2P1_C>A(rs1056795)	0	C // A	A // B	1	0	NaN	N	snp	99	1
1515	AM_14342	rs34447885	6	160543008	SLC22A1_c.41C>T(S14F)	0.003	C // T	A // B	0.997	0.003	NaN	Y	snp	99.7	1			0.000 (T)		N/D
1516	AM_14343	rs72552761	6	160543021	SLC22A1_c.54insC	0	- // C	A // B	1	0	NaN	Y	in-del	100	1
1517	AM_14344	rs34570655	6	160543034	SLC22A1_c.67C>G(L23V)	0	C // G	A // B	1	0	NaN	Y	snp	100	1
1518	AM_14345	rs35888596	6	160543080	SLC22A1_c.113G>A(G38D)	0.08	A // G	A // B	0.08	0.92	NaN	Y	snp	99.7	1			N/D		N/D
1519	AM_14347	rs1867351	6	160543123	SLC22A1_c.156T>C(S52S)	0.117	T // C	A // B	0.883	0.117	NaN	Y	snp	99.3	1			0.171 (G)		0.366 (G)
1520	AM_14348	rs12208357	6	160543148	SLC22A1_c.181C>T(R61C)	0.033	C // T	A // B	0.967	0.033	NaN	Y	snp	99.9	1			0.031 (T)		N/D
1521	AM_14349	rs35546288	6	160543220	SLC22A1_c.253C>T(L85F)	0	C // T	A // B	1	0	NaN	Y	snp	99.9	1
1522	AM_14350	rs55918055	6	160543229	SLC22A1_c.262T>C(C88R)	0.002	C // T	A // B	0.002	0.998	NaN	Y	snp	99.6	1			0.008 (C )		N/D
1523	AM_14351	rs683369	6	160551204	SLC22A1_c.480C>G(F160L)	0.063	C // G	A // B	0.937	0.063	NaN	N	snp	99.9	1			0.252 (G)		0.093 (G)
1524	AM_14353	rs34104736	6	160553314	SLC22A1_c.566C>T(S189L)	0	C // T	A // B	1	0	NaN	N	snp	100	1
1525	AM_14354	rs36103319	6	160553407	SLC22A1_c.659G>T(G220V)	0	G // T	A // B	1	0	NaN	N	snp	100	1
1526	AM_14357	rs4646277	6	160557260	SLC22A1_c.848C>T(P283L)	0	C // T	A // B	1	0	NaN	N	snp	100	1
1527	AM_14358	rs4646278	6	160557271	SLC22A1_c.859C>G(R287G)	0	G // C	A // B	0	1	NaN	N	snp	100	1
1528	AM_14359	rs2282143	6	160557643	SLC22A1_c.1022C>T(P341L)	0.01	C // T	A // B	0.99	0.01	NaN	N	snp	100	1			0.000 (T)		0.186 (T)
1529	AM_14361	rs34130495	6	160560824	SLC22A1_c.1201G>A(G401S)	0.004	A // G	A // B	0.004	0.996	NaN	N	snp	100	1			0.017 (A)		N/D
1530	AM_14362	rs35373824	6	160560832	SLC22A1_c.1209C>T(I403I)	0	C // T	A // B	1	0	NaN	N	snp	100	1
1531	AM_14363	rs628031	6	160560845	SLC22A1_c.1222G>A(V408M)	0.269	A // G	A // B	0.269	0.731	NaN	N	snp	99.3	1			0.420 (A)		0.163 (A)
1532	AM_14368	rs72552763	6	160560883	SLC22A1_c.1260_1262delGAT(M420del)	0.149	- // GAT	A // B	0.149	0.851	NaN	N	in-del	99.7	1			N/D		N/D
1533	AM_14371	rs35956182	6	160564616	SLC22A1_c.1320G>A(M440I)	0	G // A	A // B	1	0	NaN	N	snp	100	1
1534	AM_14372	rs34295611	6	160564677	SLC22A1_c.1381G>A(V461I)	0.001	A // G	A // B	0.001	0.999	NaN	N	snp	100	1			N/D		N/D
1535	AM_14373	rs34059508	6	160575837	SLC22A1_c.1393G>A(G465R)	0.002	G // A	A // B	0.998	0.002	NaN	N	snp	100	1			0.016 (A)		N/D
1536	AM_14374	rs35270274	6	160575907	SLC22A1_c.1463G>T(R488M)	0.006	T // G	A // B	0.006	0.994	NaN	N	snp	100	1			N/D		N/D
1537	AM_14376	rs16891138	6	160579596	SLC22A1_c.1647A>C(S549S)	0.008	A // C	A // B	0.992	0.008	NaN	N	snp	100	1			0.000 (C )		0.000 (C )
1538	AM_14377	rs9457846	6	160579629	SLC22A1_c.*15G>A(3'UTR)	0	G // A	A // B	1	0	NaN	N	snp	98.6	1
1539	AM_14379	rs34108432	6	160579637	SLC22A1_c.*23G>A(3'UTR)	0	C // T	A // B	1	0	NaN	N	snp	100	1
1540	AM_14385	rs8177521	6	160645751	SLC22A2_c.1587C>T(A529A)	0	C // T	A // B	1	0	NaN	N	snp	100	1
1541	AM_14386	rs316003	6	160645832	SLC22A2_c.1506A>G(V502V)	0.198	A // G	A // B	0.802	0.198	NaN	N	snp	100	1			0.226 (C )		0.186 (C )
1542	AM_14388	rs8177520	6	160662609	SLC22A2_c.1398C>T(G466G)	0	C // T	A // B	1	0	NaN	N	snp	100	1
1543	AM_14389	rs3907239	6	160663326	SLC22A2_c.1388G>A(R463K)	0	A // G	A // B	0	1	NaN	N	snp	98.6	1
1544	AM_14390	rs8177517	6	160663420	SLC22A2_c.1294A>C(K432Q)	0.006	A // C	A // B	0.994	0.006	NaN	N	snp	99.6	1			0.000 (C )		0.000 (C )
1545	AM_14391	rs8177515	6	160664680	SLC22A2_c.1203C>T(I401I)	0.001	C // T	A // B	0.999	0.001	NaN	N	snp	100	1			0.004 (T)		0.000 (T)
1546	AM_14392	rs8177516	6	160664685	SLC22A2*7_c.1198C>T(R400C)	0.003	C // T	A // B	0.997	0.003	NaN	N	snp	100	1			0.013 (T)		0.012 (T)
1547	AM_14394	rs8177513	6	160668283	SLC22A2_c.890C>G(A297G)	0	C // G	A // B	1	0	NaN	N	snp	100	1
1548	AM_14395	rs316019	6	160670282	SLC22A2_c.808G>T(A270S)	0.126	G // T	A // B	0.874	0.126	NaN	N	snp	100	1			0.097 (T)		0.128 (T)
1549	AM_14396	rs8177510	6	160671584	SLC22A2*8_c.669C>T(I223I)	0	C // T	A // B	1	0	NaN	N	snp	100	1
1550	AM_14398	rs8177507	6	160677669	SLC22A2_c.495G>A(M165I)	0	G // A	A // B	1	0	NaN	N	snp	100	1
1551	AM_14399	rs8177508	6	160677671	SLC22A2_c.493A>G(M165V)	0	A // G	A // B	1	0	NaN	N	snp	100	1
1552	AM_14400	rs8177509	6	160677683	SLC22A2*5_c.481T>C(F161L)	0	C // T	A // B	0	1	NaN	N	snp	100	1
1553	AM_14401	rs624249	6	160679400	SLC22A2_c.390G>T(T130T)	0.47	T // G	A // B	0.47	0.53	NaN	N	snp	99.7	1			0.398 (A)		0.233 (A)
1554	AM_14402	rs8177504	6	160679630	SLC22A2_c.160C>T(P54S)	0	C // T	A // B	1	0	NaN	Y	snp	99.9	1
1555	AM_14403	rs72552765	6	160679656	SLC22A2_c.134insA	0	T // TA	A // B	1	0	NaN	Y	in-del	99.7	1
1556	AM_14430	rs3918291	6	160828142	SLC22A3_c.603T>C(F201F)	0.001	C // T	A // B	0.001	0.999	NaN	N	snp	100	1			0.031 (C )		0.000 (C )
1557	AM_14443	rs8187725	6	160858154	SLC22A3_c.1199C>T(T400I)	0	T // C	A // B	0	1	NaN	N	snp	100	1
1558	AM_14444	rs2292334	6	160858188	SLC22A3_c.1233G>A(A411A)	0.195	G // A	A // B	0.805	0.195	NaN	N	snp	100	1			0.357 (T)		0.407 (T)
1559	AM_14449	rs8187722	6	160864758	SLC22A3_c.1494A>G(L498L)	0.013	A // G	A // B	0.987	0.013	NaN	N	snp	99.9	1			0.000 (G)		N/D
1560	AM_14464	rs10249788	7	17338147	AHR_c.-742C>T	0.111	C // T	A // B	0.889	0.111	NaN	N	snp	99.3	1			0.158 (T)		N/D
1561	AM_14465	rs10253202	7	17338425	AHR_c.-464G>A	0.006	A // G	A // B	0.006	0.994	NaN	N	snp	99	1			0.000 (A)		N/D
1562	AM_14467	rs12112861	7	17339078	AHR_c.65+125C>A	0.004	A // C	A // B	0.004	0.996	NaN	N	snp	99.9	1			N/D		N/D
1563	AM_14471	rs2066853	7	17379110	AHR_c.1661G>A(R554K)	0.205	A // G	A // B	0.205	0.795	NaN	N	snp	100	1			0.097 (A)		0.360 (A)
1564	AM_14475	rs1803080	7	17385198	AHR_c.*2109C>T	0	C // T	A // B	1	0	NaN	N	snp	100	1
1565	AM_14476	rs1803079	7	17385270	AHR_c.*2181C>T	0	C // T	A // B	1	0	NaN	N	snp	100	1
1566	AM_14490	rs6965343	7	75592925	POR_c.189-8806C>T	0.376	C // T	A // B	0.624	0.376	NaN	N	snp	100	1			0.279 (T)		0.488 (T)
1567	AM_14518	rs17685	7	75616105	POR_c.*306G>A	0.28	G // A	A // B	0.72	0.28	NaN	N	snp	100	1			0.279 (T)		0.279 (T)
1568	AM_14519	rs2286824	7	75616171	POR_c.*372G>A	0	A // G	A // B	0	1	NaN	N	snp	100	1
1569	AM_14524	rs3827653	7	86990746	CROT_c.281G>A(R94H)	0	G // A	A // B	1	0	NaN	N	snp	96.8	1
1570	AM_14525	rs7785206	7	87021023	CROT_c.1420G>C(V474L)	0.073	C // G	A // B	0.073	0.927	NaN	N	snp	100	1			0.075 (C )		0.011 (C )
1571	AM_14526	rs31651	7	87029287	CROT_c.*1327G>A	0.063	A // G	A // B	0.063	0.937	NaN	N	snp	100	1			0.115 (A)		0.302 (A)
1572	AM_14527	rs31652	7	87029687	CROT_c.*1727A>G	0.07	A // G	A // B	0.93	0.07	NaN	N	snp	100	1			0.146 (G)		0.326 (G)
1573	AM_14528	rs2097937	7	87030903	ABCB4_c.*509T>C	0.133	C // T	A // B	0.133	0.867	NaN	N	snp	99.9	1			0.199 (G)		0.337 (G)
1574	AM_14529	rs8187811	7	87032531	ABCB4_c.3553A>G(I1185V)	0	A // G	A // B	1	0	NaN	N	snp	100	1
1575	AM_14530	rs31655	7	87035792	ABCB4_c.3298G>A(A1100T)	0	A // G	A // B	0	1	NaN	N	snp	100	1
1576	AM_14531	rs8187807	7	87037488	ABCB4_c.3144C>T(N1048N)	0	C // T	A // B	1	0	NaN	N	snp	100	1
1577	AM_14532	rs8187808	7	87037521	ABCB4_c.3111T>C(N1037N)	0.001	C // T	A // B	0.001	0.999	NaN	N	snp	100	1			N/D		N/D
1578	AM_14533	rs45574932	7	87038681	ABCB4_c.2952A>G(A984A)	0.001	G // A	A // B	0.001	0.999	NaN	N	snp	100	1			0.000 (G)		N/D
1579	AM_14535	rs3761810	7	87046751	ABCB4_c.2559T>G(G853G)	0	G // T	A // B	0	1	NaN	N	snp	100	1
1580	AM_14536	rs8187801	7	87049345	ABCB4_c.2363G>A(R788Q)	0.008	G // A	A // B	0.992	0.008	NaN	N	snp	100	1			0.000 (T)		0.012 (T)
1581	AM_14537	rs8187802	7	87049383	ABCB4_c.2325G>C(T775T)	0.004	C // G	A // B	0.004	0.996	NaN	N	snp	93	1			0.000 (G)		N/D
1582	AM_14539	rs72552774	7	87056157	ABCB4_c.1973G>A(W658X)	0	G // A	A // B	1	0	NaN	N	snp	100	1
1583	AM_14540	rs2230028	7	87056176	ABCB4_c.1954A>G(R652G)	0.077	G // A	A // B	0.077	0.923	NaN	N	snp	100	1			0.080 (G)		0.023 (G)
1584	AM_14542	rs72552775	7	87056224	ABCB4_c.1906C>T(Q636X)	0	C // T	A // B	1	0	NaN	N	snp	100	1
1585	AM_14546	rs8187797	7	87069130	ABCB4_c.1584G>C(E528D)	0.004	C // G	A // B	0.004	0.996	NaN	N	snp	100	1			0.000 (G)		0.000 (G)
1586	AM_14552	rs45596335	7	87079405	ABCB4_c.712C>G(L238V)	0	C // G	A // B	1	0	NaN	N	snp	100	1
1587	AM_14553	rs2109505	7	87079406	ABCB4_c.711A>T(I237I)	0.255	A // T	A // B	0.745	0.255	NaN	N	snp	100	1			0.155 (A)		0.222 (A)
1588	AM_14554	rs8187791	7	87080951	ABCB4_c.696C>T(A232A)	0	C // T	A // B	1	0	NaN	N	snp	100	1
1589	AM_14556	rs1202283	7	87082292	ABCB4_c.504C>T(N168N)	0.401	T // C	A // B	0.401	0.599	NaN	N	snp	99.9	1			0.394 (G)		0.360 (A)
1590	AM_14558	rs72552780	7	87082366	ABCB4_c.430C>T(R144X)	0	C // T	A // B	1	0	NaN	N	snp	99.9	1
1591	AM_14560	rs8187787	7	87092120	ABCB4_c.240G>A(E80E)	0	A // G	A // B	0	1	NaN	N	snp	100	1
1592	AM_14561	rs8187788	7	87092143	ABCB4_c.217C>G(L73V)	0	C // G	A // B	1	0	NaN	N	snp	100	1
1593	AM_14562	rs2302387	7	87092185	ABCB4_c.175C>T(L59L)	0.25	T // C	A // B	0.25	0.75	NaN	N	snp	99.9	1			0.143 (A)		0.155 (A)
1594	AM_14563	rs8187789	7	87092213	ABCB4_c.147C>T(S49S)	0.004	C // T	A // B	0.996	0.004	NaN	N	snp	100	1			0.000 (T)		0.000 (T)
1595	AM_14567	rs4148808	7	87105795	ABCB4_c.-1014A>G	0.233	G // A	A // B	0.233	0.767	NaN	N	snp	100	1			0.177 (G)		N/D
1596	AM_14568	rs4148807	7	87105812	ABCB4_c.-1031C>T	0.323	C // T	A // B	0.677	0.323	NaN	N	snp	74	1			0.142 (T)		0.244 (T)
1597	AM_14569	rs4148806	7	87106265	ABCB4_c.-1484T>C	0.002	C // T	A // B	0.002	0.998	NaN	N	snp	100	1			0.000 (C )		N/D
1598	AM_14570	rs4148805	7	87106365	ABCB4_c.-1584C>T	0.233	C // T	A // B	0.767	0.233	NaN	N	snp	100	1			0.108 (T)		N/D
1599	AM_14572	rs3747806	7	87106702	ABCB4_c.-1921T>C	0.03	C // T	A // B	0.03	0.97	NaN	N	snp	100	1			0.040 (C )		0.000 (C )
1600	AM_14575	rs3842	7	87133366	ABCB1_c.*193A>G(3'UTR)	0.22	A // G	A // B	0.78	0.22	NaN	N	snp	100	1			0.142 (G)		0.244 (G)
1601	AM_14577	rs17064	7	87133470	ABCB1_c.*89A>T(3'UTR)	0.16	A // T	A // B	0.84	0.16	NaN	N	snp	100	1			0.050 (T)		0.000 (T)
1602	AM_14578	rs28364274	7	87133651	ABCB1_c.3751G>A(V1251I)	0	A // G	A // B	0	1	NaN	N	snp	100	1
1603	AM_14579	rs2235051	7	87133655	ABCB1_c.3747C>G(G1249G)	0	C // G	A // B	1	0	NaN	N	snp	99.7	1
1604	AM_14581	rs1045642	7	87138645	ABCB1_c.3435C>T(I1145I)	0.361	C // T	A // B	0.639	0.361	NaN	N	snp	99.4	1			0.429 (C )		0.417 (T)
1605	AM_14582	rs2229107	7	87138659	ABCB1_c.3421T>A(S1141T)	0.001	T // A	A // B	0.999	0.001	NaN	N	snp	100	1			0.000 (A)		0.000 (A)
1606	AM_14587	rs2707943	7	87144640	ABCB1_c.3189C>G(G1063G)	0	G // C	A // B	0	1	NaN	N	snp	100	1
1607	AM_14588	rs2707944	7	87144641	ABCB1_c.3188G>C(G1063A)	0	G // C	A // B	1	0	NaN	N	snp	100	1
1608	AM_14589	rs28401798	7	87144678	ABCB1_c.3151C>G(P1051A)	0	C // G	A // B	1	0	NaN	N	snp	100	1
1609	AM_14590	rs2235044	7	87145825	ABCB1_c.3084G>A(P1028P)	0	G // A	A // B	1	0	NaN	N	snp	100	1
1610	AM_14591	rs72552784	7	87145914	ABCB1_c.2995G>A(A999T)	0	G // A	A // B	1	0	NaN	N	snp	100	1
1611	AM_14593	rs9282563	7	87160645	ABCB1_c.2650C>T(L884L)	0	T // C	A // B	0	1	NaN	N	snp	100	1
1612	AM_14594	rs28381967	7	87160789	ABCB1_c.2506A>G(I836V)	0	A // G	A // B	1	0	NaN	N	snp	100	1
1613	AM_14595	rs28381966	7	87160790	ABCB1_c.2505A>G(V835V)	0	G // A	A // B	0	1	NaN	N	snp	100	1
1614	AM_14596	rs2032581	7	87160810	ABCB1_c.2485A>G(I829V)	0	A // G	A // B	1	0	NaN	N	snp	100	1
1615	AM_14598	rs2235040	7	87165750	ABCB1_c.2481+24G>A	0.108	A // G	A // B	0.108	0.892	NaN	N	snp	100	1			0.146 (A)		0.035 (A)
1616	AM_14599	rs2235039	7	87165854	ABCB1_c.2401G>A(V801M)	0	A // G	A // B	0	1	NaN	N	snp	100	1
1617	AM_14602	rs2235036	7	87175271	ABCB1_c.1795G>A(A599T)	0	A // G	A // B	0	1	NaN	N	snp	100	1
1618	AM_14603	rs28381915	7	87175272	ABCB1_c.1794C>T(I598I)	0	C // T	A // B	1	0	NaN	N	snp	85.6	1
1619	AM_14604	rs28381914	7	87175289	ABCB1_c.1777C>T(R593C)	0	C // T	A // B	1	0	NaN	N	snp	100	1
1620	AM_14605	rs2235013	7	87178626	ABCB1_c.1725+38A>G	0.494	A // G	A // B	0.494	0.506	NaN	N	snp	100	1			0.442 (A)		0.302 (A)
1621	AM_14606	rs28381902	7	87178693	ABCB1_c.1696G>A(E566K)	0	G // A	A // B	1	0	NaN	N	snp	100	1
1622	AM_14607	rs2235012	7	87178727	ABCB1_c.1662G>C(L554L)	0.003	G // C	A // B	0.997	0.003	NaN	N	snp	100	1			0.000 (C )		0.000 (C )
1623	AM_14609	rs2235033	7	87179143	ABCB1_c.1554+24C>T	0.487	C // T	A // B	0.487	0.513	NaN	N	snp	98.3	1			0.438 (C )		0.302 (C )
1624	AM_14610	rs2032588	7	87179443	ABCB1_c.1350+44C>T	0.12	C // T	A // B	0.88	0.12	NaN	N	snp	100	1			0.093 (T)		0.000 (T)
1625	AM_14612	rs1128503	7	87179601	ABCB1_c.1236C>T(G412G)	0.369	T // C	A // B	0.369	0.631	NaN	N	snp	97.8	1			0.451 (T)		0.291 (C )
1626	AM_14616	rs2229109	7	87179809	ABCB1_c.1199G>A(S400N)	0.028	A // G	A // B	0.028	0.972	NaN	N	snp	100	1			0.027 (A)		0.000 (A)
1627	AM_14617	rs10276036	7	87180198	ABCB1_c.IVS9-44A>G	0.374	G // A	A // B	0.374	0.626	NaN	N	snp	99.4	1			0.451 (C )		0.291 (T)
1628	AM_14619	rs28381867	7	87190668	ABCB1_c.738G>A(A246A)	0	A // G	A // B	0	1	NaN	N	snp	100	1
1629	AM_14620	rs2235022	7	87190677	ABCB1_c.729A>G(E243E)	0	A // G	A // B	1	0	NaN	N	snp	100	1
1630	AM_14621	rs1128502	7	87195533	ABCB1_c.555A>T(G185G)	0	T // A	A // B	0	1	NaN	N	snp	100	1
1631	AM_14622	rs1128501	7	87195534	ABCB1_c.554G>T(G185V)	0	G // T	A // B	1	0	NaN	N	snp	100	1
1632	AM_14624	rs2235015	7	87199564	ABCB1_c.287-25G>T	0.223	G // T	A // B	0.777	0.223	NaN	N	snp	100	1			0.243 (T)		0.023 (T)
1633	AM_14625	rs9282565	7	87214875	ABCB1_c.239C>A(A80E)	0	C // A	A // B	1	0	NaN	N	snp	100	1
1634	AM_14627	rs1202183	7	87214983	ABCB1_c.131A>G(N44S)	0	A // G	A // B	1	0	NaN	N	snp	100	1
1635	AM_14628	rs9282564	7	87229440	ABCB1_c.61A>G(N21D)	0.005	G // A	A // B	0.005	0.995	NaN	N	snp	100	1			0.100 (G)		0.000 (G)
1636	AM_14630	rs28381804	7	87229452	ABCB1_c.49T>C(F17L)	0	C // T	A // B	0	1	NaN	N	snp	100	1
1637	AM_14631	rs2214102	7	87229501	ABCB1_c.-1G>A	0.018	A // G	A // B	0.018	0.982	NaN	N	snp	100	1			0.088 (A)		0.000 (A)
1638	AM_14633	rs3213619	7	87230193	ABCB1_c.-129T>C	0.075	T // C	A // B	0.925	0.075	NaN	N	snp	100	1			0.031 (C )		0.081 (C )
1639	AM_14661	rs7785971	7	91736794	AKAP9_c.11546+58T>A	0.493	A // T	A // B	0.507	0.493	NaN	N	snp	99.1	1			0.405 (A)		0.211 (A)
1640	AM_14662	rs2049900	7	91738788	AKAP9_c.11687-648C>G	0.086	C // G	A // B	0.914	0.086	NaN	N	snp	100	1			0.103 (G)		0.337 (G)
1641	AM_14666	rs7793861	7	91742728	CYP51A1_c.*251G>C	0.48	G // C	A // B	0.48	0.52	NaN	N	snp	79.7	1			0.425 (G)		N/D
1642	AM_14667	rs7797834	7	91743150	CYP51A1_c.1359T>C(H453H)	0.491	T // C	A // B	0.509	0.491	NaN	N	snp	99.7	1			0.389 (G)		0.198 (G)
1643	AM_14668	rs7798757	7	91743685	CYP51A1_c.1352-528T>A	0.009	T // A	A // B	0.991	0.009	NaN	N	snp	99.3	1			0.000 (T)		0.022 (T)
1644	AM_14669	rs59683852	7	91746400	CYP51A1_c.1309C>T(P437S)	0.001	C // T	A // B	0.999	0.001	NaN	N	snp	100	1			N/D		N/D
1645	AM_14670	rs61735065	7	91753050	CYP51A1_c.888C>T(Y296Y)	0	T // C	A // B	0	1	NaN	N	snp	100	1
1646	AM_14671	rs72552785	7	91756859	CYP51A1_c.555A>C(T185T)	0	C // A	A // B	0	1	NaN	N	snp	99.9	1
1647	AM_14672	rs2229188	7	91763623	CYP51A1_c.56T>C(V19A)	0	C // T	A // B	0	1	NaN	N	snp	99.9	1
1648	AM_14673	rs17166761	7	94925304	PPP1R9A_c.*5689C>G	0.004	G // C	A // B	0.004	0.996	NaN	N	snp	100	1			0.000 (G )		0.000 (G )
1649	AM_14675	rs3917594	7	94937439	PON1_c.582G>A(W194X)	0	A // G	A // B	0	1	NaN	N	snp	97.6	1
1650	AM_14681	rs854560	7	94946084	PON1_c.163T>A(L55M)	0.422	T // A	A // B	0.578	0.422	NaN	N	snp	99.7	1			0.375 (T)		0.033 (T)
1651	AM_14695	rs3917464	7	94954745	PON1_G>C(rs3917464)	0.014	C // G	A // B	0.014	0.986	NaN	N	snp	100	1			0.000 (C )		0.000 (C )
1652	AM_14696	rs17880470	7	94993261	PON3_c.609T>C(Y203Y)	0.022	C // T	A // B	0.022	0.978	NaN	N	snp	100	1			0.009 (C )		N/D
1653	AM_14702	rs13226149	7	95025600	PON3_c.63C>T(F21F)	0.239	T // C	A // B	0.239	0.761	NaN	N	snp	100	1			0.208 (A)		0.233 (A)
1654	AM_14704	rs2072200	7	95026160	PON3_c.-498C>G	0.149	G // C	A // B	0.149	0.851	NaN	N	snp	100	1			0.272 (C )		0.378 (G)
1655	AM_14705	rs11764079	7	95026229	PON3_c.-567G>A	0.241	G // A	A // B	0.759	0.241	NaN	N	snp	100	1			0.208 (T)		0.209 (T)
1656	AM_14706	rs11770903	7	95026327	PON3_c.-665T>C	0.241	T // C	A // B	0.759	0.241	NaN	N	snp	100	1			0.205 (G)		0.209 (G)
1657	AM_14707	rs17882539	7	95026408	PON3_c.-746C>T	0.235	C // T	A // B	0.765	0.235	NaN	N	snp	99.7	1			0.208 (T)		N/D
1658	AM_14708	rs17885453	7	95026456	PON3_c.-794C>T	0.036	C // T	A // B	0.964	0.036	NaN	N	snp	100	1			0.023 (T)		N/D
1659	AM_14710	rs17876174	7	95034036	PON2_c.*606T>G	0.022	G // T	A // B	0.022	0.978	NaN	N	snp	100	1			N/D		N/D
1660	AM_14718	rs13306701	7	95041718	PON2_c.273A>G(K91K)	0	A // G	A // B	1	0	NaN	N	snp	100	1
1661	AM_14719	rs13306699	7	95053880	PON2_c.92C>T(S31F)	0	C // T	A // B	1	0	NaN	N	snp	100	1
1662	AM_14723	rs13242987	7	95064821	PON2_c.-558G>C	0	G // C	A // B	1	0	NaN	N	snp	100	1
1663	AM_14726	rs28365085	7	99245974	CYP3A5*3F_31551T>C(I488T)	0	T // C	A // B	1	0	NaN	N	snp	100	1
1664	AM_14730	rs41279854	7	99247772	CYP3A5*3K_29753T>C(F446S)	0	T // C	A // B	1	0	NaN	N	snp	100	1
1665	AM_14735	rs28365083	7	99250236	CYP3A5*2_27289C>A(T398N)	0	A // C	A // B	0	1	NaN	N	snp	100	1
1666	AM_14737	rs41303343	7	99250393	CYP3A5*7_27131insT	0.006	T // TT	A // B	0.994	0.006	NaN	N	in-del	100	1			N/D		N/D
1667	AM_14739	rs28383479	7	99258139	CYP3A5*9_19386G>A(A337T)	0	A // G	A // B	0	1	NaN	N	snp	100	1
1668	AM_14748	rs10264272	7	99262835	CYP3A5*6_14690G>A(SpliceDefect)	0.026	G // A	A // B	0.974	0.026	NaN	N	snp	100	1			0.000 (T)		0.012 (T)
1669	AM_14749	rs56411402	7	99262860	CYP3A5*4_14665A>G(Q200R)	0	G // A	A // B	0	1	NaN	N	snp	100	1
1670	AM_14753	rs55965422	7	99264573	CYP3A5*5_12952T>C(SpliceDefect)	0	T // C	A // B	1	0	NaN	N	snp	100	1
1671	AM_14756	rs41279857	7	99270222	CYP3A5_7303C>A(S100Y)	0	C // A	A // B	1	0	NaN	N	snp	98.7	1
1672	AM_14757	rs56244447	7	99270276	CYP3A5*3D_7249T>G(L82R)	0	T // G	A // B	1	0	NaN	N	snp	99.6	1
1673	AM_14759	rs776746	7	99270539	CYP3A5*3_6986A>G(SpliceDefect)	0.116	A // G	A // B	0.116	0.884	NaN	N	snp	99.3	1			0.036 (A)		0.337 (A)
1674	AM_14762	rs72552791	7	99273745	CYP3A5*3L_3775A>G(Y53C)	0	A // G	A // B	1	0	NaN	N	snp	100	1
1675	AM_14764	rs28383468	7	99273815	CYP3A5*3B_3705C>T(H30Y)	0	C // T	A // B	1	0	NaN	N	snp	100	1
1676	AM_14765	rs55817950	7	99273821	CYP3A5*8_3699C>T(R28C)	0	C // T	A // B	1	0	NaN	N	snp	100	1
1677	AM_14781	rs2257401	7	99306685	CYP3A7*2_26041C>G(T409R)	0.156	G // C	A // B	0.156	0.844	NaN	N	snp	98.7	1			0.067 (C )		0.344 (C )
1678	AM_14789	rs28451617	7	99332765	CYP3A7*1E_-49G>A(Promoter)	0.022	G // A	A // B	0.978	0.022	NaN	N	snp	97	1			N/D		N/D
1679	AM_14790	rs55798860	7	99332807	CYP3A7*1D_-91G>A(Promoter)	0.036	A // G	A // B	0.036	0.964	NaN	N	snp	100	1			N/D		N/D
1680	AM_14791	rs45446698	7	99332948	CYP3A7*1C_-232A>C(Promoter)	0.021	C // A	A // B	0.021	0.979	NaN	N	snp	100	1			0.048 (C )		N/D
1681	AM_14794	rs45467892	7	99332997	CYP3A7*1C_-281A>T(Promoter)	0.016	A // T	A // B	0.984	0.016	NaN	N	snp	99.3	1			N/D		N/D
1682	AM_14796	rs45494802	7	99333000	CYP3A7*1C_-284T>A(Promoter)	0.013	A // T	A // B	0.013	0.987	NaN	N	snp	96.4	1			N/D		N/D
1683	AM_14798	rs45465393	7	99333030	CYP3A7*1B_-314C>T(Promoter)	0	C // T	A // B	1	0	NaN	N	snp	100	1
1684	AM_14802	rs67666821	7	99355806	CYP3A4*20_25889insA	0	- // A	A // B	1	0	NaN	Y	in-del	100	1
1685	AM_14804	rs4986913	7	99358459	CYP3A4*19_23237C>T(P467S)	0	T // C	A // B	0	1	NaN	N	snp	100	1
1686	AM_14805	rs72552795	7	99358465	CYP3A4_23231insC	0	- // C	A // B	1	0	NaN	N	in-del	100	1
1687	AM_14807	rs4986910	7	99358524	CYP3A4*3_23171T>C(M445T)	0	C // T	A // B	0	1	NaN	N	snp	100	1
1688	AM_14808	rs1041988	7	99358566	CYP3A4_23130T>C(I431T)	0	C // T	A // B	0	1	NaN	N	snp	100	1
1689	AM_14809	rs4986909	7	99359670	CYP3A4*13_22026C>T(P416L)	0	C // T	A // B	1	0	NaN	N	snp	100	1
1690	AM_14811	rs12721629	7	99359800	CYP3A4*12_21896C>T(L373F)	0	T // C	A // B	0	1	NaN	N	snp	100	1
1691	AM_14812	rs67784355	7	99359829	CYP3A4*11_21867C>T(T363M)	0	T // C	A // B	0	1	NaN	N	snp	100	1
1692	AM_14814	rs2242480	7	99361466	CYP3A4_20230G>A	0.219	A // G	A // B	0.219	0.781	NaN	N	snp	100	1			0.073 (T)		0.280 (T)
1693	AM_14815	rs28371759	7	99361626	CYP3A4*18_20070T>C(L293P)	0	C // T	A // B	0	1	NaN	N	snp	100	1
1694	AM_14816	rs4646438	7	99364034	CYP3A4*6_17661insA	0	- // A	A // B	1	0	NaN	N	in-del	100	1
1695	AM_14817	rs3208363	7	99364798	CYP3A4_16898T>G(S252A)	0	G // T	A // B	0	1	NaN	N	snp	100	1
1696	AM_14820	rs55785340	7	99365983	CYP3A4*2_15713T>C(S222P)	0	C // T	A // B	0	1	NaN	N	snp	100	1
1697	AM_14821	rs55901263	7	99365994	CYP3A4*5_15702C>G(P218R)	0	C // G	A // B	1	0	NaN	N	snp	100	1
1698	AM_14823	rs3208361	7	99366070	CYP3A4_15626A>G(I193V)	0	A // G	A // B	1	0	NaN	N	snp	100	1
1699	AM_14824	rs4987161	7	99366081	CYP3A4*17_15615T>C(F189S)	0	C // T	A // B	0	1	NaN	N	snp	100	1
1700	AM_14825	rs12721627	7	99366093	CYP3A4*16_15603C>G(T185S)	0	C // G	A // B	1	0	NaN	N	snp	100	1
1701	AM_14828	rs4986907	7	99367427	CYP3A4*15_14269G>A(R162Q)	0.001	G // A	A // B	0.999	0.001	NaN	N	snp	100	1			0.000 (A)		0.000 (A)
1702	AM_14830	rs72552799	7	99367788	CYP3A4*8_13908G>A(R130Q)	0	G // A	A // B	1	0	NaN	N	snp	100	1
1703	AM_14831	rs55951658	7	99367825	CYP3A4*4_13871A>G(I118V)	0	G // A	A // B	0	1	NaN	N	snp	100	1
1704	AM_14832	rs3091339	7	99370245	CYP3A4_11451A>G(K96E)	0	A // G	A // B	1	0	NaN	N	snp	100	1
1705	AM_14834	rs56324128	7	99375702	CYP3A4*7_6004G>A(G56D)	0	A // G	A // B	0	1	NaN	N	snp	100	1
1706	AM_14835	rs12721634	7	99381661	CYP3A4*14_44T>C(L15P)	0	C // T	A // B	0	1	NaN	N	snp	100	1
1707	AM_14846	rs2740574	7	99382096	CYP3A4_-392A>G	0.098	A // G	A // B	0.902	0.098	NaN	N	snp	100	1			0.023 (G)		N/D
1708	AM_14856	rs533486	7	99440694	CYP3A43_14956C>T	0.263	T // C	A // B	0.738	0.263	NaN	N	snp	97.7	1			0.434 (G)		0.291 (G)
1709	AM_14857	rs4646474	7	99445132	CYP3A43_19394C>T(L114L)	0	T // C	A // B	0	1	NaN	N	snp	100	1
1710	AM_14858	rs45450092	7	99445791	CYP3A43_20053G>T(M145I)	0	G // T	A // B	1	0	NaN	N	snp	100	1
1711	AM_14859	rs800667	7	99447241	CYP3A43_21503T>C(N198N)	0.126	T // C	A // B	0.874	0.126	NaN	N	snp	97.3	1			0.049 (G)		0.012 (G)
1712	AM_14860	rs45621431	7	99454482	CYP3A43_28744G>A(M275I)	0.039	G // A	A // B	0.961	0.039	NaN	N	snp	100	1			N/D		N/D
1713	AM_14861	rs680055	7	99457605	CYP3A43*3_31867C>G(P340A)	0.101	G // C	A // B	0.101	0.899	NaN	N	snp	100	1			0.053 (C )		0.012 (C )
1714	AM_14862	rs17342647	7	99459256	CYP3A43*1B_33518C>T(A349A)	0.007	C // T	A // B	0.993	0.007	NaN	N	snp	100	1			0.124 (t)		N/D
1715	AM_14871	rs6962039	7	122754358	SLC13A1_c.*1214C>T	0.371	C // T	A // B	0.629	0.371	NaN	N	snp	100	1			0.246 (A)		0.330 (A)
1716	AM_14873	rs6466854	7	122755445	SLC13A1_c.*127C>T	0.007	C // T	A // B	0.993	0.007	NaN	N	snp	100	1			0.000 (A)		0.000 (A)
1717	AM_14896	rs2140516	7	122809234	SLC13A1_c.521A>G(N174S)	0.172	A // G	A // B	0.828	0.172	NaN	N	snp	99.9	1			0.286 (C )		0.372 (C )
1718	AM_14911	rs10281158	7	122837541	SLC13A1_c.99+2361G>A	0.002	G // A	A // B	0.998	0.002	NaN	N	snp	100	1			0.000 (T)		0.000 (T)
1719	AM_14912	rs2204295	7	122838090	SLC13A1_c.99+1812C>G	0.481	G // C	A // B	0.481	0.519	NaN	N	snp	100	1			0.414 (C )		0.378 (C )
1720	AM_14913	rs1880179	7	122838633	SLC13A1_c.99+1269C>A	0.46	C // A	A // B	0.54	0.46	NaN	N	snp	99.7	1			0.414 (T)		0.414 (T)
1721	AM_14914	rs28364174	7	122839925	SLC13A1_c.76C>T(L26L)	0	C // T	A // B	1	0	NaN	N	snp	100	1
1722	AM_14917	rs6138	7	139572123	TBXAS1*2_c.182G>A(R61H)	0	A // G	A // B	0	1	NaN	N	snp	100	1
1723	AM_14918	rs41275018	7	139636013	TBXAS1*1B_c.360G>A(S120S)	0.003	G // A	A // B	0.997	0.003	NaN	N	snp	100	1			0.000 (A)		N/D
1724	AM_14919	rs8192833	7	139636026	TBXAS1_c.373G>A(V125I)	0	A // G	A // B	0	1	NaN	N	snp	100	1
1725	AM_14920	rs5768	7	139653196	TBXAS1*3_c.483C>A(D161E)	0.016	A // C	A // B	0.016	0.984	NaN	N	snp	68	1			0.009 (T)		0.012 (T)
1726	AM_14921	rs6137	7	139653200	TBXAS1_c.487C>A(L163I)	0	A // C	A // B	0	1	NaN	N	snp	100	1
1727	AM_14922	rs1042561	7	139655300	TBXAS1_c.585C>G(A195A)	0	C // G	A // B	1	0	NaN	N	snp	100	1
1728	AM_14923	rs55856189	7	139657478	TBXAS1*4_c.737A>G(N246S)	0	A // G	A // B	1	0	NaN	N	snp	100	1
1729	AM_14924	rs5769	7	139657513	TBXAS1_c.772A>G(K258E)	0.001	G // A	A // B	0.001	0.999	NaN	N	snp	100	1			0.000 (G)		0.000 (G)
1730	AM_14925	rs5770	7	139657522	TBXAS1_c.781A>G(R261G)	0	G // A	A // B	0	1	NaN	N	snp	100	1
1731	AM_14926	rs5771	7	139661844	TBXAS1_c.949C>A(Q317K)	0	C // A	A // B	1	0	NaN	N	snp	100	1
1732	AM_14927	rs6140	7	139661890	TBXAS1_c.995T>C(I332T)	0	T // C	A // B	1	0	NaN	N	snp	100	1
1733	AM_14928	rs4529	7	139661964	TBXAS1*5_c.1069C>G(L357V)	0.011	C // G	A // B	0.989	0.011	NaN	N	snp	100	1			0.000 (G)		0.000 (G)
1734	AM_14929	rs3735354	7	139706915	TBXAS1_c.1162G>A(E388K)	0	G // A	A // B	1	0	NaN	N	snp	100	1
1735	AM_14930	rs5760	7	139706922	TBXAS1_c.1169G>T(G390V)	0	G // T	A // B	1	0	NaN	N	snp	99.9	1
1736	AM_14931	rs5761	7	139706959	TBXAS1_c.1206G>A(L402L)	0	G // A	A // B	1	0	NaN	N	snp	100	1
1737	AM_14932	rs4528	7	139715542	TBXAS1*6_c.1249C>G(Q417E)	0.001	C // G	A // B	0.999	0.001	NaN	N	snp	100	1			0.000 (G)		N/D
1738	AM_14933	rs5762	7	139715566	TBXAS1_c.1273C>T(R425C)	0.001	C // T	A // B	0.999	0.001	NaN	N	snp	100	1			N/D		N/D
1739	AM_14934	rs4526	7	139715581	TBXAS1_c.1288G>A(A430T)	0	A // G	A // B	0	1	NaN	N	snp	99.9	1
1740	AM_14935	rs4527	7	139715598	TBXAS1_c.1305C>T(A435A)	0	C // T	A // B	1	0	NaN	N	snp	100	1
1741	AM_14936	rs8192868	7	139715641	TBXAS1*7_c.1348G>A(E450K)	0.18	A // G	A // B	0.18	0.82	NaN	N	snp	81.5	1			0.041 (A)		N/D
1742	AM_14937	rs5763	7	139715645	TBXAS1*8_c.1352C>A(T451N)	0.021	A // C	A // B	0.021	0.979	NaN	N	snp	100	1			0.035 (A)		0.000 (A)
1743	AM_14938	rs5764	7	139717487	TBXAS1_c.1384C>A(R462R)	0	A // C	A // B	0	1	NaN	N	snp	100	1
1744	AM_14939	rs41311778	7	139717500	TBXAS1*9_c.1397G>A(R466Q)	0	G // A	A // B	1	0	NaN	N	snp	100	1
1745	AM_14940	rs8192864	7	139717608	TBXAS1_c.1505G>A(R502Q)	0	G // A	A // B	1	0	NaN	N	snp	99.9	1
1746	AM_14941	rs56091454	7	139720020	TBXAS1*1D_c.*121G>A(3'UTR)	0	A // G	A // B	0	1	NaN	N	snp	100	1
1747	AM_14942	rs17173645	7	150549427	ABP1_c.-4132C>T	0	T // C	A // B	0	1	NaN	N	snp	100	1
1748	AM_14950	rs10893	7	150555915	ABP1_c.1635A>G(P545P)	0.283	G // A	A // B	0.283	0.717	NaN	N	snp	100	1			0.323 (G)		0.5
1749	AM_14951	rs6943147	7	150556055	ABP1_c.1775C>G(T592R)	0	G // C	A // B	1	0	NaN	N	snp	100	1
1750	AM_14952	rs6943420	7	150556056	ABP1_c.1776C>G(T592T)	0	C // G	A // B	1	0	NaN	N	snp	100	1
1751	AM_14953	rs12179	7	150557622	ABP1_c.1890G>A(S630S)	0.279	G // A	A // B	0.721	0.279	NaN	N	snp	100	1			0.310 (A)		0.5
1752	AM_14954	rs1049793	7	150557665	ABP1_c.1933C>G(H645D)	0.279	C // G	A // B	0.721	0.279	NaN	N	snp	100	1			0.305 (G)		0.395 (C )
1753	AM_14955	rs12539	7	150558366	ABP1_c.*69C>T	0.19	C // T	A // B	0.81	0.19	NaN	N	snp	99.6	1			0.177 (T)		0.116 (T)
1754	AM_14963	rs72554605	8	18067575	NAT1_c.-11982A>T	0	T // A	A // B	0	1	NaN	N	snp	100	1
1755	AM_14965	rs4986988	8	18079213	NAT1*11_c.-344C>T	0.12	C // T	A // B	0.88	0.12	NaN	N	snp	100	1			0.035 (T)		0.000 (T)
1756	AM_14966	rs4986989	8	18079517	NAT1*11_c.-40A>T	0.12	A // T	A // B	0.88	0.12	NaN	N	snp	100	1			N/D		N/D
1757	AM_14968	rs4986992	8	18079577	NAT1*27_c.21T>G(L7L)	0.004	G // T	A // B	0.004	0.996	NaN	N	snp	100	1			N/D		N/D
1758	AM_14969	rs56318881	8	18079653	NAT1*19_c.97C>T(R33X)	0	C // T	A // B	1	0	NaN	N	snp	100	1
1759	AM_14970	rs56379106	8	18079746	NAT1_c.190C>T(R64W)	0.002	C // T	A // B	0.998	0.002	NaN	N	snp	100	1			N/D		N/D
1760	AM_14971	rs72554606	8	18079906	NAT1*5_c.350GG>CC(R117T)	0	GG // CC	A // B	1	0	NaN	N	snp	100	1
1761	AM_14973	rs8190858	8	18079919	NAT1_c.363C>T(V121V)	0	C // T	A // B	1	0	NaN	N	snp	100	1
1762	AM_14974	rs4987076	8	18080001	NAT1_c.445G>A(V149I)	0.118	A // G	A // B	0.118	0.882	NaN	N	snp	100	1			0.03 (A)		0.00 (A)
1763	AM_14975	rs4986990	8	18080015	NAT1*11_c.459G>A(T153T)	0.114	G // A	A // B	0.886	0.114	NaN	N	snp	98.6	1			0.04 (A)		0.000 (A)
1764	AM_14976	rs72554608	8	18080053	NAT1*5_c.497GGG>CCC(RE166TQ)	0	CCC // GGG	A // B	0	1	NaN	N	snp	100	1
1765	AM_14977	rs5030839	8	18080115	NAT1*15_c.559C>T(R187X)	0.002	C // T	A // B	0.998	0.002	NaN	N	snp	100	1			N/D		N/D
1766	AM_14978	rs4986782	8	18080116	NAT1*14_c.560G>A(R187Q)	0	G // A	A // B	1	0	NaN	N	snp	100	1
1767	AM_14980	rs4987195	8	18080176	NAT1_c.620C>T(T207I)	0	C // T	A // B	1	0	NaN	N	snp	100	1
1768	AM_14981	rs4986783	8	18080196	NAT1*11_c.640T>G(S214A)	0.12	G // T	A // B	0.12	0.88	NaN	N	snp	100	1			0.04 (G)		0.00 (G)
1769	AM_14982	rs56172717	8	18080308	NAT1*22_c.752A>T(D251V)	0	T // A	A // B	0	1	NaN	N	snp	100	1
1770	AM_14983	rs4986991	8	18080333	NAT1_c.777T>C(S259S)	0.004	C // T	A // B	0.004	0.996	NaN	N	snp	100	1			N/D		N/D
1771	AM_14986	rs55793712	8	18080440	NAT1*5_884A>G(3'UTR)	0	G // A	A // B	0	1	NaN	N	snp	100	1
1772	AM_14987	rs4986994	8	18080487	NAT1_931C>T(3'UTR)	0	C // T	A // B	1	0	NaN	N	snp	100	1
1773	AM_14988	rs72554612	8	18080532	NAT1*5_976delA(3'UTR)	0	- // A	A // B	0	1	NaN	N	in-del	100	1
1774	AM_14993	rs4986993	8	18080747	NAT1_1191G>T(3'UTR)	0.42	G // T	A // B	0.58	0.42	NaN	N	snp	100	1			0.24 (T)		0.48 (G)
1775	AM_14997	rs72554615	8	18257624	NAT2_c.111T>C(F37F)	0	C // T	A // B	0	1	NaN	N	snp	100	1
1776	AM_14998	rs1805158	8	18257703	NAT2*19_c.190C>T(R64W)	0	C // T	A // B	1	0	NaN	N	snp	100	1
1777	AM_14999	rs1801279	8	18257704	NAT2*14_c.191G>A(R64Q)	0.009	G // A	A // B	0.991	0.009	NaN	N	snp	100	1			0.014 (A)		0.000 (A)
1778	AM_15000	rs1041983	8	18257795	NAT2_c.282C>T(Y94Y)	0.297	C // T	A // B	0.703	0.297	NaN	N	snp	99.1	1			0.30 (T)		0.38 (T)
1779	AM_15001	rs1801280	8	18257854	NAT2*5_c.341T>C(I114T)	0.495	T // C	A // B	0.505	0.495	NaN	N	snp	99.6	1			0.44 (C )		0.02 (C )
1780	AM_15002	rs4986996	8	18257877	NAT2*12D_c.364G>A(D122N)	0	G // A	A // B	1	0	NaN	N	snp	100	1
1781	AM_15004	rs4986997	8	18257924	NAT2_c.411A>T(L137F)	0	A // T	A // B	1	0	NaN	N	snp	100	1
1782	AM_15005	rs72554616	8	18257947	NAT2*17_c.434A>C(Q145P)	0	A // C	A // B	1	0	NaN	N	snp	100	1
1783	AM_15006	rs1799929	8	18257994	NAT2_c.481C>T(L161L)	0.485	C // T	A // B	0.515	0.485	NaN	N	snp	99.1	1			0.40 (T)		0.01 (T)
1784	AM_15007	rs72554617	8	18258012	NAT2*10_c.499G>A(E167K)	0	A // G	A // B	0	1	NaN	N	snp	100	1
1785	AM_15008	rs1799930	8	18258103	NAT2*6_c.590G>A(R197Q)	0.275	G // A	A // B	0.725	0.275	NaN	N	snp	100	1			0.29 (A)		0.17 (A)
1786	AM_15009	rs56011192	8	18258272	NAT2_c.759C>T(V253V)	0	C // T	A // B	1	0	NaN	N	snp	100	1
1787	AM_15010	rs1208	8	18258316	NAT2_c.803A>G(K268R)	0.489	A // G	A // B	0.489	0.511	NaN	N	snp	99.4	1			0.39 (G)		0.01 (G)
1788	AM_15011	rs56054745	8	18258358	NAT2*18_c.845A>C(K282T)	0	A // C	A // B	1	0	NaN	N	snp	100	1
1789	AM_15012	rs1799931	8	18258370	NAT2*7_c.857G>A(G286E)	0.014	A // G	A // B	0.014	0.986	NaN	N	snp	100	1			0.01 (A)		0.21 (A)
1790	AM_15013	rs72554618	8	18258372	NAT2_c.859T>C(S287P)	0	T // C	A // B	1	0	NaN	N	snp	100	1
1791	AM_15014	rs2234912	8	27348788	EPHX2_c.63C>A(G21G)	0.001	A // C	A // B	0.001	0.999	NaN	N	snp	100	1			N/D		N/D
1792	AM_15017	rs41507953	8	27358505	EPHX2_c.164A>G(K55R)	0.108	A // G	A // B	0.892	0.108	NaN	N	snp	100	1			0.14 (G)		0.00 (G)
1793	AM_15018	rs17057255	8	27361241	EPHX2_c.307C>T(R103C)	0.099	C // T	A // B	0.901	0.099	NaN	N	snp	99.9	1			0.01 (T)		0.01 (T)
1794	AM_15019	rs57699806	8	27362587	EPHX2_c.461G>A(C154Y)	0	A // G	A // B	0	1	NaN	N	snp	100	1
1795	AM_15037	rs8192879	8	59403576	CYP7A1_9082G>A	0.398	G // A	A // B	0.602	0.398	NaN	N	snp	99.9	1			0.39 (A)		0.26 (A)
1796	AM_15041	rs8192875	8	59407065	CYP7A1_5593G>A(D347N)	0.009	A // G	A // B	0.009	0.991	NaN	N	snp	100	1			0.00 (A)		0.01 (A)
1797	AM_15042	rs8192874	8	59409373	CYP7A1_3285A>G(N233S)	0	A // G	A // B	1	0	NaN	N	snp	100	1
1798	AM_15047	rs3808607	8	59412924	CYP7A1_-267A>C	0.305	C // A	A // B	0.305	0.695	NaN	N	snp	100	1			0.35 (G)		0.42 (G)
1799	AM_15048	rs12542233	8	59414401	CYP7A1_-1744G>A	0.316	A // G	A // B	0.684	0.316	NaN	N	snp	100	1			0.38 (C )		0.43 (T)
1800	AM_15049	rs881671	8	59417107	CYP7A1_-4450G>C	0.015	C // G	A // B	0.015	0.985	NaN	N	snp	100	1			0.01 (C )		0.00 (C )
1801	AM_15050	rs13251066	8	59417753	CYP7A1_-5096T>C	0.39	T // C	A // B	0.61	0.39	NaN	N	snp	100	1			0.40 (G)		0.36 (G)
1802	AM_15053	rs8192907	8	65509150	CYP7B1_201995C>T	0.001	C // T	A // B	0.999	0.001	NaN	N	snp	100	1			0.00 (T)		0.04 (T)
1803	AM_15085	rs13265049	8	65702140	CYP7B1_9005T>A	0.157	T // A	A // B	0.843	0.157	NaN	N	snp	63.1	1			0.10 (T)		0.00 (T)
1804	AM_15086	rs6987861	8	65709467	CYP7B1_1678T>C	0.378	T // C	A // B	0.622	0.378	NaN	N	snp	99.4	1			0.20 (C)		0.14 (C )
1805	AM_15090	rs6980478	8	65720734	CYP7B1_-9589T>C	0.159	T // C	A // B	0.841	0.159	NaN	N	snp	100	1			0.14 (G)		0.00 (G)
1806	AM_15094	rs1138541	8	70584628	SLCO5A1_c.*476G>A	0.458	A // G	A // B	0.458	0.542	NaN	N	snp	100	1			0.29 (A)		0.24 (A)
1807	AM_15095	rs16936279	8	70584809	SLCO5A1_c.*295A>C	0.301	C // A	A // B	0.301	0.699	NaN	N	snp	99.7	1			0.14 (G)		0.30 (G)
1808	AM_15113	rs2380563	8	70605072	SLCO5A1_c.1623-10494C>A	0.075	C // A	A // B	0.925	0.075	NaN	N	snp	99.7	1			0.11 (T)		0.05 (T)
1809	AM_15200	rs3750266	8	70744812	SLCO5A1_c.97C>T(L33F)	0.498	T // C	A // B	0.502	0.498	NaN	N	snp	99.4	1			0.41 (T)		0.31 (T)
1810	AM_15202	rs3750268	8	70745171	SLCO5A1_c.-263G>T	0.293	T // G	A // B	0.293	0.707	NaN	N	snp	97.7	1			0.33 (A)		0.28 (A)
1811	AM_15210	rs4736312	8	143953937	CYP11B1_7293G>T	0.259	T // G	A // B	0.259	0.741	NaN	N	snp	100	1			0.47 (C )		0.12 (C )
1812	AM_15211	rs1134095	8	143954290	CYP11B1_6940T>C	0.259	C // T	A // B	0.259	0.741	NaN	N	snp	100	1			0.47 (C )		0.12 (C )
1813	AM_15212	rs7003319	8	143954747	CYP11B1_6483G>A	0.259	G // A	A // B	0.741	0.259	NaN	N	snp	100	1			0.47 (T)		0.12 (T)
1814	AM_15213	rs5017237	8	143954759	CYP11B1_6471G>T	0	T // G	A // B	0	1	NaN	N	snp	100	1
1815	AM_15215	rs5017239	8	143954853	CYP11B1_6377G>A	0	G // A	A // B	1	0	NaN	N	snp	100	1
1816	AM_15216	rs1137487	8	143955074	CYP11B1_6156T>A	0	A // T	A // B	0	1	NaN	N	snp	100	1
1817	AM_15217	rs5303	8	143955095	CYP11B1_6135C>T	0.241	C // T	A // B	0.759	0.241	NaN	N	snp	100	1			0.47 (T)		0.13 (T)
1818	AM_15218	rs1137486	8	143955097	CYP11B1_6133G>A	0	A // G	A // B	0	1	NaN	N	snp	100	1
1819	AM_15219	rs1137484	8	143955113	CYP11B1_6117C>T	0	T // C	A // B	0	1	NaN	N	snp	100	1
1820	AM_15220	rs5302	8	143955144	CYP11B1_6086A>G	0	A // G	A // B	1	0	NaN	N	snp	100	1
1821	AM_15221	rs5027480	8	143955221	CYP11B1_6009G>A	0	G // A	A // B	1	0	NaN	N	snp	100	1
1822	AM_15224	rs5300	8	143955338	CYP11B1_5892A>C	0	A // C	A // B	1	0	NaN	N	snp	100	1
1823	AM_15225	rs5298	8	143955581	CYP11B1_5649T>G	0	G // T	A // B	0	1	NaN	N	snp	100	1
1824	AM_15226	rs5297	8	143955657	CYP11B1_5573T>C	0.176	C // T	A // B	0.176	0.824	NaN	N	snp	99.4	1			0.08 (C )		0.00 (C )
1825	AM_15228	rs4998899	8	143956544	CYP11B1_4686T>G(S409S)	0	T // G	A // B	1	0	NaN	N	snp	100	1
1826	AM_15233	rs5292	8	143957734	CYP11B1_3496C>G(L293V)	0	C // G	A // B	1	0	NaN	N	snp	100	1
1827	AM_15238	rs5282	8	143961043	CYP11B1_187G>C(D63H)	0	C // G	A // B	0	1	NaN	N	snp	100	1
1828	AM_15239	rs4534	8	143961102	CYP11B1_128G>A(R43Q)	0.294	G // A	A // B	0.706	0.294	NaN	N	snp	91.1	1			0.03 (A)		0.46 (G)
1829	AM_15240	rs6405	8	143961201	CYP11B1_29G>A(C10Y)	0	A // G	A // B	0	1	NaN	N	snp	100	1			0.00 (A)		0.00 (A)
1830	AM_15252	rs5315	8	143994136	CYP11B2_5121T>A(V403E)	0	T // A	A // B	1	0	NaN	N	snp	100	1			0.00 (A)		0.00 (A)
1831	AM_15258	rs4544	8	143994806	CYP11B2_4451T>C(I339T)	0.064	T // C	A // B	0.936	0.064	NaN	N	snp	98.1	1			0.0 (C )		0.04 (C )
1832	AM_15259	rs4543	8	143995743	CYP11B2_3514G>A(A297A)	0.154	G // A	A // B	0.846	0.154	NaN	N	snp	100	1			0.08 (A)		0.00 (A)
1833	AM_15260	rs4536	8	143995761	CYP11B2_3496A>G(A291A)	0.05	G // A	A // B	0.05	0.95	NaN	N	snp	99.4	1			0.03 (A)		0.06 (A)
1834	AM_15279	rs1063447	9	75520910	ALDH1A1_c.1397T>A(F466Y)	0	A // T	A // B	0	1	NaN	N	snp	100	1			N/D		N/D
1835	AM_15282	rs8187929	9	75540504	ALDH1A1_c.529A>T(I177F)	0.001	T // A	A // B	0.001	0.999	NaN	N	snp	100	1			0 (T)		0.02 (T)
1836	AM_15284	rs1049981	9	75543888	ALDH1A1_c.362A>G(N121S)	0	A // G	A // B	1	0	NaN	N	snp	100	1
1837	AM_15285	rs13959	9	75545882	ALDH1A1_c.225C>T(S75S)	0.369	C // T	A // B	0.631	0.369	NaN	N	snp	100	1			0.43 (C )		0.36 (T)
1838	AM_15292	rs8187866	9	75568387	ALDH1A1_c.-471del17	0.023	- // CCAGGGTTCTCTCCTCA	A // B	0.023	0.977	NaN	N	in-del	97.6	1			N/D		N/D
1839	AM_15297	rs7853758	9	86900926	SLC28A3_c.1381C>T(L461L)	0.136	T // C	A // B	0.136	0.864	NaN	N	snp	100	1			0.17 (A)		0.13 (A)
1840	AM_15299	rs7043492	9	86905096	SLC28A3_c.1122C>T(S374S)	0.006	T // C	A // B	0.006	0.994	NaN	N	snp	100	1			0.00 (A)		0.00 (A)
1841	AM_15306	rs10868138	9	86917301	SLC28A3_c.338A>G(Y113C)	0.074	G // A	A // B	0.074	0.926	NaN	N	snp	98.6	1			0.10 (C )		0.06 (C )
1842	AM_15307	rs7867504	9	86920236	SLC28A3_c.267G>A(T89T)	0.305	G // A	A // B	0.305	0.695	NaN	N	snp	82.2	1			0.37 (C )		0.41 (T)
1843	AM_15310	rs11568421	9	86928334	SLC28A3_c.96A>G(S32S)	0.001	G // A	A // B	0.001	0.999	NaN	N	snp	100	1			0.00 (G)		0.00 (G)
1844	AM_15311	rs11568403	9	86955535	SLC28A3_c.14G>A(S5N)	0.014	A // G	A // B	0.014	0.986	NaN	N	snp	100	1			0.01 (T)		0.01 (T)
1845	AM_15312	rs10868153	9	86983368	SLC28A3_c.-47A>C	0.068	A // C	A // B	0.932	0.068	NaN	N	snp	100	1			0.03 (G)		0.01 (G)
1846	AM_15317	rs11552130	9	117086027	ORM1_c.199T>C(F67L)	0	C // T	A // B	0	1	NaN	N	snp	99.3	1
1847	AM_15319	rs1803076	9	117086329	ORM1_c.289C>T(L97L)	0	C // T	A // B	1	0	NaN	N	snp	99.9	1
1848	AM_15320	rs1803077	9	117087099	ORM1_c.358C>T(L120L)	0	T // C	A // B	0	1	NaN	N	snp	100	1
1849	AM_15322	rs1126712	9	117087125	ORM1_c.384C>G(Y128X)	0	C // G	A // B	1	0	NaN	N	snp	100	1
1850	AM_15334	rs2636889	9	117093110	ORM2_c.296T>C(V99A)	0.02	T // C	A // B	0.98	0.02	NaN	N	snp	100	1			0.0 (C )		0.0 (C )
1851	AM_15335	rs12685968	9	117093939	ORM2_c.421G>C(G141R)	0.002	C // G	A // B	0.002	0.998	NaN	N	snp	100	1			0.0 (C )		0.03 (C )
1852	AM_15349	rs1805343	9	137328286	RXRA_c.1242-27G>A	0.407	G // A	A // B	0.407	0.593	NaN	N	snp	86.5	1			0.31 (G)		0.26 (G)
1853	AM_15351	rs72554631	9	137329930	RXRA_c.*1470C>T	0	C // T	A // B	1	0	NaN	N	snp	100	1
1854	AM_15355	rs9615	9	137331525	RXRA_c.*3065G>C	0.053	C // G	A // B	0.053	0.947	NaN	N	snp	100	1			0.03 (C )		0.0 (C )
1855	AM_15367	rs72554632	X	43591031	MAOA_c.886C>T(Q296X)	0	C // T	A // B	1	0	NaN	N	snp	100	1
1856	AM_15369	rs1799835	X	43591085	MAOA_c.940T>G(F314V)	0	T // G	A // B	1	0	NaN	N	snp	100	1
1857	AM_15370	rs1800465	X	43592016	MAOA_c.1026A>T(P342P)	0	A // T	A // B	1	0	NaN	N	snp	100	1
1858	AM_15375	N/A	X	43599964	MAOA_c.1143G>T(L381L)	0	G // T	A // B	1	0	NaN	N	snp	98	1
1859	AM_15379	rs1803986	X	43603113	MAOA_c.1335G>T(M445I)	0	G // T	A // B	1	0	NaN	N	snp	100	1			N/D		N/D
1860	AM_15380	rs1137070	X	43603391	MAOA_c.1410C>T(D470D)	0.291	C // T	A // B	0.709	0.291	NaN	N	snp	99.4	1			0.27 (T)		0.31 (C )
1861	AM_15381	rs1800466	X	43603735	MAOA_c.1559A>G(K520R)	0	A // G	A // B	1	0	NaN	N	snp	100	1
1862	AM_15389	rs6324	X	43626815	MAOB_c.1461C>T(P487P)	0.011	T // C	A // B	0.011	0.989	NaN	N	snp	99.9	1			0.004 (T)		0.13 (T)
1863	AM_15390	rs1799836	X	43627999	MAOB_c.1348-36A>G	0.496	A // G	A // B	0.496	0.504	NaN	N	snp	100	1			0.40 (G)		0.19 (G)
1864	AM_15392	rs5952696	X	43639615	MAOB_c.1053A>G(K351K)	0.003	A // G	A // B	0.997	0.003	NaN	N	snp	100	1			N/D		N/D
1865	AM_15393	rs7879356	X	43656384	MAOB_c.606A>G(T202T)	0.005	G // A	A // B	0.005	0.995	NaN	N	snp	100	1			0.0 (C )		0.0 (C )
1866	AM_15395	rs17852046	X	43661506	MAOB_c.389C>A(P130Q)	0	A // C	A // B	0	1	NaN	N	snp	100	1
1867	AM_15396	rs17856663	X	43702944	MAOB_c.113G>A(R38H)	0	G // A	A // B	1	0	NaN	N	snp	100	1
1868	AM_15403	rs6521128	X	46445660	CHST7_c.*31+10802G>A	0.295	G // A	A // B	0.705	0.295	NaN	N	snp	100	1			0.14 (A)		0.48 (A)
1869	AM_15404	rs11796837	X	46449664	CHST7_c.*32-7531A>C	0.027	A // C	A // B	0.973	0.027	NaN	N	snp	98.9	1			0.06 (C )		0.0 (C )
1870	AM_15405	rs12012841	X	46454265	CHST7_c.*32-2930C>A	0.024	C // A	A // B	0.976	0.024	NaN	N	snp	100	1			0.0 (A)		0.0 (A)
1871	AM_15406	rs7056956	X	46457221	CHST7_c.*58G>A(3'UTR)	0.048	G // A	A // B	0.952	0.048	NaN	N	snp	100	1			0.0 (A)		0.0 (A)
1872	AM_15407	rs735716	X	46457786	CHST7_c.*623A>G(3'UTR)	0.382	A // G	A // B	0.618	0.382	NaN	N	snp	99.9	1			0.45 (G)		0.42 (G)
1873	AM_15408	rs732316	X	46458623	CHST7_c.*675+785T>G(3'UTR)	0.422	G // T	A // B	0.422	0.578	NaN	N	snp	100	1			0.45 (C )		0.42 (C )
1874	AM_15409	rs12014644	X	46460615	CHST7_c.*675+2777C>T(3'UTR)	0.006	T // C	A // B	0.006	0.994	NaN	N	snp	100	1			0.0 (T)		0.0 (T)
1875	AM_15414	rs1340990	X	74284996	ABCB7_c.1743A>G(A581A)	0.028	G // A	A // B	0.028	0.972	NaN	N	snp	100	1			0.0 (G)		0.0 (G)
1876	AM_15415	rs1340989	X	74284997	ABCB7_c.1742C>T(A581V)	0.025	C // T	A // B	0.975	0.025	NaN	N	snp	100	1			N/D		N/D
1877	AM_15422	rs1054914	X	74295240	ABCB7_c.815T>C(L272P)	0	C // T	A // B	0	1	NaN	N	snp	100	1
1878	AM_15423	rs1054913	X	74295279	ABCB7_c.776G>A(R259K)	0	G // A	A // B	1	0	NaN	N	snp	99.4	1
1879	AM_15424	rs4892538	X	74298421	ABCB7_c.457-1932A>T	0.006	A // T	A // B	0.994	0.006	NaN	N	snp	100	1			0.0 (A )		0.31 (A )
1880	AM_15425	rs5937939	X	74299007	ABCB7_c.457-2518A>G	0.018	G // A	A // B	0.018	0.982	NaN	N	snp	99.9	1			0.02 (C )		0.02 (C )
1881	AM_15437	rs61743418	X	77244041	ATP7A_c.424C>G(L142V)	0	C // G	A // B	1	0	NaN	N	snp	100	1
1882	AM_15438	rs72554635	X	77244116	ATP7A_c.499C>T(Q167X)	0	C // T	A // B	1	0	NaN	N	snp	100	1
1883	AM_15439	rs2228447	X	77244182	ATP7A_c.565A>G(I189V)	0	A // G	A // B	1	0	NaN	N	snp	100	1
1884	AM_15440	rs72554636	X	77245343	ATP7A_c.1225C>T(R409X)	0	C // T	A // B	1	0	NaN	N	snp	100	1
1885	AM_15441	rs2234934	X	77254028	ATP7A_c.1390T>C(L464L)	0	C // T	A // B	0	1	NaN	N	snp	100	1
1886	AM_15454	rs2227291	X	77268502	ATP7A_c.2299G>C(V767L)	0.333	C // G	A // B	0.333	0.667	NaN	N	snp	100	1			0.27 (C )		0.21 (C )
1887	AM_15472	rs5959130	X	77301044	ATP7A_c.4201G>C(V1401L)	0	C // G	A // B	0	1	NaN	N	snp	100	1
1888	AM_15479	rs72554658	X	105277591	SERPINA7_c.1148C>T(P383L)	0	C // T	A // B	1	0	NaN	N	snp	100	1
1889	AM_15485	rs2234036	X	105279368	SERPINA7_c.631G>A(A211T)	0	A // G	A // B	0	1	NaN	N	snp	100	1
1890	AM_15486	rs28933688	X	105280653	SERPINA7_c.397G>C(A133P)	0	G // C	A // B	1	0	NaN	N	snp	100	1
1891	AM_15487	rs28933689	X	105280703	SERPINA7_c.347T>A(I116N)	0	A // T	A // B	0	1	NaN	N	snp	100	1
1892	AM_15488	rs72554661	X	105280906	SERPINA7_c.144C>A(D48E)	0	A // C	A // B	0	1	NaN	N	snp	100	1
1893	AM_15489	rs72554662	X	105280923	SERPINA7_c.127T>A(S43T)	0	A // T	A // B	0	1	NaN	N	snp	100	1
1894	AM_15490	rs72554663	X	105280995	SERPINA7_c.55C>T(H19Y)	0	C // T	A // B	1	0	NaN	N	snp	100	1
1895	AM_15492	rs72554665	X	153760484	G6PD_c.1466G>T(R489L)	0	T // G	A // B	0	1	NaN	N	snp	100	1
1896	AM_15493	rs5030869	X	153761205	G6PD_c.1093G>A(A365T)	0	A // G	A // B	0	1	NaN	N	snp	100	1
1897	AM_15494	rs5030868	X	153762634	G6PD_c.653C>T(S218F)	0	C // T	A // B	1	0	NaN	N	snp	100	1
1898	AM_15496	rs1050829	X	153763492	G6PD_c.466A>G(N156D)	0.024	A // G	A // B	0.976	0.024	NaN	N	snp	99.7	1			N/D		N/D
1899	AM_15497	rs5030870	X	153763531	G6PD_c.427G>A(D143N)	0	G // A	A // B	1	0	NaN	N	snp	100	1
1900	AM_15498	rs11555344	X	153764190	G6PD_c.319G>T(V107L)	0	T // G	A // B	0	1	NaN	N	snp	100	1
1901	AM_15502	rs1080983	22	42528568	CYP2D6_-1770G>A	0.385	A // G	A // B	0.385	0.615	NaN	N	snp	99	1			0.34 (A)		N/D
1902	AM_15506	rs28360521	22	42528976	CYP2D6_-2178G>A	0.119	G // A	A // B	0.881	0.119	NaN	N	snp	100	1			0.23 (T)		N/D
1903	AM_10002	rs34828900|rs4747236	10	73769384	CHST3_c.*1155G>CorGG	0	C // G // GG	A // B // C	0	1	0	N	in-del	100	1
1904	AM_10070	rs4244285	10	96541616	CYP2C19*2_19154G>A(P227P)	0.093	G // C // A	A // B // C	0.907	0	0.093	N	snp	100	1			0.15 (A)		0.26 (A)
1905	AM_10131	rs72558195	10	96824643	CYP2C8*7or*8_4517C>T>G(R186XorG)	0	T // G // C	A // B // C	0	0	1	N	snp	100	1
1906	AM_10153	rs4267009	10	101564000	ABCC2_c.1434G>T>A(A478AorA)	0	T // G // A	A // B // C	0	1	0	N	snp	100	1
1907	AM_10189	rs56296335	10	101610393	ABCC2_c.4348G>T>A(A1450SorT)	0	A // G // T	A // B // C	0	1	0	N	snp	100	1
1908	AM_10249	rs72559710	10	135342034	CYP2E1*2_1132G>A(R76H)	0	A // C // G	A // B // C	0	0	1	N	snp	100	1
1909	AM_10611	rs1751034	13	95714976	ABCC4_c.3348A>GorDel(K1116KorX)	0.286	- // G // A	A // B // C	0	0.286	0.714	N	snp	94.5	1			0.15 (C )		0.2 (C )
1910	AM_10766	rs41279188	15	75012979	CYP1A1*5or*9_2460C>A>T(R464SorC)	0	A // C // T	A // B // C	0	1	0	N	snp	100	1			0.02 (T)		N/D
1911	AM_10926	rs72547522	16	16150052	ABCC1_c.1577A>CorCA(D526AorX)	0	A // C // CA	A // B // C	1	0	0	N	in-del	100	1			N/D		N/D
1912	AM_11016	rs67944833	16	29473201	SULT1A3_C>T>A(P101LorH)_alternate	0.003	A // C // T	A // B // C	0	0.997	0.003	N	snp	100	1
1913	AM_11027	rs67944833	16	30212544	SULT1A3_C>T>A(P101LorH)	0.003	A // C // T	A // B // C	0	0.997	0.003	N	snp	100	1			N/D		N/D
1914	AM_11728	rs2234696	1	110279602	GSTM3_c.*91A>C>G	0.111	A // C // G	A // B // C	0.889	0.111	0	N	snp	100	1			0.06 (C )		N/D
1915	AM_12275	rs5030865	22	42525035	CYP2D6*14or*8_1758G>A>T(G169RorX)	0.001	T // G // A	A // B // C	0	0.999	0.001	Y	snp	99.4	1			N/D		N/D
1916	AM_12447	rs72549371	2	38297881	CYP1B1_c.1616A>GorAG(K539RorX)	0	G // AG // A	A // B // C	0	0	1	N	in-del	98.7	1
1917	AM_12453	rs4986889	2	38298105	CYP1B1_4424A>T(S464S)	0	T // G // A	A // B // C	0	0	1	N	snp	100	1
1918	AM_12455	rs1056837	2	38298150	CYP1B1_4379C>TorA(D449DorE)	0.363	A // C // T	A // B // C	0	0.637	0.363	N	snp	100	1			0.45 (T)		0.14 (T)
1919	AM_12773	rs4148771	2	169875534	ABCB11_c.-899delCT_alternate	0.028	T // CCT // C	A // B // C	0	0.972	0.028	N	in-del	98.1	1			N/D		N/D
1920	AM_13895	rs72552719	5	131667462	SLC22A4_c.965T>CorCT(L322PorX)	0	C // CT // T	A // B // C	0	0	1	N	in-del	100	1			N/D		N/D
1921	AM_14410	rs668871	6	160769811	SLC22A3_c.360C>T>G(R120R)	0.484	T // G // C	A // B // C	0.484	0	0.516	N	snp	91.7	1			0 (C/A)		0 (C/A)
1922	AM_14592	rs2032582	7	87160618	ABCB1_c.2677G>T>A(A893SorT)	0.352	A // G // T	A // B // C	0.01	0.648	0.342	N	snp	99.3	1			0.47 (T)		0.38 (G)
1923	AM_14653	rs2230768	7	91670136	AKAP9_c.4841G>A>C(R1614P)	0.001	A // C // G	A // B // C	0.001	0	0.999	N	snp	100	1			N/D		0.03 (A)
1924	AM_14674	rs72552786	7	94931591	PON1_c.835G>TorGT(D279YorX)	0	T // GT // G	A // B // C	0	0	1	N	in-del	99.4	1
1925	AM_14826	rs4986908	7	99367392	CYP3A4*10_14304G>C(D174H)	0	A // C // G	A // B // C	0	0	1	N	snp	100	1
1926	AM_15021	rs72554619	8	27364505	EPHX2_c.654A>TorTA(G218G)	0	A // T // TA	A // B // C	1	0	0	N	in-del	99.3	1
1927	AM_15267	rs5281	8	143999146	CYP11B2_111G>A>C(P37P)	0	A // C // G	A // B // C	0	0	1	N	snp	100	1
1928	AM_15281	rs5898283	9	75524647	ALDH1A1_c.1228_1229A>GorAG(K410EorX)	0	G // AG // A	A // B // C	0	0	1	N	in-del	100	1
1929	AM_15293	rs72554629	9	75568477	ALDH1A1_c.-561ins3	0.008	- // TAC // GTA	A // B // C	0.992	0	0.008	N	in-del	99.7	1			N/D		N/D
1930	AM_15353	rs17847914	9	137330562	RXRA_c.*2102G>TorC	0	T // G // C	A // B // C	0	1	0	N	snp	100	1			N/D		N/D
1931	AM_15503	N/A	22	42528759	CYP2D6_-1961C>G>A	0	G // C // A	A // B // C	0	1	0	N	snp	100	1			N/D		N/D
